# Supplementary material for: Plastome structure and phylogenetic relationships of genus Hydrocotyle (apiales): provide insights into the plastome evolution of Hydrocotyle
Source: PubMed Central journal article supplement — BMC Plant Biol. 2024 Aug 15;24:778. doi: 10.1186/s12870-024-05483-w (PMC11325595; doi:10.1186/s12870-024-05483-w), 2024-08-15

# Plastome structure and phylogenetic relationships of genus *Hydrocotyle* (Apiales): provide insights into the plastome evolution of *Hydrocotyle*

Jun Wen<sup>1</sup>, Bao-Cheng Wu<sup>1</sup>, Hui-Min Li<sup>1</sup>, Wei Zhou<sup>1</sup>, Chun-Feng Song<sup>1,\*</sup>

\*Correspondence: Chun-Feng Song [cfsong79@cnbg.net](mailto:cfsong79@cnbg.net)

<sup>1</sup> Jiangsu Key Laboratory for the Research and Utilization of Plant Resources, Institute of Botany, Jiangsu Province and Chinese Academy of Sciences (Nanjing Botanical Garden Mem. Sun Yat-Sen), Nanjing, China

## Abstract:

**Background** The genus *Hydrocotyle* Tourn. ex L. is a key group for further study on the evolution of Apiales, comprising around 170 species globally. Previous studies mainly focused on separate sections and provided much information about this genus, but its infrageneric relationships are still confusing. In addition, the genetic basis of its adaptive evolution remains poorly understood. To investigate the phylogeny and evolution of the genus, we selected ten representative species covering two of three diversity distribution centers and exhibiting rich morphology diversity. Comparative plastome analysis was conducted to clarify the structural character of *Hydrocotyle* plastomes. Positive selection analyses were implemented to assess the evolution of the genus. Phylogenetic inferences with protein-coding sequences of *Hydrocotyle* and 17 related species were also performed.

**Results** Plastomes within *Hydrocotyle* were generally conservative in structure, gene order, and size. A total of 14 regions (*rps16-trnK*, *trnQ-rps16*, *atpI-atpH*, *trnC-petN-psbM*, *ycf3-trnS*, *accD-psaI-ycf4*, *petA-psbJ*, *rps12-rpl20*, *rpl16* intron, *rps3-rpl16* intron, *rps9-rpl22*, *ndhF-rpl32*, *ndhA* intron, and *ycf1a*) were recognized as hotspot regions within the genus, which suggested to be promising DNA barcodes for global phylogenetic analysis of *Hydrocotyle*. The *ycf15* gene was suggested to be a protein-coding gene for *Hydrocotyle* species, and it could be used as a DNA barcode to identify *Hydrocotyle*. In phylogenetic analysis, three monophyletic clades (Clade I, II, III) were identified with evidence of rapid radiation speciation within Clade I. The selective pressure analysis detected that six CDS genes (*ycf1b*, *matK*, *atpF*, *accD*, *rps14*, and *psbB*) of *Hydrocotyle* species were under positive selection. Within the genus, the last four genes were conservative, suggesting a relation to the unique evolution of the genus in Apiales. Seven genes (*atpE*, *matK*, *psbH*, *ycf1a*, *ycf1b*, *rpoA*, and *ycf2*) were detected to be under some degree of positive selection in different taxa within the genus *Hydrocotyle*, indicating their role in the adaptive evolution of species.

**Conclusions** Our study offers new insights into the phylogeny and adaptive evolution of *Hydrocotyle*. The plastome sequences could significantly enhance phylogenetic resolution and provide genomic resources and potential DNA markers useful for future studies of the genus.

**Keywords:** *Hydrocotyle*, Apiales, positive selection, adaptive evolution, phylogeny

**Table S1. Voucher information for species newly sequenced in this study.**

| Species name                                             | Collection number | Collector name | Locality                                                                    | Latitude Longitude         | Place of voucher deposition | deposition number | Determiner |
|----------------------------------------------------------|-------------------|----------------|-----------------------------------------------------------------------------|----------------------------|-----------------------------|-------------------|------------|
| <i>Hydrocotyle dielsiana</i>                             | Wj-20210901-01    | Jun Wen        | Guanmen Mountain, Shennongjia Forestry District; Hubei; China               | N 31.442716° E 110.387546° | NAS                         | NAS00638767       | Jun Wen    |
| <i>Hydrocotyle hookeri</i> subsp. <i>chinensis</i>       | Wj-2021071403-06  | Jun Wen        | Yangjiajie; Zhangjiajie; Hunan; China                                       | N 29.365066° E 110.434589° | NAS                         | NAS00638751       | Jun Wen    |
| <i>Hydrocotyle leucocephala</i>                          | Wj-20211206-01    | You-Pai Zeng   | South China Botanical Garden, Chinese Academy of Sciences; Guangdong; China | N 23.18794° E 113.373781°  | NAS                         | NAS00638791       | Jun Wen    |
| <i>Hydrocotyle sibthorpioides</i>                        | Wj-2021071406-01  | Jun Wen        | Suoxiyu Nature Reserve; Zhangjiajie; Hunan; China                           | N 29.376384° E 110.49026°  | NAS                         | NAS00638796       | Jun Wen    |
| <i>Hydrocotyle sibthorpioides</i> var. <i>batrachium</i> | Wj-20210830-01    | Hui-Min Li     | Qizimei Mountains; Hubei; China                                             | N 30.029761° E 109.757311° | NAS                         | NAS00638784       | Jun Wen    |
| <i>Hydrocotyle verticillata</i>                          | Wj-2021072303-01  | Jun Wen        | Nanjing Botanical Garden Mem.Sun Yat-Sen; Jiangsu; China                    | N 32.055262° E 118.838222° | NAS                         | NAS00638788       | Jun Wen    |

NAS: Herbarium, Institute of Botany, Chinese Academy of Sciences, Jiangsu Province

**Table S2. Accession numbers for species derived from NCBI.**

| Species name                                        | Family             | accession number |
|-----------------------------------------------------|--------------------|------------------|
| <i>Aralia elata</i>                                 | Araliaceae         | KT153023         |
| <i>Bupleurum chinense</i>                           | Apiaceae           | MT561025         |
| <i>Centella asiatica</i>                            | Apiaceae           | MN854377         |
| <i>Chamaesium spatuliferum</i>                      | Apiaceae           | MN119371         |
| <i>Dendropanax dentiger</i>                         | Araliaceae         | NC_026546        |
| <i>Dickinsia hydrocotyloides</i>                    | Apiaceae           | MT423729         |
| <i>Eleutherococcus senticosus</i>                   | Araliaceae         | NC_016430        |
| <i>Eryngium campestre</i>                           | Apiaceae           | OK585059         |
| <i>Fatsia japonica</i>                              | Araliaceae         | NC_027685        |
| <i>Hedera nepalensis</i> var. <i>sinensis</i>       | Araliaceae         | MK130890         |
| <i>Panax ginseng</i>                                | Araliaceae         | KF431956         |
| <i>Panax japonicus</i> var. <i>bipinnatifidus</i>   | Araliaceae         | NC_043952        |
| <i>Raukava edgerleyi</i>                            | Araliaceae         | NC_049887        |
| <i>Sanicula orthacantha</i> var. <i>stolonifera</i> | Apiaceae           | MT561028         |
| <i>Schefflera delavayi</i>                          | Araliaceae         | NC_022813        |
| <i>Torilis scabra</i>                               | Apiaceae           | MT561029         |
| <i>Torricellia angulata</i>                         | Torricelliaceae    | NC_031509        |
| <i>Torricellia tiliifolia</i>                       | Torricelliaceae    | MK599408         |
| <i>Hydrocotyle nepalensis</i>                       | <i>Hydrocotyle</i> | MT561038         |
| <i>Hydrocotyle pseudoconferta</i>                   | <i>Hydrocotyle</i> | OK585058         |
| <i>Hydrocotyle verticillata</i>                     | <i>Hydrocotyle</i> | NC_015818        |
| <i>Hydrocotyle sibthorpioides</i>                   | <i>Hydrocotyle</i> | NC_035502        |
| <i>Heteromorpha arborescens</i>                     | Apiaceae           | MT786054         |

**Table S3. Distances among ten *Hydrocotyle* plastomes. The values represent the percentage of identical bases.**

| Taxa                                            | <i>Hydrocotyle nepalensis</i> MT561038 | <i>H. hookeri</i> subsp. <i>chinensis</i> | <i>H. dielsiana</i> | <i>H. pseudoconferta</i> OK585058 | <i>H. sibthorpioides</i> | <i>H. sibthorpioides</i> _NC_035502 | <i>H. sibthorpioides</i> var. <i>batrachium</i> | <i>H. leucocephala</i> | <i>H. verticillata</i> | <i>H. verticillata</i> _NC_015818 |
|-------------------------------------------------|----------------------------------------|-------------------------------------------|---------------------|-----------------------------------|--------------------------|-------------------------------------|-------------------------------------------------|------------------------|------------------------|-----------------------------------|
| <i>H. nepalensis</i> MT561038                   |                                        | 99.97                                     | 99.94               | 99.92                             | 97.79                    | 97.82                               | 97.89                                           | 97.95                  | 97.6                   | 97.59                             |
| <i>H. hookeri</i> subsp. <i>chinensis</i>       | 99.97                                  |                                           | 99.95               | 99.93                             | 97.8                     | 97.82                               | 97.89                                           | 97.95                  | 97.61                  | 97.6                              |
| <i>H. dielsiana</i>                             | 99.94                                  | 99.95                                     |                     | 99.95                             | 97.82                    | 97.85                               | 97.92                                           | 97.99                  | 97.64                  | 97.63                             |
| <i>H. pseudoconferta</i> OK585058               | 99.92                                  | 99.93                                     | 99.95               |                                   | 97.82                    | 97.85                               | 97.89                                           | 97.97                  | 97.62                  | 97.61                             |
| <i>H. sibthorpioides</i>                        | 97.79                                  | 97.8                                      | 97.82               | 97.82                             |                          | 99.95                               | 98.82                                           | 96.8                   | 96.53                  | 96.49                             |
| <i>H. sibthorpioides</i> _NC_035502             | 97.82                                  | 97.82                                     | 97.85               | 97.85                             | 99.95                    |                                     | 98.85                                           | 96.83                  | 96.56                  | 96.52                             |
| <i>H. sibthorpioides</i> var. <i>batrachium</i> | 97.89                                  | 97.89                                     | 97.92               | 97.89                             | 98.82                    | 98.85                               |                                                 | 96.91                  | 96.6                   | 96.6                              |
| <i>H. leucocephala</i>                          | 97.95                                  | 97.95                                     | 97.99               | 97.97                             | 96.8                     | 96.83                               | 96.91                                           |                        | 98.18                  | 98.14                             |
| <i>H. verticillata</i>                          | 97.6                                   | 97.61                                     | 97.64               | 97.62                             | 96.53                    | 96.56                               | 96.6                                            | 98.18                  |                        | 99.56                             |
| <i>H. verticillata</i> _NC_015818               | 97.59                                  | 97.6                                      | 97.63               | 97.61                             | 96.49                    | 96.52                               | 96.6                                            | 98.14                  | 99.56                  |                                   |

**Table S4. Nucleotide diversity (Pi) of the *Hydrocotyle* plastome sequences under a slide window calculated in DnaSP v6. Regions with Pi> 0.017 were tagged with genetic information.**

| Window        | Midpoint | Pi      | Region                 |
|---------------|----------|---------|------------------------|
| 1-641         | 341      | 0.01094 |                        |
| 209-841       | 541      | 0.00515 |                        |
| 442-1041      | 741      | 0.00321 |                        |
| 642-1241      | 941      | 0.00267 |                        |
| 842-1441      | 1141     | 0.00121 |                        |
| 1042-1652     | 1341     | 0.00261 |                        |
| 1242-1854     | 1541     | 0.00533 |                        |
| 1442-2063     | 1754     | 0.01352 |                        |
| 1653-2263     | 1963     | 0.01345 |                        |
| 1855-2463     | 2163     | 0.01394 |                        |
| 2064-2663     | 2363     | 0.01164 |                        |
| 2264-2863     | 2563     | 0.01473 |                        |
| 2464-3063     | 2763     | 0.01436 |                        |
| 2664-3263     | 2963     | 0.01358 |                        |
| 2864-3463     | 3163     | 0.01167 |                        |
| 3064-3676     | 3363     | 0.01167 |                        |
| 3264-3876     | 3570     | 0.00936 |                        |
| 3464-4076     | 3776     | 0.00921 |                        |
| 3677-4294     | 3976     | 0.01036 |                        |
| 3877-4507     | 4176     | 0.01212 |                        |
| 4077-4707     | 4394     | 0.01585 |                        |
| 4295-4934     | 4607     | 0.02106 | <i>trnK(UUU)-rps16</i> |
| 4508-5134     | 4812     | 0.02058 | <i>trnK(UUU)-rps16</i> |
| 4708-5334     | 5034     | 0.01661 |                        |
| 4935-5548     | 5234     | 0.00867 |                        |
| 5135-5754     | 5439     | 0.00933 |                        |
| 5335-5965     | 5654     | 0.00982 |                        |
| 5549-6171     | 5854     | 0.01218 |                        |
| 5755-6371     | 6065     | 0.01103 |                        |
| 5966-6590     | 6271     | 0.01364 |                        |
| 6172-6918     | 6490     | 0.01424 |                        |
| 6372-7149     | 6799     | 0.01624 |                        |
| 6591-7383     | 7018     | 0.01376 |                        |
| 6919-7591     | 7271     | 0.01915 | <i>trnQ(UUG)-rps16</i> |
| 7150-7816     | 7491     | 0.01594 |                        |
| 7384-8016     | 7707     | 0.01321 |                        |
| 7592-8217     | 7916     | 0.00461 |                        |
| 7817-8439     | 8117     | 0.00533 |                        |
| 8017-8650     | 8335     | 0.00964 |                        |
| 8218-8852     | 8549     | 0.01255 |                        |
| 8440-9052     | 8752     | 0.01158 |                        |
| 8651-9261     | 8952     | 0.01194 |                        |
| 8853-9492     | 9159     | 0.01279 |                        |
| 9053-9692     | 9389     | 0.01364 |                        |
| 9262-9894     | 9592     | 0.01073 |                        |
| 100155-100754 | 100454   | 0.00073 |                        |
| 100355-100983 | 100654   | 0.00176 |                        |
| 100555-101183 | 100873   | 0.00133 |                        |
| 100755-101383 | 101083   | 0.00188 |                        |
| 10095-10760   | 10421    | 0.0097  |                        |
| 100984-101583 | 101283   | 0.00115 |                        |
| 101184-101783 | 101483   | 0.00085 |                        |
| 101384-101983 | 101683   | 0.00133 |                        |
| 101584-102183 | 101883   | 0.00158 |                        |
| 101784-102383 | 102083   | 0.00158 |                        |
| 101984-102583 | 102283   | 0.00085 |                        |
| 102184-102783 | 102483   | 0.0003  |                        |
| 102384-102983 | 102683   | 0.0003  |                        |
| 102584-103183 | 102883   | 0       |                        |
| 102784-103383 | 103083   | 0.0003  |                        |
| 10296-10960   | 10653    | 0.01552 |                        |
| 102984-103583 | 103283   | 0.0003  |                        |

|               |        |         |
|---------------|--------|---------|
| 103184-103783 | 103483 | 0.0003  |
| 103384-103983 | 103683 | 0       |
| 103584-104183 | 103883 | 0.00145 |
| 103784-104389 | 104083 | 0.00218 |
| 103984-104589 | 104289 | 0.00218 |
| 104184-104789 | 104489 | 0.00073 |
| 104390-104989 | 104689 | 0       |
| 104590-105189 | 104889 | 0.00073 |
| 104790-105389 | 105089 | 0.00103 |
| 104990-105589 | 105289 | 0.00103 |
| 105190-105789 | 105489 | 0.0003  |
| 10522-11160   | 10860  | 0.01285 |
| 105390-105989 | 105689 | 0       |
| 105590-106189 | 105889 | 0.0003  |
| 105790-106389 | 106089 | 0.00085 |
| 105990-106589 | 106289 | 0.00085 |
| 106190-106789 | 106489 | 0.00085 |
| 106390-106989 | 106689 | 0.0003  |
| 106590-107189 | 106889 | 0.0003  |
| 106790-107389 | 107089 | 0       |
| 106990-107589 | 107289 | 0       |
| 107190-107789 | 107489 | 0       |
| 107390-107989 | 107689 | 0.00085 |
| 107590-108189 | 107889 | 0.00085 |
| 10761-11360   | 11060  | 0.00994 |
| 107790-108389 | 108089 | 0.00085 |
| 107990-108589 | 108289 | 0       |
| 108190-108789 | 108489 | 0       |
| 108390-108989 | 108689 | 0       |
| 108590-109189 | 108889 | 0       |
| 108790-109389 | 109089 | 0.00103 |
| 108990-109617 | 109289 | 0.00103 |
| 109190-109817 | 109507 | 0.00158 |
| 109390-110017 | 109717 | 0.00315 |
| 10961-11560   | 11260  | 0.00339 |
| 109618-110218 | 109917 | 0.00388 |
| 109818-110418 | 110118 | 0.00424 |
| 110018-110618 | 110318 | 0.00236 |
| 110219-110818 | 110518 | 0.00164 |
| 110419-111018 | 110718 | 0.00145 |
| 110619-111218 | 110918 | 0.0023  |
| 110819-111418 | 111118 | 0.00303 |
| 111019-111618 | 111318 | 0.00261 |
| 111219-111818 | 111518 | 0.00248 |
| 111419-112021 | 111718 | 0.00636 |
| 11161-11760   | 11460  | 0.00424 |
| 111619-112221 | 111921 | 0.01164 |
| 111819-112421 | 112121 | 0.01285 |
| 112022-112621 | 112321 | 0.01491 |
| 112222-112821 | 112521 | 0.01048 |
| 112422-113021 | 112721 | 0.00994 |
| 112622-113221 | 112921 | 0.004   |
| 112822-113421 | 113121 | 0.00285 |
| 113022-113621 | 113321 | 0.00291 |
| 113222-113821 | 113521 | 0.00388 |
| 113422-114021 | 113721 | 0.00442 |
| 11361-11960   | 11660  | 0.00394 |
| 113622-114243 | 113921 | 0.00739 |
| 113822-114473 | 114124 | 0.013   |
| 114022-114789 | 114365 | 0.02094 |
| 114244-114999 | 114589 | 0.02564 |
| 114474-115220 | 114889 | 0.02418 |
| 114790-115435 | 115104 | 0.01873 |
| 115000-115637 | 115335 | 0.01415 |
| 115221-115900 | 115535 | 0.01394 |
| 115436-116175 | 115746 | 0.01618 |
| 11561-12160   | 11860  | 0.00442 |

*ndhF-rpl32*  
*ndhF-rpl32*  
*ndhF-rpl32*  
*ndhF-rpl32*

|               |        |         |                    |
|---------------|--------|---------|--------------------|
| 115638-116376 | 116069 | 0.01691 |                    |
| 115901-116576 | 116276 | 0.01476 |                    |
| 116176-116776 | 116476 | 0.01148 |                    |
| 116377-116982 | 116676 | 0.00664 |                    |
| 116577-117182 | 116882 | 0.00533 |                    |
| 116777-117382 | 117082 | 0.00436 |                    |
| 116983-117583 | 117282 | 0.00594 |                    |
| 117183-117783 | 117482 | 0.00861 |                    |
| 117383-117983 | 117683 | 0.00891 |                    |
| 117584-118183 | 117883 | 0.00855 |                    |
| 11761-12360   | 12060  | 0.00564 |                    |
| 117784-118383 | 118083 | 0.00642 |                    |
| 117984-118583 | 118283 | 0.00582 |                    |
| 118184-118783 | 118483 | 0.00564 |                    |
| 118384-118983 | 118683 | 0.00509 |                    |
| 118584-119183 | 118883 | 0.00685 |                    |
| 118784-119385 | 119083 | 0.0083  |                    |
| 118984-119585 | 119283 | 0.00685 |                    |
| 119184-119785 | 119485 | 0.00539 |                    |
| 119386-119985 | 119685 | 0.00333 |                    |
| 119586-120185 | 119885 | 0.004   |                    |
| 11961-12560   | 12260  | 0.00588 |                    |
| 119786-120385 | 120085 | 0.00897 |                    |
| 119986-120585 | 120285 | 0.00915 |                    |
| 120186-120785 | 120485 | 0.00933 |                    |
| 120386-120997 | 120685 | 0.00564 |                    |
| 120586-121230 | 120885 | 0.00818 |                    |
| 120786-121449 | 121130 | 0.00952 |                    |
| 120998-121649 | 121349 | 0.00952 |                    |
| 121231-121851 | 121549 | 0.00879 |                    |
| 121450-122051 | 121749 | 0.01103 |                    |
| 12161-12760   | 12460  | 0.00982 |                    |
| 121650-122251 | 121951 | 0.01261 |                    |
| 121852-122451 | 122151 | 0.01139 |                    |
| 122052-122667 | 122351 | 0.01152 |                    |
| 122252-122871 | 122551 | 0.018   | <i>ndhA intron</i> |
| 122452-123077 | 122767 | 0.01988 | <i>ndhA intron</i> |
| 122668-123283 | 122977 | 0.01921 | <i>ndhA intron</i> |
| 122872-123490 | 123183 | 0.01224 |                    |
| 123078-123690 | 123390 | 0.01209 |                    |
| 123284-123890 | 123590 | 0.00821 |                    |
| 123491-124090 | 123790 | 0.00585 |                    |
| 12361-12976   | 12660  | 0.0083  |                    |
| 123691-124290 | 123990 | 0.0023  |                    |
| 123891-124490 | 124190 | 0.00394 |                    |
| 124091-124690 | 124390 | 0.00412 |                    |
| 124291-124890 | 124590 | 0.00594 |                    |
| 124491-125090 | 124790 | 0.00533 |                    |
| 124691-125290 | 124990 | 0.0077  |                    |
| 124891-125498 | 125190 | 0.01036 |                    |
| 125091-125704 | 125398 | 0.01115 |                    |
| 125291-125927 | 125598 | 0.01327 |                    |
| 125499-126160 | 125818 | 0.01255 |                    |
| 12561-13185   | 12876  | 0.01067 |                    |
| 125705-126360 | 126060 | 0.01812 | <i>ycfI-rps15</i>  |
| 125928-126560 | 126260 | 0.01709 | <i>ycfI-rps15</i>  |
| 126161-126760 | 126460 | 0.01752 | <i>ycfI</i>        |
| 126361-126966 | 126660 | 0.01485 |                    |
| 126561-127184 | 126866 | 0.01552 |                    |
| 126761-127384 | 127084 | 0.01588 |                    |
| 126967-127584 | 127284 | 0.01842 | <i>ycfI</i>        |
| 127185-127784 | 127484 | 0.02024 | <i>ycfI</i>        |
| 127385-127984 | 127684 | 0.02103 | <i>ycfI</i>        |
| 127585-128184 | 127884 | 0.01867 | <i>ycfI</i>        |
| 12761-13385   | 13085  | 0.00733 |                    |
| 127785-128384 | 128084 | 0.01545 |                    |
| 127985-128584 | 128284 | 0.01958 | <i>ycfI</i>        |

|               |        |         |                       |
|---------------|--------|---------|-----------------------|
| 128185-128793 | 128484 | 0.02006 | <i>ycfI</i>           |
| 128385-128993 | 128684 | 0.02224 | <i>ycfI</i>           |
| 128585-129193 | 128893 | 0.01661 |                       |
| 128794-129393 | 129093 | 0.01742 | <i>ycfI</i>           |
| 128994-129593 | 129293 | 0.01679 |                       |
| 129194-129793 | 129493 | 0.01442 |                       |
| 129394-130050 | 129693 | 0.01506 |                       |
| 129594-130250 | 129914 | 0.0147  |                       |
| 12977-13585   | 13285  | 0.00661 |                       |
| 129794-130450 | 130150 | 0.01809 | <i>trnD(GUC)-psbM</i> |
| 130051-130650 | 130350 | 0.0147  |                       |
| 130251-130883 | 130550 | 0.02485 | <i>ycfI</i>           |
| 130451-131083 | 130783 | 0.02018 | <i>ycfI</i>           |
| 130651-131283 | 130983 | 0.0163  |                       |
| 130884-131483 | 131183 | 0.00248 |                       |
| 131084-131683 | 131383 | 0.00261 |                       |
| 131284-131883 | 131583 | 0.00303 |                       |
| 131484-132083 | 131783 | 0.00158 |                       |
| 131684-132283 | 131983 | 0.00236 |                       |
| 13186-13803   | 13485  | 0.01097 |                       |
| 131884-132483 | 132183 | 0.00164 |                       |
| 132084-132684 | 132383 | 0.00267 |                       |
| 132284-132884 | 132584 | 0.00388 |                       |
| 132484-133084 | 132784 | 0.00388 |                       |
| 132685-133312 | 132984 | 0.00285 |                       |
| 132885-133512 | 133212 | 0.00103 |                       |
| 133085-133712 | 133412 | 0.00103 |                       |
| 133313-133912 | 133612 | 0.00103 |                       |
| 133513-134112 | 133812 | 0       |                       |
| 133713-134312 | 134012 | 0       |                       |
| 13386-14003   | 13689  | 0.01515 |                       |
| 133913-134512 | 134212 | 0       |                       |
| 134113-134712 | 134412 | 0       |                       |
| 134313-134912 | 134612 | 0.00085 |                       |
| 134513-135112 | 134812 | 0.00085 |                       |
| 134713-135312 | 135012 | 0.00085 |                       |
| 134913-135512 | 135212 | 0       |                       |
| 135113-135712 | 135412 | 0       |                       |
| 135313-135912 | 135612 | 0       |                       |
| 135513-136112 | 135812 | 0.0003  |                       |
| 135713-136312 | 136012 | 0.0003  |                       |
| 13586-14203   | 13903  | 0.01558 |                       |
| 135913-136512 | 136212 | 0.00085 |                       |
| 136113-136712 | 136412 | 0.00085 |                       |
| 136313-136912 | 136612 | 0.00085 |                       |
| 136513-137112 | 136812 | 0.0003  |                       |
| 136713-137312 | 137012 | 0       |                       |
| 136913-137512 | 137212 | 0.0003  |                       |
| 137113-137712 | 137412 | 0.00103 |                       |
| 137313-137912 | 137612 | 0.00103 |                       |
| 137513-138112 | 137812 | 0.00073 |                       |
| 137713-138312 | 138012 | 0.00073 |                       |
| 137913-138518 | 138212 | 0.00073 |                       |
| 13804-14403   | 14103  | 0.01127 |                       |
| 138113-138718 | 138412 | 0.00218 |                       |
| 138313-138918 | 138618 | 0.00145 |                       |
| 138519-139118 | 138818 | 0.00145 |                       |
| 138719-139318 | 139018 | 0       |                       |
| 138919-139518 | 139218 | 0.0003  |                       |
| 139119-139718 | 139418 | 0.0003  |                       |
| 139319-139918 | 139618 | 0.0003  |                       |
| 139519-140118 | 139818 | 0       |                       |
| 139719-140318 | 140018 | 0.0003  |                       |
| 139919-140518 | 140218 | 0.0003  |                       |
| 14004-14618   | 14303  | 0.00709 |                       |
| 140119-140718 | 140418 | 0.00115 |                       |
| 140319-140918 | 140618 | 0.00158 |                       |



|               |        |         |
|---------------|--------|---------|
| 140519-141118 | 140818 | 0.00158 |
| 140719-141318 | 141018 | 0.00103 |
| 140919-141518 | 141218 | 0.00085 |
| 141119-141728 | 141418 | 0.00115 |
| 141319-141947 | 141618 | 0.00188 |
| 141519-142147 | 141828 | 0.00133 |
| 141729-142347 | 142047 | 0.00176 |
| 141948-142547 | 142247 | 0.00073 |
| 14204-14821   | 14514  | 0.01279 |
| 142148-142747 | 142447 | 0.00073 |
| 142348-142947 | 142647 | 0       |
| 142548-143147 | 142847 | 0.0003  |
| 142748-143347 | 143047 | 0.0003  |
| 142948-143547 | 143247 | 0.0003  |
| 143148-143747 | 143447 | 0.00073 |
| 143348-143947 | 143647 | 0.00382 |
| 143548-144147 | 143847 | 0.00382 |
| 143748-144347 | 144047 | 0.004   |
| 143948-144547 | 144247 | 0.00091 |
| 14404-15043   | 14721  | 0.01552 |
| 144148-144747 | 144447 | 0.00145 |
| 144348-144947 | 144647 | 0.00085 |
| 144548-145147 | 144847 | 0.00115 |
| 144748-145347 | 145047 | 0.00061 |
| 144948-145547 | 145247 | 0.0003  |
| 145148-145747 | 145447 | 0       |
| 145348-145947 | 145647 | 0       |
| 145548-146147 | 145847 | 0       |
| 145748-146371 | 146047 | 0.00121 |
| 145948-146571 | 146247 | 0.00121 |
| 146148-146771 | 146471 | 0.00194 |
| 14619-15254   | 14943  | 0.01788 |
| 146372-146976 | 146671 | 0.00648 |
| 146572-147176 | 146876 | 0.00709 |
| 146772-147376 | 147076 | 0.00667 |
| 146977-147576 | 147276 | 0.00091 |
| 147177-147776 | 147476 | 0.0003  |
| 147377-147976 | 147676 | 0       |
| 147577-148182 | 147876 | 0       |
| 147777-148382 | 148076 | 0.00127 |
| 147977-148582 | 148282 | 0.00127 |
| 148183-148782 | 148482 | 0.00333 |
| 14822-15454   | 15147  | 0.01509 |
| 148383-148982 | 148682 | 0.00206 |
| 148583-149182 | 148882 | 0.00309 |
| 148783-149400 | 149082 | 0.00176 |
| 148983-149600 | 149300 | 0.00176 |
| 149183-149800 | 149500 | 0.00145 |
| 149401-150000 | 149700 | 0.00145 |
| 149601-150200 | 149900 | 0.00461 |
| 149801-150400 | 150100 | 0.00533 |
| 150001-150600 | 150300 | 0.00636 |
| 150201-150800 | 150500 | 0.00406 |
| 150401-151000 | 150700 | 0.00321 |
| 15044-15654   | 15354  | 0.0103  |
| 150601-151200 | 150900 | 0.002   |
| 150801-151400 | 151100 | 0.00115 |
| 151001-151600 | 151300 | 0.00055 |
| 151201-151800 | 151500 | 0.00206 |
| 151401-152000 | 151700 | 0.00333 |
| 151601-152200 | 151900 | 0.00333 |
| 151801-152400 | 152100 | 0.00345 |
| 152001-152600 | 152300 | 0.00309 |
| 152201-152800 | 152500 | 0.00339 |
| 152401-153000 | 152700 | 0.00339 |
| 15255-15854   | 15554  | 0.00758 |
| 152601-153200 | 152900 | 0.00321 |

*atpI-atpH*

|               |        |         |
|---------------|--------|---------|
| 152801-153400 | 153100 | 0.00467 |
| 153001-153600 | 153300 | 0.00248 |
| 153201-153800 | 153500 | 0.00176 |
| 153401-154000 | 153700 | 0       |
| 153601-154200 | 153900 | 0.0003  |
| 153801-154400 | 154100 | 0.0003  |
| 154001-154600 | 154300 | 0.00103 |
| 154201-154800 | 154500 | 0.00073 |
| 154401-155000 | 154700 | 0.00127 |
| 15455-16054   | 15754  | 0.00588 |
| 154601-155200 | 154900 | 0.00055 |
| 154801-155400 | 155100 | 0.00164 |
| 155001-155600 | 155300 | 0.00109 |
| 155201-155800 | 155500 | 0.00109 |
| 155401-155991 | 155694 | 0.00192 |
| 15655-16255   | 15954  | 0.0077  |
| 15855-16460   | 16155  | 0.00818 |
| 16055-16660   | 16360  | 0.00582 |
| 16256-16860   | 16560  | 0.00315 |
| 16461-17060   | 16760  | 0.00376 |
| 16661-17262   | 16960  | 0.00885 |
| 16861-17465   | 17162  | 0.01085 |
| 17061-17665   | 17365  | 0.00818 |
| 17263-17865   | 17565  | 0.0043  |
| 17466-18065   | 17765  | 0.00248 |
| 17666-18265   | 17965  | 0.00333 |
| 17866-18465   | 18165  | 0.00297 |
| 18066-18665   | 18365  | 0.00273 |
| 18266-18865   | 18565  | 0.00491 |
| 18466-19065   | 18765  | 0.006   |
| 18666-19265   | 18965  | 0.0077  |
| 18866-19465   | 19165  | 0.00715 |
| 19066-19665   | 19365  | 0.00624 |
| 19266-19865   | 19565  | 0.00718 |
| 19466-20065   | 19765  | 0.00773 |
| 19666-20265   | 19965  | 0.00809 |
| 19866-20465   | 20165  | 0.00867 |
| 20066-20665   | 20365  | 0.00752 |
| 20266-20865   | 20565  | 0.00897 |
| 20466-21065   | 20765  | 0.00473 |
| 20666-21265   | 20965  | 0.00315 |
| 20866-21465   | 21165  | 0.00145 |
| 21066-21670   | 21365  | 0.00727 |
| 21266-21873   | 21565  | 0.0083  |
| 21466-22073   | 21773  | 0.00945 |
| 21671-22273   | 21973  | 0.00479 |
| 21874-22473   | 22173  | 0.00739 |
| 22074-22673   | 22373  | 0.00636 |
| 22274-22873   | 22573  | 0.00721 |
| 22474-23073   | 22773  | 0.00461 |
| 22674-23273   | 22973  | 0.00436 |
| 22874-23478   | 23173  | 0.00436 |
| 23074-23700   | 23375  | 0.00748 |
| 23274-23913   | 23592  | 0.00948 |
| 23479-24113   | 23805  | 0.01179 |
| 23701-24313   | 24013  | 0.00897 |
| 23914-24513   | 24213  | 0.00594 |
| 24114-24713   | 24413  | 0.00255 |
| 24314-24913   | 24613  | 0.00224 |
| 24514-25113   | 24813  | 0.004   |
| 24714-25313   | 25013  | 0.00491 |
| 24914-25513   | 25213  | 0.0057  |
| 25114-25713   | 25413  | 0.00448 |
| 25314-25913   | 25613  | 0.0043  |
| 25514-26113   | 25813  | 0.00321 |
| 25714-26313   | 26013  | 0.00424 |
| 25914-26513   | 26213  | 0.00406 |

|             |       |         |
|-------------|-------|---------|
| 26114-26713 | 26413 | 0.00358 |
| 26314-26913 | 26613 | 0.00327 |
| 26514-27113 | 26813 | 0.00412 |
| 26714-27313 | 27013 | 0.00388 |
| 26914-27513 | 27213 | 0.00345 |
| 27114-27713 | 27413 | 0.002   |
| 27314-27913 | 27613 | 0.00315 |
| 27514-28128 | 27813 | 0.00818 |
| 27714-28343 | 28022 | 0.0097  |
| 27914-28550 | 28228 | 0.014   |
| 28129-28774 | 28449 | 0.01509 |
| 28344-28998 | 28674 | 0.0177  |
| 28551-29227 | 28880 | 0.01812 |
| 28775-29427 | 29127 | 0.01442 |
| 28999-29642 | 29327 | 0.01855 |
| 29228-30137 | 29536 | 0.02182 |
| 29428-30372 | 30015 | 0.02    |
| 29643-30604 | 30248 | 0.01521 |
| 30138-30804 | 30489 | 0.00576 |
| 30373-31004 | 30704 | 0.00752 |
| 30605-31227 | 30904 | 0.01045 |
| 30805-31449 | 31104 | 0.01633 |
| 31005-31658 | 31348 | 0.01809 |
| 31228-31876 | 31558 | 0.01394 |
| 31450-32076 | 31776 | 0.01042 |
| 31659-32276 | 31976 | 0.008   |
| 31877-32481 | 32176 | 0.00709 |
| 32077-32727 | 32376 | 0.01103 |
| 32277-32983 | 32627 | 0.01358 |
| 32482-33185 | 32869 | 0.01388 |
| 32728-33385 | 33083 | 0.00933 |
| 32984-33585 | 33285 | 0.0097  |
| 33186-33820 | 33485 | 0.01248 |
| 33386-34029 | 33720 | 0.01476 |
| 33586-34252 | 33928 | 0.01191 |
| 33821-34452 | 34152 | 0.00694 |
| 34030-34652 | 34352 | 0.00376 |
| 34253-34852 | 34552 | 0.00188 |
| 34453-35052 | 34752 | 0.0023  |
| 34653-35252 | 34952 | 0.00273 |
| 34853-35452 | 35152 | 0.00327 |
| 35053-35652 | 35352 | 0.00255 |
| 35253-35852 | 35552 | 0.00218 |
| 35453-36052 | 35752 | 0.00121 |
| 35653-36252 | 35952 | 0.00194 |
| 35853-36452 | 36152 | 0.00158 |
| 36053-36652 | 36352 | 0.00388 |
| 36253-36867 | 36552 | 0.00473 |
| 36453-37073 | 36752 | 0.00552 |
| 36653-37286 | 36967 | 0.00515 |
| 36868-37490 | 37186 | 0.00618 |
| 37074-37690 | 37386 | 0.00939 |
| 37287-37900 | 37590 | 0.01    |
| 37491-38110 | 37790 | 0.00958 |
| 37691-38310 | 38004 | 0.00558 |
| 37901-38510 | 38210 | 0.00358 |
| 38111-38710 | 38410 | 0.00303 |
| 38311-38910 | 38610 | 0.00479 |
| 38511-39110 | 38810 | 0.00467 |
| 38711-39310 | 39010 | 0.00303 |
| 38911-39510 | 39210 | 0.00327 |
| 39111-39710 | 39410 | 0.00382 |
| 39311-39910 | 39610 | 0.00455 |
| 39511-40110 | 39810 | 0.00291 |
| 39711-40310 | 40010 | 0.00339 |
| 39911-40510 | 40210 | 0.00297 |
| 40111-40710 | 40410 | 0.00261 |

*rps3-rplI6 intron*  
*rpoB-trnC(GCA)-petN*

*trnC(GCA)-petN-psbM*  
*trnC(GCA)-petN-psbM*  
*petN-psbM*

*ycfI*

|             |       |         |
|-------------|-------|---------|
| 40311-40910 | 40610 | 0.00085 |
| 40511-41110 | 40810 | 0.00145 |
| 40711-41310 | 41010 | 0.00121 |
| 40911-41510 | 41210 | 0.00376 |
| 41111-41710 | 41410 | 0.00521 |
| 41311-41910 | 41610 | 0.00582 |
| 41511-42110 | 41810 | 0.00382 |
| 41711-42310 | 42010 | 0.00218 |
| 41911-42510 | 42210 | 0.0023  |
| 42111-42710 | 42410 | 0.00352 |
| 42311-42910 | 42610 | 0.00467 |
| 42511-43110 | 42810 | 0.00479 |
| 42711-43351 | 43010 | 0.0043  |
| 42911-43556 | 43210 | 0.007   |
| 43111-43771 | 43451 | 0.01039 |
| 43352-44017 | 43670 | 0.01203 |
| 43557-44227 | 43917 | 0.00921 |
| 43772-44444 | 44117 | 0.008   |
| 44018-44645 | 44344 | 0.01073 |
| 44228-44847 | 44545 | 0.01252 |
| 44445-45047 | 44747 | 0.00973 |
| 44646-45249 | 44947 | 0.00409 |
| 44848-45449 | 45147 | 0.00085 |
| 45048-45649 | 45349 | 0.00085 |
| 45250-45887 | 45549 | 0.00624 |
| 45450-46087 | 45787 | 0.00733 |
| 45650-46328 | 45987 | 0.01636 |
| 45888-46546 | 46204 | 0.01873 |
| 46088-46747 | 46440 | 0.03509 |
| 46329-46950 | 46646 | 0.02764 |
| 46547-47157 | 46850 | 0.02533 |
| 46748-47357 | 47050 | 0.01121 |
| 46951-47557 | 47257 | 0.01    |
| 47158-47757 | 47457 | 0.00455 |
| 47358-47965 | 47657 | 0.00091 |
| 47558-48237 | 47857 | 0.00588 |
| 47758-48445 | 48136 | 0.00933 |
| 47966-48779 | 48337 | 0.018   |
| 48238-48993 | 48650 | 0.01406 |
| 48446-49194 | 48893 | 0.01436 |
| 48780-49394 | 49094 | 0.00794 |
| 48994-49594 | 49294 | 0.01012 |
| 49195-49800 | 49494 | 0.00782 |
| 49395-50000 | 49700 | 0.0077  |
| 49595-50220 | 49900 | 0.00648 |
| 49801-50440 | 50116 | 0.00982 |
| 50001-50647 | 50321 | 0.01358 |
| 50221-50855 | 50547 | 0.01358 |
| 50441-51055 | 50747 | 0.00964 |
| 50648-51255 | 50955 | 0.00406 |
| 50856-51455 | 51155 | 0.00309 |
| 51056-51655 | 51355 | 0.00455 |
| 51256-51855 | 51555 | 0.00606 |
| 51456-52055 | 51755 | 0.00655 |
| 51656-52255 | 51955 | 0.00497 |
| 51856-52455 | 52155 | 0.00388 |
| 52056-53263 | 52355 | 0.00642 |
| 52256-53506 | 52555 | 0.01424 |
| 52456-53712 | 53398 | 0.01673 |
| 53264-53920 | 53611 | 0.01303 |
| 53507-54127 | 53820 | 0.00576 |
| 53713-54344 | 54022 | 0.00545 |
| 53921-54557 | 54227 | 0.01188 |
| 54128-54765 | 54444 | 0.01412 |
| 54345-54965 | 54665 | 0.01655 |
| 54558-55165 | 54865 | 0.01261 |
| 54766-55365 | 55065 | 0.01115 |

*ycf3-trnS(GGA)*  
*ycf3-trnS(GGA)*  
*trnS(GGA)*  
*ycf3-trnS(GGA)-rps4*

*trnL(UAA)-trnT(UGU)-rps4*

|             |       |         |                       |
|-------------|-------|---------|-----------------------|
| 54966-55565 | 55265 | 0.00709 |                       |
| 55166-55765 | 55465 | 0.00697 |                       |
| 55366-55965 | 55665 | 0.00564 |                       |
| 55566-56165 | 55865 | 0.00582 |                       |
| 55766-56365 | 56065 | 0.00218 |                       |
| 55966-56565 | 56265 | 0.00236 |                       |
| 56166-56782 | 56465 | 0.00594 |                       |
| 56366-56983 | 56667 | 0.01333 |                       |
| 56566-57196 | 56882 | 0.01661 |                       |
| 56783-57397 | 57092 | 0.01212 |                       |
| 56984-57597 | 57297 | 0.00691 |                       |
| 57197-57797 | 57497 | 0.00473 |                       |
| 57398-57997 | 57697 | 0.00721 |                       |
| 57598-58197 | 57897 | 0.00939 |                       |
| 57798-58397 | 58097 | 0.01024 |                       |
| 57998-58597 | 58297 | 0.00933 |                       |
| 58198-58822 | 58497 | 0.00733 |                       |
| 58398-59039 | 58697 | 0.00721 |                       |
| 58598-59244 | 58922 | 0.00909 |                       |
| 58823-59474 | 59139 | 0.01473 |                       |
| 59040-59674 | 59367 | 0.01539 |                       |
| 59245-59874 | 59574 | 0.01685 |                       |
| 59475-60074 | 59774 | 0.01164 |                       |
| 59675-60274 | 59974 | 0.01079 |                       |
| 59875-60474 | 60174 | 0.00752 |                       |
| 60075-60674 | 60374 | 0.00721 |                       |
| 60275-60874 | 60574 | 0.00594 |                       |
| 60475-61090 | 60774 | 0.00703 |                       |
| 60675-61350 | 60974 | 0.00788 |                       |
| 60875-61597 | 61208 | 0.01315 |                       |
| 61091-61806 | 61491 | 0.01564 |                       |
| 61351-62006 | 61697 | 0.01715 |                       |
| 61598-62206 | 61906 | 0.012   | <i>accD-psaI-ycf4</i> |
| 61807-62406 | 62106 | 0.00697 |                       |
| 62007-62606 | 62306 | 0.0037  |                       |
| 62207-62821 | 62506 | 0.00612 |                       |
| 62407-63021 | 62712 | 0.00885 |                       |
| 62607-63221 | 62921 | 0.0103  |                       |
| 62822-63421 | 63121 | 0.00776 |                       |
| 63022-63621 | 63321 | 0.00491 |                       |
| 63222-63841 | 63521 | 0.00388 |                       |
| 63422-64041 | 63741 | 0.00527 |                       |
| 63622-64241 | 63941 | 0.00612 |                       |
| 63842-64441 | 64141 | 0.00612 |                       |
| 64042-64641 | 64341 | 0.00709 |                       |
| 64242-64841 | 64541 | 0.00691 |                       |
| 64442-65049 | 64741 | 0.01176 |                       |
| 64642-65259 | 64941 | 0.01297 |                       |
| 64842-65459 | 65159 | 0.02406 | <i>petA-psbJ</i>      |
| 65050-65681 | 65359 | 0.02764 | <i>petA-psbJ</i>      |
| 65260-65884 | 65581 | 0.02733 | <i>petA-psbJ</i>      |
| 65460-66084 | 65784 | 0.01679 |                       |
| 65682-66294 | 65984 | 0.00691 |                       |
| 65885-66494 | 66194 | 0.00339 |                       |
| 66085-66694 | 66394 | 0.00327 |                       |
| 66295-67329 | 66594 | 0.00491 |                       |
| 66495-67539 | 66794 | 0.00824 |                       |
| 66695-67754 | 67429 | 0.01315 |                       |
| 67330-67956 | 67646 | 0.01242 |                       |
| 67540-68193 | 67856 | 0.01164 |                       |
| 67755-68411 | 68093 | 0.00594 |                       |
| 67957-68649 | 68293 | 0.00618 |                       |
| 68194-68849 | 68511 | 0.00558 |                       |
| 68412-69094 | 68749 | 0.01048 |                       |
| 68650-69294 | 68992 | 0.01127 |                       |
| 68850-69526 | 69194 | 0.01048 |                       |
| 69095-69734 | 69417 | 0.00739 |                       |

|             |       |         |
|-------------|-------|---------|
| 69295-69959 | 69634 | 0.01067 |
| 69527-70176 | 69834 | 0.01067 |
| 69735-70376 | 70076 | 0.00921 |
| 69960-70580 | 70276 | 0.01388 |
| 70177-70780 | 70476 | 0.01364 |
| 70377-70980 | 70680 | 0.01394 |
| 70581-71180 | 70880 | 0.00497 |
| 70781-71401 | 71080 | 0.01352 |
| 70981-71601 | 71301 | 0.01521 |
| 71181-71805 | 71501 | 0.01788 |
| 71402-72005 | 71704 | 0.00794 |
| 71602-72205 | 71905 | 0.0077  |
| 71806-72405 | 72105 | 0.00691 |
| 72006-72610 | 72305 | 0.01273 |
| 72206-72820 | 72510 | 0.01345 |
| 72406-73023 | 72716 | 0.01285 |
| 72611-73223 | 72923 | 0.00709 |
| 72821-73423 | 73123 | 0.00576 |
| 73024-73624 | 73323 | 0.00921 |
| 73224-73843 | 73524 | 0.01261 |
| 73424-74048 | 73730 | 0.01352 |
| 73625-74270 | 73948 | 0.01182 |
| 73844-74470 | 74148 | 0.01309 |
| 74049-74671 | 74370 | 0.00976 |
| 74271-74871 | 74571 | 0.00715 |
| 74471-75071 | 74771 | 0.003   |
| 74672-75271 | 74971 | 0.00433 |
| 74872-75471 | 75171 | 0.00518 |
| 75072-75671 | 75371 | 0.00661 |
| 75272-75871 | 75571 | 0.00794 |
| 75472-76071 | 75771 | 0.00624 |
| 75672-76277 | 75971 | 0.00782 |
| 75872-76479 | 76177 | 0.01255 |
| 76072-76687 | 76379 | 0.01424 |
| 76278-76887 | 76587 | 0.01327 |
| 76480-77089 | 76787 | 0.01515 |
| 76688-77289 | 76988 | 0.01503 |
| 76888-77490 | 77189 | 0.01552 |
| 77090-77690 | 77390 | 0.00873 |
| 77290-77895 | 77590 | 0.00727 |
| 77491-78095 | 77795 | 0.00418 |
| 77691-78295 | 77995 | 0.00315 |
| 77896-78502 | 78195 | 0.00339 |
| 78096-78717 | 78395 | 0.00685 |
| 78296-78917 | 78617 | 0.01233 |
| 78503-79117 | 78817 | 0.01336 |
| 78718-79337 | 79017 | 0.01355 |
| 78918-79537 | 79217 | 0.00988 |
| 79118-79737 | 79437 | 0.00994 |
| 79338-79957 | 79637 | 0.00848 |
| 79538-80157 | 79837 | 0.01139 |
| 79738-80357 | 80057 | 0.01194 |
| 79958-80557 | 80257 | 0.01258 |
| 80158-80757 | 80457 | 0.00724 |
| 80358-80957 | 80657 | 0.00694 |
| 80558-81157 | 80857 | 0.00515 |
| 80758-81358 | 81057 | 0.00533 |
| 80958-81558 | 81258 | 0.00418 |
| 81158-81759 | 81458 | 0.00552 |
| 81359-81967 | 81658 | 0.00588 |
| 81559-82167 | 81859 | 0.00655 |
| 81760-82373 | 82067 | 0.00706 |
| 81968-82573 | 82273 | 0.00864 |
| 82168-82773 | 82473 | 0.00755 |
| 82374-82980 | 82673 | 0.01    |
| 82574-83180 | 82880 | 0.00994 |
| 82774-83385 | 83080 | 0.01285 |

*rps12-rpl20*

|             |       |         |                            |
|-------------|-------|---------|----------------------------|
| 82981-83585 | 83280 | 0.01097 |                            |
| 83181-83785 | 83485 | 0.00909 |                            |
| 83386-84033 | 83685 | 0.01276 |                            |
| 83586-84260 | 83885 | 0.01558 |                            |
| 83786-84510 | 84142 | 0.01818 | <i>rpl16 intron</i>        |
| 84034-84714 | 84395 | 0.01409 |                            |
| 84261-84954 | 84610 | 0.01139 |                            |
| 84511-85155 | 84814 | 0.02006 | <i>rps3-rpl16 intron</i>   |
| 84715-85355 | 85055 | 0.0177  | <i>rpoB-trnC(GCA)-petN</i> |
| 84955-85555 | 85255 | 0.01594 |                            |
| 85156-85755 | 85455 | 0.00515 |                            |
| 85356-85965 | 85655 | 0.00721 |                            |
| 85556-86165 | 85865 | 0.00958 |                            |
| 85756-86498 | 86065 | 0.01912 | <i>rps19-rpl22</i>         |
| 85966-86698 | 86290 | 0.01718 | <i>rps19-rpl22</i>         |
| 86166-86901 | 86598 | 0.01403 |                            |
| 86499-87101 | 86801 | 0.00297 |                            |
| 86699-87301 | 87001 | 0.00158 |                            |
| 86902-87501 | 87201 | 0.00109 |                            |
| 87102-87701 | 87401 | 0.00164 |                            |
| 87302-87901 | 87601 | 0.00164 |                            |
| 87502-88101 | 87801 | 0.00055 |                            |
| 87702-88301 | 88001 | 0.00073 |                            |
| 87902-88501 | 88201 | 0.00103 |                            |
| 88102-88701 | 88401 | 0.00103 |                            |
| 88302-88901 | 88601 | 0.0003  |                            |
| 88502-89101 | 88801 | 0       |                            |
| 88702-89301 | 89001 | 0       |                            |
| 88902-89501 | 89201 | 0.00176 |                            |
| 89102-89701 | 89401 | 0.00321 |                            |
| 89302-89901 | 89601 | 0.00497 |                            |
| 89502-90101 | 89801 | 0.00321 |                            |
| 89702-90301 | 90001 | 0.00267 |                            |
| 89902-90501 | 90201 | 0.00309 |                            |
| 90102-90701 | 90401 | 0.00309 |                            |
| 90302-90901 | 90601 | 0.00345 |                            |
| 90502-91101 | 90801 | 0.00333 |                            |
| 90702-91301 | 91001 | 0.00333 |                            |
| 90902-91501 | 91201 | 0.00261 |                            |
| 91102-91701 | 91401 | 0.00055 |                            |
| 91302-91901 | 91601 | 0.00145 |                            |
| 91502-92101 | 91801 | 0.00248 |                            |
| 91702-92301 | 92001 | 0.00321 |                            |
| 91902-92501 | 92201 | 0.00376 |                            |
| 92102-92701 | 92401 | 0.00606 |                            |
| 92302-92901 | 92601 | 0.00533 |                            |
| 92502-93101 | 92801 | 0.00461 |                            |
| 92702-93301 | 93001 | 0.00073 |                            |
| 92902-93519 | 93201 | 0.00145 |                            |
| 93102-93719 | 93419 | 0.00176 |                            |
| 93302-93919 | 93619 | 0.00176 |                            |
| 93520-94119 | 93819 | 0.00309 |                            |
| 93720-94319 | 94019 | 0.00206 |                            |
| 93920-94519 | 94219 | 0.00333 |                            |
| 94120-94725 | 94419 | 0.00127 |                            |
| 94320-94925 | 94625 | 0.00127 |                            |
| 94520-95125 | 94825 | 0       |                            |
| 94726-95325 | 95025 | 0       |                            |
| 94926-95525 | 95225 | 0.0003  |                            |
| 9493-10094  | 9794  | 0.00915 |                            |
| 95126-95725 | 95425 | 0.00091 |                            |
| 95326-95930 | 95625 | 0.00667 |                            |
| 95526-96130 | 95830 | 0.00709 |                            |
| 95726-96330 | 96030 | 0.00648 |                            |
| 95931-96554 | 96230 | 0.00194 |                            |
| 96131-96754 | 96454 | 0.00121 |                            |
| 96331-96954 | 96654 | 0.00121 |                            |

|              |        |         |
|--------------|--------|---------|
| 96555-97154  | 96854  | 0       |
| 96755-97354  | 97054  | 0       |
| 9693-10295   | 9994   | 0.00776 |
| 96955-97554  | 97254  | 0       |
| 97155-97754  | 97454  | 0.0003  |
| 97355-97954  | 97654  | 0.00061 |
| 97555-98154  | 97854  | 0.00115 |
| 97755-98354  | 98054  | 0.00085 |
| 97955-98554  | 98254  | 0.00145 |
| 98155-98754  | 98454  | 0.00091 |
| 98355-98954  | 98654  | 0.004   |
| 98555-99154  | 98854  | 0.00382 |
| 98755-99354  | 99054  | 0.00382 |
| 9895-10521   | 10195  | 0.00836 |
| 98955-99554  | 99254  | 0.00073 |
| 99155-99754  | 99454  | 0.0003  |
| 99355-99954  | 99654  | 0.0003  |
| 99555-100154 | 99854  | 0.0003  |
| 99755-100354 | 100054 | 0       |
| 99955-100554 | 100254 | 0.00073 |

**Table S5 Summary of major characteristics of the *Hydrocotyle* plastome protein-coding sequences (CDSs), including GC content (GC%), nucleotide diversity (Pi), non-synonymous substitutions (Ka), synonymous substitutions (Ks), and the average of the Ka/Ks ratio ( $\omega$ ). Numbers of  $\omega \geq 1$  were recorded.**

| CDS         | GC%    | Pi      | Ka     | Ks     | $\omega$      | $\omega > 1$ | $\omega = 1$ |
|-------------|--------|---------|--------|--------|---------------|--------------|--------------|
| <i>accD</i> | 35.40% | 0.00874 | 0.0056 | 0.0297 | 0.1898        |              |              |
| <i>atpA</i> | 40.60% | 0.00770 | 0.0051 | 0.0224 | 0.2760        |              |              |
| <i>atpB</i> | 42.80% | 0.00515 | 0.0009 | 0.0253 | 0.0388        |              |              |
| <i>atpE</i> | 38.80% | 0.01535 | 0.0198 | 0.0188 | <b>1.1224</b> | 16           | 1            |
| <i>atpF</i> | 39.00% | 0.00886 | 0.0061 | 0.0271 | 0.2300        |              |              |
| <i>atpH</i> | 44.60% | 0.00311 | 0.0000 | 0.0217 | 0.0000        |              |              |
| <i>atpI</i> | 38.30% | 0.00600 | 0.0018 | 0.0225 | 0.0863        |              |              |
| <i>ccsA</i> | 31.30% | 0.00532 | 0.0053 | 0.0103 | <b>0.5912</b> |              |              |
| <i>cemA</i> | 33.40% | 0.00524 | 0.0037 | 0.0222 | 0.1802        |              |              |
| <i>clpP</i> | 42.00% | 0.00276 | 0.0000 | 0.0141 | 0.0000        |              |              |
| <i>infA</i> | 36.10% | 0.00616 | 0.0057 | 0.0211 | 0.2855        |              |              |
| <i>matK</i> | 32.90% | 0.01252 | 0.0123 | 0.0238 | <b>0.6661</b> | 2            |              |
| <i>ndhA</i> | 34.80% | 0.00875 | 0.0021 | 0.0380 | 0.0581        |              |              |
| <i>ndhB</i> | 37.30% | 0.00058 | 0.0000 | 0.0034 | 0.0000        |              |              |
| <i>ndhC</i> | 35.50% | 0.00259 | 0.0000 | 0.0151 | 0.0000        |              |              |
| <i>ndhD</i> | 35.60% | 0.00655 | 0.0044 | 0.0210 | 0.2745        |              |              |
| <i>ndhE</i> | 33.50% | 0.00455 | 0.0000 | 0.0262 | 0.0000        |              |              |
| <i>ndhF</i> | 32.10% | 0.00820 | 0.0066 | 0.0203 | 0.3390        |              |              |
| <i>ndhG</i> | 36.50% | 0.00623 | 0.0051 | 0.0334 | 0.1544        |              |              |
| <i>ndhH</i> | 38.40% | 0.00611 | 0.0014 | 0.0272 | 0.0565        |              |              |
| <i>ndhI</i> | 35.80% | 0.00834 | 0.0030 | 0.0342 | 0.0946        |              |              |
| <i>ndhJ</i> | 40.00% | 0.00159 | 0.0027 | 0.0094 | 0.2872        |              |              |
| <i>ndhK</i> | 38.70% | 0.00626 | 0.0020 | 0.0324 | 0.0678        |              |              |
| <i>petA</i> | 40.20% | 0.00632 | 0.0043 | 0.0201 | 0.2379        |              |              |
| <i>petB</i> | 39.40% | 0.00258 | 0.0041 | 0.0107 | 0.4745        |              |              |



|              |        |         |        |        |               |   |   |
|--------------|--------|---------|--------|--------|---------------|---|---|
| <i>petD</i>  | 39.30% | 0.00694 | 0.0028 | 0.0335 | 0.0874        |   |   |
| <i>petG</i>  | 34.60% | 0.00501 | 0.0000 | 0.0375 | 0.0000        |   |   |
| <i>petL</i>  | 34.90% | 0.00980 | 0.0149 | 0.0408 | 0.3652        |   |   |
| <i>petN</i>  | 42.70% | 0.01149 | 0.0000 | 0.0682 | 0.0000        |   |   |
| <i>psaA</i>  | 42.20% | 0.00423 | 0.0008 | 0.0200 | 0.0511        |   |   |
| <i>psaB</i>  | 41.30% | 0.00307 | 0.0008 | 0.0137 | 0.0622        |   |   |
| <i>psaC</i>  | 42.80% | 0.00192 | 0.0000 | 0.0179 | 0.0000        |   |   |
| <i>psaI</i>  | 39.80% | 0.00617 | 0.0162 | 0.0000 | /             |   |   |
| <i>psbA</i>  | 42.10% | 0.00235 | 0.0012 | 0.0081 | 0.1481        |   |   |
| <i>psbB</i>  | 42.90% | 0.00631 | 0.0020 | 0.0262 | 0.1060        |   |   |
| <i>psbC</i>  | 43.10% | 0.00287 | 0.0009 | 0.0099 | 0.1366        |   |   |
| <i>psbD</i>  | 42.40% | 0.00237 | 0.0000 | 0.0124 | 0.0000        |   |   |
| <i>psbE</i>  | 40.20% | 0.00509 | 0.0000 | 0.0287 | 0.0000        |   |   |
| <i>psbF</i>  | 43.10% | 0.00399 | 0.0000 | 0.0328 | 0.0000        |   |   |
| <i>psbH</i>  | 37.30% | 0.00842 | 0.0141 | 0.0223 | <b>0.6754</b> |   |   |
| <i>psbI</i>  | 35.80% | 0.00432 | 0.0000 | 0.0385 | 0.0000        |   |   |
| <i>psbJ</i>  | 37.20% | 0.00296 | 0.0000 | 0.0309 | 0.0000        |   |   |
| <i>psbK</i>  | 38.50% | 0.00364 | 0.0000 | 0.0273 | 0.0000        |   |   |
| <i>psbL</i>  | 34.90% | 0.00312 | 0.0000 | 0.0423 | 0.0000        |   |   |
| <i>psbN</i>  | 43.80% | 0.00276 | 0.0000 | 0.0321 | 0.0000        |   |   |
| <i>psbT</i>  | 31.30% | 0.00202 | 0.0000 | 0.0445 | 0.0000        |   |   |
| <i>psbZ</i>  | 36.30% | 0.00358 | 0.0000 | 0.0242 | 0.0000        |   |   |
| <i>rbcL</i>  | 44.10% | 0.00947 | 0.0069 | 0.0238 | 0.3153        |   |   |
| <i>rpl14</i> | 40.80% | 0.00771 | 0.0036 | 0.0484 | 0.0796        |   |   |
| <i>rpl16</i> | 40.20% | 0.00790 | 0.0057 | 0.0254 | 0.3765        | 8 |   |
| <i>rpl2</i>  | 44.60% | 0.00057 | 0.0016 | 0.0000 | /             |   |   |
| <i>rpl20</i> | 34.90% | 0.00419 | 0.0054 | 0.0128 | 0.4623        | 1 |   |
| <i>rpl22</i> | 33.70% | 0.01147 | 0.0083 | 0.0328 | 0.2833        |   |   |
| <i>rpl23</i> | 38.30% | 0.00072 | 0.0047 | 0.0000 | /             |   |   |
| <i>rpl32</i> | 36.00% | 0.00850 | 0.0000 | 0.0532 | 0.0000        |   |   |
| <i>rpl33</i> | 38.20% | 0.00707 | 0.0066 | 0.0447 | 0.1477        |   |   |
| <i>rpoA</i>  | 35.20% | 0.00825 | 0.0090 | 0.0139 | <b>0.8929</b> | 8 | 4 |
| <i>rpoB</i>  | 39.20% | 0.00402 | 0.0014 | 0.0167 | 0.0975        |   |   |
| <i>rpoC1</i> | 38.80% | 0.00521 | 0.0026 | 0.0181 | 0.1763        |   |   |
| <i>rpoC2</i> | 38.10% | 0.00566 | 0.0037 | 0.0169 | 0.2125        |   |   |
| <i>rps11</i> | 46.70% | 0.00381 | 0.0033 | 0.0224 | 0.1693        |   |   |
| <i>rps14</i> | 42.50% | 0.00185 | 0.0000 | 0.0161 | 0.0000        |   |   |
| <i>rps15</i> | 30.60% | 0.00982 | 0.0072 | 0.0423 | 0.1881        |   |   |
| <i>rps16</i> | 39.70% | 0.00902 | 0.0083 | 0.0235 | 0.4144        | 2 |   |
| <i>rps18</i> | 34.90% | 0.00271 | 0.0043 | 0.0144 | 0.2986        |   |   |
| <i>rps19</i> | 35.70% | 0.00258 | 0.0047 | 0.0159 | 0.2956        |   |   |
| <i>rps2</i>  | 37.60% | 0.00439 | 0.0020 | 0.0206 | 0.1302        |   |   |
| <i>rps3</i>  | 34.50% | 0.00501 | 0.0030 | 0.0176 | 0.2420        |   |   |

|              |        |         |        |        |               |   |
|--------------|--------|---------|--------|--------|---------------|---|
| <i>rps4</i>  | 39.50% | 0.00232 | 0.0000 | 0.0125 | 0.0000        |   |
| <i>rps8</i>  | 34.00% | 0.00591 | 0.0053 | 0.0156 | 0.4131        |   |
| <i>ycf15</i> | 37.70% | 0.00100 | 0.0063 | 0.0000 | /             |   |
| <i>ycf1a</i> | 29.70% | 0.01730 | 0.0164 | 0.0289 | <b>0.5863</b> |   |
| <i>ycf1b</i> | 35.30% | 0.00576 | 0.0077 | 0.0092 | <b>0.9838</b> | 6 |
| <i>ycf2</i>  | 38.00% | 0.00267 | 0.0029 | 0.0041 | <b>0.7260</b> |   |
| <i>ycf3</i>  | 39.50% | 0.00362 | 0.0000 | 0.0218 | 0.0000        |   |
| <i>ycf4</i>  | 40.70% | 0.00334 | 0.0024 | 0.0134 | 0.2270        |   |

**Table S6. Details for the Ka and Ks values of four protein-coding sequences (*psaI*, *rpl2*, *rpl23*, *ycf15*) with Ks = 0.**

### 1. Ka and Ks of *psaI*

| Seq 1                                                    | Seq 2                                                    | Ka     | Ks |
|----------------------------------------------------------|----------------------------------------------------------|--------|----|
| <i>Hyrocotyle dielsiana</i>                              | <i>Hyrocotyle leucocephala</i>                           | 0.025  | 0  |
| <i>Hydrocotyle hookeri</i> subsp. <i>chinensis</i>       | <i>Hyrocotyle leucocephala</i>                           | 0.025  | 0  |
| <i>Hyrocotyle leucocephala</i>                           | <i>Hyrocotyle nepalensis</i>                             | 0.025  | 0  |
| <i>Hyrocotyle leucocephala</i>                           | <i>Hydrocotyle pseudoconferta</i>                        | 0.025  | 0  |
| <i>Hyrocotyle leucocephala</i>                           | <i>Hydrocotyle sibthorpioides</i>                        | 0.025  | 0  |
| <i>Hyrocotyle leucocephala</i>                           | <i>Hydrocotyle sibthorpioides</i> _NC_035502             | 0.025  | 0  |
| <i>Hyrocotyle leucocephala</i>                           | <i>Hydrocotyle sibthorpioides</i> var. <i>batrachium</i> | 0.025  | 0  |
| <i>Hyrocotyle leucocephala</i>                           | <i>Hyrocotyle verticillata</i>                           | 0.0124 | 0  |
| <i>Hyrocotyle leucocephala</i>                           | <i>Hyrocotyle verticillata</i> _NC_015818                | 0.0124 | 0  |
| <i>Hyrocotyle dielsiana</i>                              | <i>Hyrocotyle verticillata</i>                           | 0.0123 | 0  |
| <i>Hyrocotyle dielsiana</i>                              | <i>Hyrocotyle verticillata</i> _NC_015818                | 0.0123 | 0  |
| <i>Hydrocotyle hookeri</i> subsp. <i>chinensis</i>       | <i>Hyrocotyle verticillata</i>                           | 0.0123 | 0  |
| <i>Hydrocotyle hookeri</i> subsp. <i>chinensis</i>       | <i>Hyrocotyle verticillata</i> _NC_015818                | 0.0123 | 0  |
| <i>Hyrocotyle nepalensis</i>                             | <i>Hyrocotyle verticillata</i>                           | 0.0123 | 0  |
| <i>Hyrocotyle nepalensis</i>                             | <i>Hyrocotyle verticillata</i> _NC_015818                | 0.0123 | 0  |
| <i>Hydrocotyle pseudoconferta</i>                        | <i>Hyrocotyle verticillata</i>                           | 0.0123 | 0  |
| <i>Hydrocotyle pseudoconferta</i>                        | <i>Hyrocotyle verticillata</i> _NC_015818                | 0.0123 | 0  |
| <i>Hydrocotyle sibthorpioides</i>                        | <i>Hyrocotyle verticillata</i>                           | 0.0123 | 0  |
| <i>Hydrocotyle sibthorpioides</i>                        | <i>Hyrocotyle verticillata</i> _NC_015818                | 0.0123 | 0  |
| <i>Hydrocotyle sibthorpioides</i> _NC_035502             | <i>Hyrocotyle verticillata</i>                           | 0.0123 | 0  |
| <i>Hydrocotyle sibthorpioides</i> _NC_035502             | <i>Hyrocotyle verticillata</i> _NC_015818                | 0.0123 | 0  |
| <i>Hydrocotyle sibthorpioides</i> var. <i>batrachium</i> | <i>Hyrocotyle verticillata</i>                           | 0.0123 | 0  |
| <i>Hydrocotyle sibthorpioides</i> var. <i>batrachium</i> | <i>Hyrocotyle verticillata</i> _NC_015818                | 0.0123 | 0  |
| <i>Hyrocotyle dielsiana</i>                              | <i>Hydrocotyle hookeri</i> subsp. <i>chinensis</i>       | 0      | 0  |
| <i>Hyrocotyle dielsiana</i>                              | <i>Hyrocotyle nepalensis</i>                             | 0      | 0  |
| <i>Hyrocotyle dielsiana</i>                              | <i>Hydrocotyle pseudoconferta</i>                        | 0      | 0  |
| <i>Hyrocotyle dielsiana</i>                              | <i>Hydrocotyle sibthorpioides</i>                        | 0      | 0  |
| <i>Hyrocotyle dielsiana</i>                              | <i>Hydrocotyle sibthorpioides</i> _NC_035502             | 0      | 0  |
| <i>Hyrocotyle dielsiana</i>                              | <i>Hydrocotyle sibthorpioides</i> var. <i>batrachium</i> | 0      | 0  |
| <i>Hydrocotyle hookeri</i> subsp. <i>chinensis</i>       | <i>Hyrocotyle nepalensis</i>                             | 0      | 0  |
| <i>Hydrocotyle hookeri</i> subsp. <i>chinensis</i>       | <i>Hydrocotyle pseudoconferta</i>                        | 0      | 0  |
| <i>Hydrocotyle hookeri</i> subsp. <i>chinensis</i>       | <i>Hydrocotyle sibthorpioides</i>                        | 0      | 0  |
| <i>Hydrocotyle hookeri</i> subsp. <i>chinensis</i>       | <i>Hydrocotyle sibthorpioides</i> _NC_035502             | 0      | 0  |
| <i>Hydrocotyle hookeri</i> subsp. <i>chinensis</i>       | <i>Hydrocotyle sibthorpioides</i> var. <i>batrachium</i> | 0      | 0  |
| <i>Hyrocotyle nepalensis</i>                             | <i>Hydrocotyle pseudoconferta</i>                        | 0      | 0  |
| <i>Hyrocotyle nepalensis</i>                             | <i>Hydrocotyle sibthorpioides</i>                        | 0      | 0  |
| <i>Hyrocotyle nepalensis</i>                             | <i>Hydrocotyle sibthorpioides</i> _NC_035502             | 0      | 0  |

|                                              |                                                          |   |   |
|----------------------------------------------|----------------------------------------------------------|---|---|
| <i>Hydrocotyle nepalensis</i>                | <i>Hydrocotyle sibthorpioides</i> var. <i>batrachium</i> | 0 | 0 |
| <i>Hydrocotyle pseudoconferta</i>            | <i>Hydrocotyle sibthorpioides</i>                        | 0 | 0 |
| <i>Hydrocotyle pseudoconferta</i>            | <i>Hydrocotyle sibthorpioides</i> _NC_035502             | 0 | 0 |
| <i>Hydrocotyle pseudoconferta</i>            | <i>Hydrocotyle sibthorpioides</i> var. <i>batrachium</i> | 0 | 0 |
| <i>Hydrocotyle sibthorpioides</i>            | <i>Hydrocotyle sibthorpioides</i> _NC_035502             | 0 | 0 |
| <i>Hydrocotyle sibthorpioides</i>            | <i>Hydrocotyle sibthorpioides</i> var. <i>batrachium</i> | 0 | 0 |
| <i>Hydrocotyle sibthorpioides</i> _NC_035502 | <i>Hydrocotyle sibthorpioides</i> var. <i>batrachium</i> | 0 | 0 |
| <i>Hydrocotyle verticillata</i>              | <i>Hydrocotyle verticillata</i> _NC_015818               | 0 | 0 |

## 2. Ka and Ks of *rpl2*

| Seq 1                                                    | Seq 2                                                    | Ka     | Ks |
|----------------------------------------------------------|----------------------------------------------------------|--------|----|
| <i>Hydrocotyle dielsiana</i>                             | <i>Hydrocotyle sibthorpioides</i>                        | 0.0016 | 0  |
| <i>Hydrocotyle dielsiana</i>                             | <i>Hydrocotyle sibthorpioides</i> _NC_035502             | 0.0016 | 0  |
| <i>Hydrocotyle dielsiana</i>                             | <i>Hydrocotyle sibthorpioides</i> var. <i>batrachium</i> | 0.0016 | 0  |
| <i>Hydrocotyle hookeri</i> subsp. <i>chinensis</i>       | <i>Hydrocotyle sibthorpioides</i>                        | 0.0016 | 0  |
| <i>Hydrocotyle hookeri</i> subsp. <i>chinensis</i>       | <i>Hydrocotyle sibthorpioides</i> _NC_035502             | 0.0016 | 0  |
| <i>Hydrocotyle hookeri</i> subsp. <i>chinensis</i>       | <i>Hydrocotyle sibthorpioides</i> var. <i>batrachium</i> | 0.0016 | 0  |
| <i>Hydrocotyle leucocephala</i>                          | <i>Hydrocotyle sibthorpioides</i>                        | 0.0016 | 0  |
| <i>Hydrocotyle leucocephala</i>                          | <i>Hydrocotyle sibthorpioides</i> _NC_035502             | 0.0016 | 0  |
| <i>Hydrocotyle leucocephala</i>                          | <i>Hydrocotyle sibthorpioides</i> var. <i>batrachium</i> | 0.0016 | 0  |
| <i>Hydrocotyle nepalensis</i>                            | <i>Hydrocotyle sibthorpioides</i>                        | 0.0016 | 0  |
| <i>Hydrocotyle nepalensis</i>                            | <i>Hydrocotyle sibthorpioides</i> _NC_035502             | 0.0016 | 0  |
| <i>Hydrocotyle nepalensis</i>                            | <i>Hydrocotyle sibthorpioides</i> var. <i>batrachium</i> | 0.0016 | 0  |
| <i>Hydrocotyle pseudoconferta</i>                        | <i>Hydrocotyle sibthorpioides</i>                        | 0.0016 | 0  |
| <i>Hydrocotyle pseudoconferta</i>                        | <i>Hydrocotyle sibthorpioides</i> _NC_035502             | 0.0016 | 0  |
| <i>Hydrocotyle pseudoconferta</i>                        | <i>Hydrocotyle sibthorpioides</i> var. <i>batrachium</i> | 0.0016 | 0  |
| <i>Hydrocotyle sibthorpioides</i>                        | <i>Hydrocotyle verticillata</i>                          | 0.0016 | 0  |
| <i>Hydrocotyle sibthorpioides</i>                        | <i>Hydrocotyle verticillata</i> _NC_015818               | 0.0016 | 0  |
| <i>Hydrocotyle sibthorpioides</i> _NC_035502             | <i>Hydrocotyle verticillata</i>                          | 0.0016 | 0  |
| <i>Hydrocotyle sibthorpioides</i> _NC_035502             | <i>Hydrocotyle verticillata</i> _NC_015818               | 0.0016 | 0  |
| <i>Hydrocotyle sibthorpioides</i> var. <i>batrachium</i> | <i>Hydrocotyle verticillata</i>                          | 0.0016 | 0  |
| <i>Hydrocotyle sibthorpioides</i> var. <i>batrachium</i> | <i>Hydrocotyle verticillata</i> _NC_015818               | 0.0016 | 0  |
| <i>Hydrocotyle dielsiana</i>                             | <i>Hydrocotyle hookeri</i> subsp. <i>chinensis</i>       | 0      | 0  |
| <i>Hydrocotyle dielsiana</i>                             | <i>Hydrocotyle leucocephala</i>                          | 0      | 0  |
| <i>Hydrocotyle dielsiana</i>                             | <i>Hydrocotyle nepalensis</i>                            | 0      | 0  |
| <i>Hydrocotyle dielsiana</i>                             | <i>Hydrocotyle pseudoconferta</i>                        | 0      | 0  |
| <i>Hydrocotyle dielsiana</i>                             | <i>Hydrocotyle verticillata</i>                          | 0      | 0  |
| <i>Hydrocotyle dielsiana</i>                             | <i>Hydrocotyle verticillata</i> _NC_015818               | 0      | 0  |
| <i>Hydrocotyle hookeri</i> subsp. <i>chinensis</i>       | <i>Hydrocotyle leucocephala</i>                          | 0      | 0  |
| <i>Hydrocotyle hookeri</i> subsp. <i>chinensis</i>       | <i>Hydrocotyle nepalensis</i>                            | 0      | 0  |
| <i>Hydrocotyle hookeri</i> subsp. <i>chinensis</i>       | <i>Hydrocotyle pseudoconferta</i>                        | 0      | 0  |
| <i>Hydrocotyle hookeri</i> subsp. <i>chinensis</i>       | <i>Hydrocotyle verticillata</i>                          | 0      | 0  |
| <i>Hydrocotyle hookeri</i> subsp. <i>chinensis</i>       | <i>Hydrocotyle verticillata</i> _NC_015818               | 0      | 0  |
| <i>Hydrocotyle leucocephala</i>                          | <i>Hydrocotyle nepalensis</i>                            | 0      | 0  |
| <i>Hydrocotyle leucocephala</i>                          | <i>Hydrocotyle pseudoconferta</i>                        | 0      | 0  |
| <i>Hydrocotyle leucocephala</i>                          | <i>Hydrocotyle verticillata</i>                          | 0      | 0  |
| <i>Hydrocotyle leucocephala</i>                          | <i>Hydrocotyle verticillata</i> _NC_015818               | 0      | 0  |
| <i>Hydrocotyle nepalensis</i>                            | <i>Hydrocotyle pseudoconferta</i>                        | 0      | 0  |
| <i>Hydrocotyle nepalensis</i>                            | <i>Hydrocotyle verticillata</i>                          | 0      | 0  |
| <i>Hydrocotyle nepalensis</i>                            | <i>Hydrocotyle verticillata</i> _NC_015818               | 0      | 0  |

|                                             |                                                   |   |   |
|---------------------------------------------|---------------------------------------------------|---|---|
| <i>Hydrocotyle pseudoconferta</i>           | <i>Hydrocotyle verticillata</i>                   | 0 | 0 |
| <i>Hydrocotyle pseudoconferta</i>           | <i>Hydrocotyle verticillata_NC_015818</i>         | 0 | 0 |
| <i>Hydrocotyle sibthorpioides</i>           | <i>Hydrocotyle sibthorpioides_NC_035502</i>       | 0 | 0 |
| <i>Hydrocotyle sibthorpioides</i>           | <i>Hydrocotyle sibthorpioides var. batrachium</i> | 0 | 0 |
| <i>Hydrocotyle sibthorpioides_NC_035502</i> | <i>Hydrocotyle sibthorpioides var. batrachium</i> | 0 | 0 |
| <i>Hydrocotyle verticillata</i>             | <i>Hydrocotyle verticillata_NC_015818</i>         | 0 | 0 |

### 3. Ka and Ks of *rpl23*

| Seq 1                                              | Seq 2                                              | Ka     | Ks |
|----------------------------------------------------|----------------------------------------------------|--------|----|
| <i>Hydrocotyle dielsiana</i>                       | <i>Hydrocotyle leucocephala</i>                    | 0.0047 | 0  |
| <i>Hydrocotyle hookeri</i> subsp. <i>chinensis</i> | <i>Hydrocotyle leucocephala</i>                    | 0.0047 | 0  |
| <i>Hydrocotyle leucocephala</i>                    | <i>Hydrocotyle nepalensis</i>                      | 0.0047 | 0  |
| <i>Hydrocotyle leucocephala</i>                    | <i>Hydrocotyle pseudoconferta</i>                  | 0.0047 | 0  |
| <i>Hydrocotyle leucocephala</i>                    | <i>Hydrocotyle sibthorpioides</i>                  | 0.0047 | 0  |
| <i>Hydrocotyle leucocephala</i>                    | <i>Hydrocotyle sibthorpioides_NC_035502</i>        | 0.0047 | 0  |
| <i>Hydrocotyle leucocephala</i>                    | <i>Hydrocotyle sibthorpioides var. batrachium</i>  | 0.0047 | 0  |
| <i>Hydrocotyle leucocephala</i>                    | <i>Hydrocotyle verticillata</i>                    | 0.0047 | 0  |
| <i>Hydrocotyle leucocephala</i>                    | <i>Hydrocotyle verticillata_NC_015818</i>          | 0.0047 | 0  |
| <i>Hydrocotyle dielsiana</i>                       | <i>Hydrocotyle hookeri</i> subsp. <i>chinensis</i> | 0      | 0  |
| <i>Hydrocotyle dielsiana</i>                       | <i>Hydrocotyle nepalensis</i>                      | 0      | 0  |
| <i>Hydrocotyle dielsiana</i>                       | <i>Hydrocotyle pseudoconferta</i>                  | 0      | 0  |
| <i>Hydrocotyle dielsiana</i>                       | <i>Hydrocotyle sibthorpioides</i>                  | 0      | 0  |
| <i>Hydrocotyle dielsiana</i>                       | <i>Hydrocotyle sibthorpioides_NC_035502</i>        | 0      | 0  |
| <i>Hydrocotyle dielsiana</i>                       | <i>Hydrocotyle sibthorpioides var. batrachium</i>  | 0      | 0  |
| <i>Hydrocotyle dielsiana</i>                       | <i>Hydrocotyle verticillata</i>                    | 0      | 0  |
| <i>Hydrocotyle dielsiana</i>                       | <i>Hydrocotyle verticillata_NC_015818</i>          | 0      | 0  |
| <i>Hydrocotyle hookeri</i> subsp. <i>chinensis</i> | <i>Hydrocotyle nepalensis</i>                      | 0      | 0  |
| <i>Hydrocotyle hookeri</i> subsp. <i>chinensis</i> | <i>Hydrocotyle pseudoconferta</i>                  | 0      | 0  |
| <i>Hydrocotyle hookeri</i> subsp. <i>chinensis</i> | <i>Hydrocotyle sibthorpioides</i>                  | 0      | 0  |
| <i>Hydrocotyle hookeri</i> subsp. <i>chinensis</i> | <i>Hydrocotyle sibthorpioides_NC_035502</i>        | 0      | 0  |
| <i>Hydrocotyle hookeri</i> subsp. <i>chinensis</i> | <i>Hydrocotyle sibthorpioides var. batrachium</i>  | 0      | 0  |
| <i>Hydrocotyle hookeri</i> subsp. <i>chinensis</i> | <i>Hydrocotyle verticillata</i>                    | 0      | 0  |
| <i>Hydrocotyle hookeri</i> subsp. <i>chinensis</i> | <i>Hydrocotyle verticillata_NC_015818</i>          | 0      | 0  |
| <i>Hydrocotyle nepalensis</i>                      | <i>Hydrocotyle pseudoconferta</i>                  | 0      | 0  |
| <i>Hydrocotyle nepalensis</i>                      | <i>Hydrocotyle sibthorpioides</i>                  | 0      | 0  |
| <i>Hydrocotyle nepalensis</i>                      | <i>Hydrocotyle sibthorpioides_NC_035502</i>        | 0      | 0  |
| <i>Hydrocotyle nepalensis</i>                      | <i>Hydrocotyle sibthorpioides var. batrachium</i>  | 0      | 0  |
| <i>Hydrocotyle nepalensis</i>                      | <i>Hydrocotyle verticillata</i>                    | 0      | 0  |
| <i>Hydrocotyle nepalensis</i>                      | <i>Hydrocotyle verticillata_NC_015818</i>          | 0      | 0  |
| <i>Hydrocotyle pseudoconferta</i>                  | <i>Hydrocotyle sibthorpioides</i>                  | 0      | 0  |
| <i>Hydrocotyle pseudoconferta</i>                  | <i>Hydrocotyle sibthorpioides_NC_035502</i>        | 0      | 0  |
| <i>Hydrocotyle pseudoconferta</i>                  | <i>Hydrocotyle sibthorpioides var. batrachium</i>  | 0      | 0  |
| <i>Hydrocotyle pseudoconferta</i>                  | <i>Hydrocotyle verticillata</i>                    | 0      | 0  |
| <i>Hydrocotyle pseudoconferta</i>                  | <i>Hydrocotyle verticillata_NC_015818</i>          | 0      | 0  |
| <i>Hydrocotyle sibthorpioides</i>                  | <i>Hydrocotyle sibthorpioides_NC_035502</i>        | 0      | 0  |
| <i>Hydrocotyle sibthorpioides</i>                  | <i>Hydrocotyle sibthorpioides var. batrachium</i>  | 0      | 0  |
| <i>Hydrocotyle sibthorpioides</i>                  | <i>Hydrocotyle verticillata</i>                    | 0      | 0  |
| <i>Hydrocotyle sibthorpioides</i>                  | <i>Hydrocotyle verticillata_NC_015818</i>          | 0      | 0  |
| <i>Hydrocotyle sibthorpioides_NC_035502</i>        | <i>Hydrocotyle sibthorpioides var. batrachium</i>  | 0      | 0  |
| <i>Hydrocotyle sibthorpioides_NC_035502</i>        | <i>Hydrocotyle verticillata</i>                    | 0      | 0  |

|                                                          |                                           |   |   |
|----------------------------------------------------------|-------------------------------------------|---|---|
| <i>Hydrocotyle sibthorpioides_NC_035502</i>              | <i>Hydrocotyle verticillata_NC_015818</i> | 0 | 0 |
| <i>Hydrocotyle sibthorpioides</i> var. <i>batrachium</i> | <i>Hydrocotyle verticillata</i>           | 0 | 0 |
| <i>Hydrocotyle sibthorpioides</i> var. <i>batrachium</i> | <i>Hydrocotyle verticillata_NC_015818</i> | 0 | 0 |
| <i>Hydrocotyle verticillata</i>                          | <i>Hydrocotyle verticillata_NC_015818</i> | 0 | 0 |

#### 4. Ka and Ks of *ycf15*

| Seq 1                                                    | Seq 2                                                    | Ka     | Ks |
|----------------------------------------------------------|----------------------------------------------------------|--------|----|
| <i>Hydrocotyle dielsiana</i>                             | <i>Hydrocotyle verticillata</i>                          | 0.0063 | 0  |
| <i>Hydrocotyle hookeri</i> subsp. <i>chinensis</i>       | <i>Hydrocotyle verticillata</i>                          | 0.0063 | 0  |
| <i>Hydrocotyle leucocephala</i>                          | <i>Hydrocotyle verticillata</i>                          | 0.0063 | 0  |
| <i>Hydrocotyle nepalensis</i>                            | <i>Hydrocotyle verticillata</i>                          | 0.0063 | 0  |
| <i>Hydrocotyle pseudoconferta</i>                        | <i>Hydrocotyle verticillata</i>                          | 0.0063 | 0  |
| <i>Hydrocotyle sibthorpioides_NC_035502</i>              | <i>Hydrocotyle verticillata</i>                          | 0.0063 | 0  |
| <i>Hydrocotyle sibthorpioides</i> var. <i>batrachium</i> | <i>Hydrocotyle verticillata</i>                          | 0.0063 | 0  |
| <i>Hydrocotyle sibthorpioides</i>                        | <i>Hydrocotyle verticillata</i>                          | 0.0063 | 0  |
| <i>Hydrocotyle verticillata_NC_015818</i>                | <i>Hydrocotyle verticillata</i>                          | 0.0063 | 0  |
| <i>Hydrocotyle dielsiana</i>                             | <i>Hydrocotyle hookeri</i> subsp. <i>chinensis</i>       | 0      | 0  |
| <i>Hydrocotyle dielsiana</i>                             | <i>Hydrocotyle leucocephala</i>                          | 0      | 0  |
| <i>Hydrocotyle dielsiana</i>                             | <i>Hydrocotyle nepalensis</i>                            | 0      | 0  |
| <i>Hydrocotyle dielsiana</i>                             | <i>Hydrocotyle pseudoconferta</i>                        | 0      | 0  |
| <i>Hydrocotyle dielsiana</i>                             | <i>Hydrocotyle sibthorpioides_NC_035502</i>              | 0      | 0  |
| <i>Hydrocotyle dielsiana</i>                             | <i>Hydrocotyle sibthorpioides</i> var. <i>batrachium</i> | 0      | 0  |
| <i>Hydrocotyle dielsiana</i>                             | <i>Hydrocotyle sibthorpioides</i>                        | 0      | 0  |
| <i>Hydrocotyle dielsiana</i>                             | <i>Hydrocotyle verticillata_NC_015818</i>                | 0      | 0  |
| <i>Hydrocotyle hookeri</i> subsp. <i>chinensis</i>       | <i>Hydrocotyle leucocephala</i>                          | 0      | 0  |
| <i>Hydrocotyle hookeri</i> subsp. <i>chinensis</i>       | <i>Hydrocotyle nepalensis</i>                            | 0      | 0  |
| <i>Hydrocotyle hookeri</i> subsp. <i>chinensis</i>       | <i>Hydrocotyle pseudoconferta</i>                        | 0      | 0  |
| <i>Hydrocotyle hookeri</i> subsp. <i>chinensis</i>       | <i>Hydrocotyle sibthorpioides_NC_035502</i>              | 0      | 0  |
| <i>Hydrocotyle hookeri</i> subsp. <i>chinensis</i>       | <i>Hydrocotyle sibthorpioides</i> var. <i>batrachium</i> | 0      | 0  |
| <i>Hydrocotyle hookeri</i> subsp. <i>chinensis</i>       | <i>Hydrocotyle sibthorpioides</i>                        | 0      | 0  |
| <i>Hydrocotyle hookeri</i> subsp. <i>chinensis</i>       | <i>Hydrocotyle verticillata_NC_015818</i>                | 0      | 0  |
| <i>Hydrocotyle leucocephala</i>                          | <i>Hydrocotyle nepalensis</i>                            | 0      | 0  |
| <i>Hydrocotyle leucocephala</i>                          | <i>Hydrocotyle pseudoconferta</i>                        | 0      | 0  |
| <i>Hydrocotyle leucocephala</i>                          | <i>Hydrocotyle sibthorpioides_NC_035502</i>              | 0      | 0  |
| <i>Hydrocotyle leucocephala</i>                          | <i>Hydrocotyle sibthorpioides</i> var. <i>batrachium</i> | 0      | 0  |
| <i>Hydrocotyle leucocephala</i>                          | <i>Hydrocotyle sibthorpioides</i>                        | 0      | 0  |
| <i>Hydrocotyle leucocephala</i>                          | <i>Hydrocotyle verticillata_NC_015818</i>                | 0      | 0  |
| <i>Hydrocotyle nepalensis</i>                            | <i>Hydrocotyle pseudoconferta</i>                        | 0      | 0  |
| <i>Hydrocotyle nepalensis</i>                            | <i>Hydrocotyle sibthorpioides_NC_035502</i>              | 0      | 0  |
| <i>Hydrocotyle nepalensis</i>                            | <i>Hydrocotyle sibthorpioides</i> var. <i>batrachium</i> | 0      | 0  |
| <i>Hydrocotyle nepalensis</i>                            | <i>Hydrocotyle sibthorpioides</i>                        | 0      | 0  |
| <i>Hydrocotyle nepalensis</i>                            | <i>Hydrocotyle verticillata_NC_015818</i>                | 0      | 0  |
| <i>Hydrocotyle pseudoconferta</i>                        | <i>Hydrocotyle sibthorpioides_NC_035502</i>              | 0      | 0  |
| <i>Hydrocotyle pseudoconferta</i>                        | <i>Hydrocotyle sibthorpioides</i> var. <i>batrachium</i> | 0      | 0  |
| <i>Hydrocotyle pseudoconferta</i>                        | <i>Hydrocotyle sibthorpioides</i>                        | 0      | 0  |
| <i>Hydrocotyle pseudoconferta</i>                        | <i>Hydrocotyle verticillata_NC_015818</i>                | 0      | 0  |
| <i>Hydrocotyle sibthorpioides_NC_035502</i>              | <i>Hydrocotyle sibthorpioides</i> var. <i>batrachium</i> | 0      | 0  |
| <i>Hydrocotyle sibthorpioides_NC_035502</i>              | <i>Hydrocotyle sibthorpioides</i>                        | 0      | 0  |
| <i>Hydrocotyle sibthorpioides_NC_035502</i>              | <i>Hydrocotyle verticillata_NC_015818</i>                | 0      | 0  |
| <i>Hydrocotyle sibthorpioides</i> var. <i>batrachium</i> | <i>Hydrocotyle sibthorpioides</i>                        | 0      | 0  |

|                                                          |                                            |   |   |
|----------------------------------------------------------|--------------------------------------------|---|---|
| <i>Hydrocotyle sibthorpioides</i> var. <i>batrachium</i> | <i>Hydrocotyle verticillata</i> _NC_015818 | 0 | 0 |
| <i>Hydrocotyle sibthorpioides</i>                        | <i>Hydrocotyle verticillata</i> _NC_015818 | 0 | 0 |

**Table S7. Details for the Ka and Ks values of eight protein-coding sequences (*atpE*, *ccsA*, *matK*, *psbH*, *rpoA*, *ycf1a*, *ycf1b*, *ycf2*) with Ka/Ks ( $\omega$ ) >0.5.**

### 1. Ka and Ks of *atpE*

| Seq 1                                                    | Seq 2                                                    | Ka     | Ks     |
|----------------------------------------------------------|----------------------------------------------------------|--------|--------|
| <i>Hydrocotyle dielsiana</i>                             | <i>Hydrocotyle hookeri</i> subsp. <i>chinensis</i>       | 0      | 0      |
| <i>Hydrocotyle dielsiana</i>                             | <i>Hydrocotyle leucocephala</i>                          | 0.0231 | 0      |
| <i>Hydrocotyle dielsiana</i>                             | <i>Hydrocotyle nepalensis</i>                            | 0      | 0      |
| <i>Hydrocotyle dielsiana</i>                             | <i>Hydrocotyle pseudoconferta</i>                        | 0      | 0      |
| <i>Hydrocotyle hookeri</i> subsp. <i>chinensis</i>       | <i>Hydrocotyle leucocephala</i>                          | 0.0231 | 0      |
| <i>Hydrocotyle hookeri</i> subsp. <i>chinensis</i>       | <i>Hydrocotyle nepalensis</i>                            | 0      | 0      |
| <i>Hydrocotyle hookeri</i> subsp. <i>chinensis</i>       | <i>Hydrocotyle pseudoconferta</i>                        | 0      | 0      |
| <i>Hydrocotyle leucocephala</i>                          | <i>Hydrocotyle nepalensis</i>                            | 0.0231 | 0      |
| <i>Hydrocotyle leucocephala</i>                          | <i>Hydrocotyle pseudoconferta</i>                        | 0.0231 | 0      |
| <i>Hydrocotyle nepalensis</i>                            | <i>Hydrocotyle pseudoconferta</i>                        | 0      | 0      |
| <i>Hydrocotyle sibthorpioides</i>                        | <i>Hydrocotyle sibthorpioides</i> _NC_035502             | 0      | 0      |
| <i>Hydrocotyle dielsiana</i>                             | <i>Hydrocotyle verticillata</i>                          | 0.0202 | 0.0094 |
| <i>Hydrocotyle hookeri</i> subsp. <i>chinensis</i>       | <i>Hydrocotyle verticillata</i>                          | 0.0202 | 0.0094 |
| <i>Hydrocotyle nepalensis</i>                            | <i>Hydrocotyle verticillata</i>                          | 0.0202 | 0.0094 |
| <i>Hydrocotyle pseudoconferta</i>                        | <i>Hydrocotyle verticillata</i>                          | 0.0202 | 0.0094 |
| <i>Hydrocotyle leucocephala</i>                          | <i>Hydrocotyle sibthorpioides</i>                        | 0.035  | 0.0188 |
| <i>Hydrocotyle leucocephala</i>                          | <i>Hydrocotyle sibthorpioides</i> _NC_035502             | 0.035  | 0.0188 |
| <i>Hydrocotyle leucocephala</i>                          | <i>Hydrocotyle sibthorpioides</i> var. <i>batrachium</i> | 0.0349 | 0.0189 |
| <i>Hydrocotyle dielsiana</i>                             | <i>Hydrocotyle verticillata</i> _NC_015818               | 0.0216 | 0.0141 |
| <i>Hydrocotyle hookeri</i> subsp. <i>chinensis</i>       | <i>Hydrocotyle verticillata</i> _NC_015818               | 0.0216 | 0.0141 |
| <i>Hydrocotyle nepalensis</i>                            | <i>Hydrocotyle verticillata</i> _NC_015818               | 0.0216 | 0.0141 |
| <i>Hydrocotyle pseudoconferta</i>                        | <i>Hydrocotyle verticillata</i> _NC_015818               | 0.0216 | 0.0141 |
| <i>Hydrocotyle sibthorpioides</i>                        | <i>Hydrocotyle verticillata</i>                          | 0.032  | 0.0285 |
| <i>Hydrocotyle sibthorpioides</i> _NC_035502             | <i>Hydrocotyle verticillata</i>                          | 0.032  | 0.0285 |
| <i>Hydrocotyle sibthorpioides</i> var. <i>batrachium</i> | <i>Hydrocotyle verticillata</i>                          | 0.0319 | 0.0286 |
| <i>Hydrocotyle sibthorpioides</i>                        | <i>Hydrocotyle verticillata</i> _NC_015818               | 0.0334 | 0.0333 |
| <i>Hydrocotyle sibthorpioides</i> _NC_035502             | <i>Hydrocotyle verticillata</i> _NC_015818               | 0.0334 | 0.0333 |
| <i>Hydrocotyle sibthorpioides</i> var. <i>batrachium</i> | <i>Hydrocotyle verticillata</i> _NC_015818               | 0.0334 | 0.0334 |
| <i>Hydrocotyle leucocephala</i>                          | <i>Hydrocotyle verticillata</i>                          | 0.0086 | 0.0093 |
| <i>Hydrocotyle dielsiana</i>                             | <i>Hydrocotyle sibthorpioides</i>                        | 0.0115 | 0.0189 |
| <i>Hydrocotyle dielsiana</i>                             | <i>Hydrocotyle sibthorpioides</i> _NC_035502             | 0.0115 | 0.0189 |
| <i>Hydrocotyle hookeri</i> subsp. <i>chinensis</i>       | <i>Hydrocotyle sibthorpioides</i>                        | 0.0115 | 0.0189 |
| <i>Hydrocotyle hookeri</i> subsp. <i>chinensis</i>       | <i>Hydrocotyle sibthorpioides</i> _NC_035502             | 0.0115 | 0.0189 |
| <i>Hydrocotyle nepalensis</i>                            | <i>Hydrocotyle sibthorpioides</i>                        | 0.0115 | 0.0189 |
| <i>Hydrocotyle nepalensis</i>                            | <i>Hydrocotyle sibthorpioides</i> _NC_035502             | 0.0115 | 0.0189 |
| <i>Hydrocotyle pseudoconferta</i>                        | <i>Hydrocotyle sibthorpioides</i>                        | 0.0115 | 0.0189 |
| <i>Hydrocotyle pseudoconferta</i>                        | <i>Hydrocotyle sibthorpioides</i> _NC_035502             | 0.0115 | 0.0189 |
| <i>Hydrocotyle verticillata</i>                          | <i>Hydrocotyle verticillata</i> _NC_015818               | 0.0057 | 0.0094 |
| <i>Hydrocotyle dielsiana</i>                             | <i>Hydrocotyle sibthorpioides</i> var. <i>batrachium</i> | 0.0114 | 0.019  |
| <i>Hydrocotyle hookeri</i> subsp. <i>chinensis</i>       | <i>Hydrocotyle sibthorpioides</i> var. <i>batrachium</i> | 0.0114 | 0.019  |
| <i>Hydrocotyle nepalensis</i>                            | <i>Hydrocotyle sibthorpioides</i> var. <i>batrachium</i> | 0.0114 | 0.019  |
| <i>Hydrocotyle pseudoconferta</i>                        | <i>Hydrocotyle sibthorpioides</i> var. <i>batrachium</i> | 0.0114 | 0.019  |

|                                              |                                                          |        |        |
|----------------------------------------------|----------------------------------------------------------|--------|--------|
| <i>Hydrocotyle leucocephala</i>              | <i>Hydrocotyle verticillata</i> _NC_015818               | 0.0086 | 0.0188 |
| <i>Hydrocotyle sibthorpioides</i>            | <i>Hydrocotyle sibthorpioides</i> var. <i>batrachium</i> | 0      | 0.019  |
| <i>Hydrocotyle sibthorpioides</i> _NC_035502 | <i>Hydrocotyle sibthorpioides</i> var. <i>batrachium</i> | 0      | 0.019  |

## 2. Ka and Ks of *ccsA*

| Seq 1                                                    | Seq 2                                                    | Ka     | Ks     |
|----------------------------------------------------------|----------------------------------------------------------|--------|--------|
| <i>Hydrocotyle dielsiana</i>                             | <i>Hydrocotyle hookeri</i> subsp. <i>chinensis</i>       | 0      | 0      |
| <i>Hydrocotyle dielsiana</i>                             | <i>Hydrocotyle nepalensis</i>                            | 0      | 0      |
| <i>Hydrocotyle hookeri</i> subsp. <i>chinensis</i>       | <i>Hydrocotyle nepalensis</i>                            | 0      | 0      |
| <i>Hydrocotyle sibthorpioides</i>                        | <i>Hydrocotyle sibthorpioides</i> _NC_035502             | 0      | 0      |
| <i>Hydrocotyle verticillata</i>                          | <i>Hydrocotyle verticillata</i> _NC_015818               | 0.0013 | 0      |
| <i>Hydrocotyle leucocephala</i>                          | <i>Hydrocotyle sibthorpioides</i>                        | 0.0081 | 0.0093 |
| <i>Hydrocotyle leucocephala</i>                          | <i>Hydrocotyle sibthorpioides</i> _NC_035502             | 0.0081 | 0.0093 |
| <i>Hydrocotyle dielsiana</i>                             | <i>Hydrocotyle leucocephala</i>                          | 0.004  | 0.0046 |
| <i>Hydrocotyle dielsiana</i>                             | <i>Hydrocotyle sibthorpioides</i>                        | 0.004  | 0.0046 |
| <i>Hydrocotyle dielsiana</i>                             | <i>Hydrocotyle sibthorpioides</i> _NC_035502             | 0.004  | 0.0046 |
| <i>Hydrocotyle hookeri</i> subsp. <i>chinensis</i>       | <i>Hydrocotyle leucocephala</i>                          | 0.004  | 0.0046 |
| <i>Hydrocotyle hookeri</i> subsp. <i>chinensis</i>       | <i>Hydrocotyle sibthorpioides</i>                        | 0.004  | 0.0046 |
| <i>Hydrocotyle hookeri</i> subsp. <i>chinensis</i>       | <i>Hydrocotyle sibthorpioides</i> _NC_035502             | 0.004  | 0.0046 |
| <i>Hydrocotyle leucocephala</i>                          | <i>Hydrocotyle nepalensis</i>                            | 0.004  | 0.0046 |
| <i>Hydrocotyle leucocephala</i>                          | <i>Hydrocotyle verticillata</i>                          | 0.004  | 0.0046 |
| <i>Hydrocotyle nepalensis</i>                            | <i>Hydrocotyle sibthorpioides</i>                        | 0.004  | 0.0046 |
| <i>Hydrocotyle nepalensis</i>                            | <i>Hydrocotyle sibthorpioides</i> _NC_035502             | 0.004  | 0.0046 |
| <i>Hydrocotyle sibthorpioides</i>                        | <i>Hydrocotyle verticillata</i>                          | 0.0094 | 0.0139 |
| <i>Hydrocotyle sibthorpioides</i> _NC_035502             | <i>Hydrocotyle verticillata</i>                          | 0.0094 | 0.0139 |
| <i>Hydrocotyle dielsiana</i>                             | <i>Hydrocotyle verticillata</i>                          | 0.0054 | 0.0092 |
| <i>Hydrocotyle hookeri</i> subsp. <i>chinensis</i>       | <i>Hydrocotyle verticillata</i>                          | 0.0054 | 0.0092 |
| <i>Hydrocotyle leucocephala</i>                          | <i>Hydrocotyle verticillata</i> _NC_015818               | 0.0027 | 0.0046 |
| <i>Hydrocotyle nepalensis</i>                            | <i>Hydrocotyle verticillata</i>                          | 0.0054 | 0.0092 |
| <i>Hydrocotyle sibthorpioides</i>                        | <i>Hydrocotyle verticillata</i> _NC_015818               | 0.0081 | 0.0139 |
| <i>Hydrocotyle sibthorpioides</i> _NC_035502             | <i>Hydrocotyle verticillata</i> _NC_015818               | 0.0081 | 0.0139 |
| <i>Hydrocotyle dielsiana</i>                             | <i>Hydrocotyle verticillata</i> _NC_015818               | 0.004  | 0.0092 |
| <i>Hydrocotyle hookeri</i> subsp. <i>chinensis</i>       | <i>Hydrocotyle verticillata</i> _NC_015818               | 0.004  | 0.0092 |
| <i>Hydrocotyle leucocephala</i>                          | <i>Hydrocotyle pseudoconferta</i>                        | 0.004  | 0.0092 |
| <i>Hydrocotyle nepalensis</i>                            | <i>Hydrocotyle verticillata</i> _NC_015818               | 0.004  | 0.0092 |
| <i>Hydrocotyle pseudoconferta</i>                        | <i>Hydrocotyle sibthorpioides</i>                        | 0.004  | 0.0093 |
| <i>Hydrocotyle pseudoconferta</i>                        | <i>Hydrocotyle sibthorpioides</i> _NC_035502             | 0.004  | 0.0093 |
| <i>Hydrocotyle sibthorpioides</i>                        | <i>Hydrocotyle sibthorpioides</i> var. <i>batrachium</i> | 0.004  | 0.0093 |
| <i>Hydrocotyle sibthorpioides</i> _NC_035502             | <i>Hydrocotyle sibthorpioides</i> var. <i>batrachium</i> | 0.004  | 0.0093 |
| <i>Hydrocotyle pseudoconferta</i>                        | <i>Hydrocotyle verticillata</i>                          | 0.0054 | 0.0139 |
| <i>Hydrocotyle dielsiana</i>                             | <i>Hydrocotyle sibthorpioides</i> var. <i>batrachium</i> | 0.0054 | 0.014  |
| <i>Hydrocotyle hookeri</i> subsp. <i>chinensis</i>       | <i>Hydrocotyle sibthorpioides</i> var. <i>batrachium</i> | 0.0054 | 0.014  |
| <i>Hydrocotyle nepalensis</i>                            | <i>Hydrocotyle sibthorpioides</i> var. <i>batrachium</i> | 0.0054 | 0.014  |
| <i>Hydrocotyle leucocephala</i>                          | <i>Hydrocotyle sibthorpioides</i> var. <i>batrachium</i> | 0.0067 | 0.0187 |
| <i>Hydrocotyle sibthorpioides</i> var. <i>batrachium</i> | <i>Hydrocotyle verticillata</i>                          | 0.0081 | 0.0234 |
| <i>Hydrocotyle pseudoconferta</i>                        | <i>Hydrocotyle sibthorpioides</i> var. <i>batrachium</i> | 0.0054 | 0.0187 |
| <i>Hydrocotyle pseudoconferta</i>                        | <i>Hydrocotyle verticillata</i> _NC_015818               | 0.004  | 0.0139 |
| <i>Hydrocotyle sibthorpioides</i> var. <i>batrachium</i> | <i>Hydrocotyle verticillata</i> _NC_015818               | 0.0067 | 0.0234 |
| <i>Hydrocotyle dielsiana</i>                             | <i>Hydrocotyle pseudoconferta</i>                        | 0      | 0.0046 |
| <i>Hydrocotyle hookeri</i> subsp. <i>chinensis</i>       | <i>Hydrocotyle pseudoconferta</i>                        | 0      | 0.0046 |

### 3. Ka and Ks of *matK*

| Seq 1                                                    | Seq 2                                                    | Ka     | Ks     |
|----------------------------------------------------------|----------------------------------------------------------|--------|--------|
| <i>Hydrocotyle sibthorpioides</i>                        | <i>Hydrocotyle sibthorpioides_NC_035502</i>              | 0.0009 | 0      |
| <i>Hydrocotyle nepalensis</i>                            | <i>Hydrocotyle pseudoconferta</i>                        | 0      | 0      |
| <i>Hydrocotyle dielsiana</i>                             | <i>Hydrocotyle pseudoconferta</i>                        | 0.0009 | 0      |
| <i>Hydrocotyle dielsiana</i>                             | <i>Hydrocotyle nepalensis</i>                            | 0.0009 | 0      |
| <i>Hydrocotyle dielsiana</i>                             | <i>Hydrocotyle hookeri</i> subsp. <i>chinensis</i>       | 0.0009 | 0      |
| <i>Hydrocotyle hookeri</i> subsp. <i>chinensis</i>       | <i>Hydrocotyle pseudoconferta</i>                        | 0      | 0      |
| <i>Hydrocotyle hookeri</i> subsp. <i>chinensis</i>       | <i>Hydrocotyle nepalensis</i>                            | 0      | 0      |
| <i>Hydrocotyle leucocephala</i>                          | <i>Hydrocotyle verticillata_NC_015818</i>                | 0.0129 | 0.0029 |
| <i>Hydrocotyle leucocephala</i>                          | <i>Hydrocotyle verticillata</i>                          | 0.0103 | 0.0058 |
| <i>Hydrocotyle leucocephala</i>                          | <i>Hydrocotyle pseudoconferta</i>                        | 0.0112 | 0.0116 |
| <i>Hydrocotyle leucocephala</i>                          | <i>Hydrocotyle nepalensis</i>                            | 0.0112 | 0.0116 |
| <i>Hydrocotyle hookeri</i> subsp. <i>chinensis</i>       | <i>Hydrocotyle leucocephala</i>                          | 0.0112 | 0.0116 |
| <i>Hydrocotyle verticillata</i>                          | <i>Hydrocotyle verticillata_NC_015818</i>                | 0.0026 | 0.0029 |
| <i>Hydrocotyle leucocephala</i>                          | <i>Hydrocotyle sibthorpioides</i> var. <i>batrachium</i> | 0.0208 | 0.0233 |
| <i>Hydrocotyle leucocephala</i>                          | <i>Hydrocotyle sibthorpioides</i>                        | 0.0225 | 0.0294 |
| <i>Hydrocotyle leucocephala</i>                          | <i>Hydrocotyle sibthorpioides_NC_035502</i>              | 0.0216 | 0.0294 |
| <i>Hydrocotyle dielsiana</i>                             | <i>Hydrocotyle leucocephala</i>                          | 0.0103 | 0.0145 |
| <i>Hydrocotyle sibthorpioides</i> var. <i>batrachium</i> | <i>Hydrocotyle verticillata_NC_015818</i>                | 0.0181 | 0.0262 |
| <i>Hydrocotyle sibthorpioides</i>                        | <i>Hydrocotyle verticillata_NC_015818</i>                | 0.0199 | 0.0323 |
| <i>Hydrocotyle sibthorpioides_NC_035502</i>              | <i>Hydrocotyle verticillata_NC_015818</i>                | 0.019  | 0.0322 |
| <i>Hydrocotyle dielsiana</i>                             | <i>Hydrocotyle verticillata_NC_015818</i>                | 0.0077 | 0.0145 |
| <i>Hydrocotyle sibthorpioides</i> var. <i>batrachium</i> | <i>Hydrocotyle verticillata</i>                          | 0.0155 | 0.0292 |
| <i>Hydrocotyle sibthorpioides</i>                        | <i>Hydrocotyle verticillata</i>                          | 0.0172 | 0.0353 |
| <i>Hydrocotyle pseudoconferta</i>                        | <i>Hydrocotyle verticillata_NC_015818</i>                | 0.0069 | 0.0145 |
| <i>Hydrocotyle nepalensis</i>                            | <i>Hydrocotyle verticillata_NC_015818</i>                | 0.0069 | 0.0145 |
| <i>Hydrocotyle hookeri</i> subsp. <i>chinensis</i>       | <i>Hydrocotyle verticillata_NC_015818</i>                | 0.0069 | 0.0145 |
| <i>Hydrocotyle sibthorpioides_NC_035502</i>              | <i>Hydrocotyle verticillata</i>                          | 0.0164 | 0.0353 |
| <i>Hydrocotyle pseudoconferta</i>                        | <i>Hydrocotyle sibthorpioides</i> var. <i>batrachium</i> | 0.0129 | 0.0291 |
| <i>Hydrocotyle nepalensis</i>                            | <i>Hydrocotyle sibthorpioides</i> var. <i>batrachium</i> | 0.0129 | 0.0291 |
| <i>Hydrocotyle hookeri</i> subsp. <i>chinensis</i>       | <i>Hydrocotyle sibthorpioides</i> var. <i>batrachium</i> | 0.0129 | 0.0291 |
| <i>Hydrocotyle pseudoconferta</i>                        | <i>Hydrocotyle sibthorpioides</i>                        | 0.0146 | 0.0352 |
| <i>Hydrocotyle nepalensis</i>                            | <i>Hydrocotyle sibthorpioides</i>                        | 0.0146 | 0.0352 |
| <i>Hydrocotyle hookeri</i> subsp. <i>chinensis</i>       | <i>Hydrocotyle sibthorpioides</i>                        | 0.0146 | 0.0352 |
| <i>Hydrocotyle sibthorpioides</i>                        | <i>Hydrocotyle sibthorpioides</i> var. <i>batrachium</i> | 0.0069 | 0.0174 |
| <i>Hydrocotyle pseudoconferta</i>                        | <i>Hydrocotyle sibthorpioides_NC_035502</i>              | 0.0138 | 0.0352 |
| <i>Hydrocotyle nepalensis</i>                            | <i>Hydrocotyle sibthorpioides_NC_035502</i>              | 0.0138 | 0.0352 |
| <i>Hydrocotyle hookeri</i> subsp. <i>chinensis</i>       | <i>Hydrocotyle sibthorpioides_NC_035502</i>              | 0.0138 | 0.0352 |
| <i>Hydrocotyle dielsiana</i>                             | <i>Hydrocotyle sibthorpioides</i> var. <i>batrachium</i> | 0.0121 | 0.0321 |
| <i>Hydrocotyle dielsiana</i>                             | <i>Hydrocotyle sibthorpioides</i>                        | 0.0138 | 0.0382 |
| <i>Hydrocotyle sibthorpioides_NC_035502</i>              | <i>Hydrocotyle sibthorpioides</i> var. <i>batrachium</i> | 0.006  | 0.0174 |
| <i>Hydrocotyle pseudoconferta</i>                        | <i>Hydrocotyle verticillata</i>                          | 0.006  | 0.0174 |
| <i>Hydrocotyle nepalensis</i>                            | <i>Hydrocotyle verticillata</i>                          | 0.006  | 0.0174 |
| <i>Hydrocotyle hookeri</i> subsp. <i>chinensis</i>       | <i>Hydrocotyle verticillata</i>                          | 0.006  | 0.0174 |
| <i>Hydrocotyle dielsiana</i>                             | <i>Hydrocotyle sibthorpioides_NC_035502</i>              | 0.0129 | 0.0382 |
| <i>Hydrocotyle dielsiana</i>                             | <i>Hydrocotyle verticillata</i>                          | 0.0051 | 0.0203 |



#### 4. Ka and Ks of *psbH*

| Seq 1                                                    | Seq 2                                                    | Ka     | Ks     |
|----------------------------------------------------------|----------------------------------------------------------|--------|--------|
| <i>Hydrocotyle dielsiana</i>                             | <i>Hydrocotyle hookeri</i> subsp. <i>chinensis</i>       | 0      | 0      |
| <i>Hydrocotyle dielsiana</i>                             | <i>Hydrocotyle nepalensis</i>                            | 0      | 0      |
| <i>Hydrocotyle dielsiana</i>                             | <i>Hydrocotyle pseudoconferta</i>                        | 0      | 0      |
| <i>Hydrocotyle dielsiana</i>                             | <i>Hydrocotyle verticillata</i>                          | 0      | 0      |
| <i>Hydrocotyle dielsiana</i>                             | <i>Hydrocotyle verticillata_NC_015818</i>                | 0      | 0      |
| <i>Hydrocotyle hookeri</i> subsp. <i>chinensis</i>       | <i>Hydrocotyle nepalensis</i>                            | 0      | 0      |
| <i>Hydrocotyle hookeri</i> subsp. <i>chinensis</i>       | <i>Hydrocotyle pseudoconferta</i>                        | 0      | 0      |
| <i>Hydrocotyle hookeri</i> subsp. <i>chinensis</i>       | <i>Hydrocotyle verticillata</i>                          | 0      | 0      |
| <i>Hydrocotyle hookeri</i> subsp. <i>chinensis</i>       | <i>Hydrocotyle verticillata_NC_015818</i>                | 0      | 0      |
| <i>Hydrocotyle nepalensis</i>                            | <i>Hydrocotyle pseudoconferta</i>                        | 0      | 0      |
| <i>Hydrocotyle nepalensis</i>                            | <i>Hydrocotyle verticillata</i>                          | 0      | 0      |
| <i>Hydrocotyle nepalensis</i>                            | <i>Hydrocotyle verticillata_NC_015818</i>                | 0      | 0      |
| <i>Hydrocotyle pseudoconferta</i>                        | <i>Hydrocotyle verticillata</i>                          | 0      | 0      |
| <i>Hydrocotyle pseudoconferta</i>                        | <i>Hydrocotyle verticillata_NC_015818</i>                | 0      | 0      |
| <i>Hydrocotyle sibthorpioides</i>                        | <i>Hydrocotyle sibthorpioides_NC_035502</i>              | 0      | 0      |
| <i>Hydrocotyle sibthorpioides</i>                        | <i>Hydrocotyle sibthorpioides</i> var. <i>batrachium</i> | 0.0121 | 0      |
| <i>Hydrocotyle sibthorpioides_NC_035502</i>              | <i>Hydrocotyle sibthorpioides</i> var. <i>batrachium</i> | 0.0121 | 0      |
| <i>Hydrocotyle verticillata</i>                          | <i>Hydrocotyle verticillata_NC_015818</i>                | 0      | 0      |
| <i>Hydrocotyle dielsiana</i>                             | <i>Hydrocotyle sibthorpioides</i>                        | 0.0182 | 0.0194 |
| <i>Hydrocotyle dielsiana</i>                             | <i>Hydrocotyle sibthorpioides_NC_035502</i>              | 0.0182 | 0.0194 |
| <i>Hydrocotyle hookeri</i> subsp. <i>chinensis</i>       | <i>Hydrocotyle sibthorpioides</i>                        | 0.0182 | 0.0194 |
| <i>Hydrocotyle hookeri</i> subsp. <i>chinensis</i>       | <i>Hydrocotyle sibthorpioides_NC_035502</i>              | 0.0182 | 0.0194 |
| <i>Hydrocotyle nepalensis</i>                            | <i>Hydrocotyle sibthorpioides</i>                        | 0.0182 | 0.0194 |
| <i>Hydrocotyle nepalensis</i>                            | <i>Hydrocotyle sibthorpioides_NC_035502</i>              | 0.0182 | 0.0194 |
| <i>Hydrocotyle pseudoconferta</i>                        | <i>Hydrocotyle sibthorpioides</i>                        | 0.0182 | 0.0194 |
| <i>Hydrocotyle pseudoconferta</i>                        | <i>Hydrocotyle sibthorpioides_NC_035502</i>              | 0.0182 | 0.0194 |
| <i>Hydrocotyle sibthorpioides</i>                        | <i>Hydrocotyle verticillata</i>                          | 0.0182 | 0.0194 |
| <i>Hydrocotyle sibthorpioides</i>                        | <i>Hydrocotyle verticillata_NC_015818</i>                | 0.0182 | 0.0194 |
| <i>Hydrocotyle sibthorpioides_NC_035502</i>              | <i>Hydrocotyle verticillata</i>                          | 0.0182 | 0.0194 |
| <i>Hydrocotyle sibthorpioides_NC_035502</i>              | <i>Hydrocotyle verticillata_NC_015818</i>                | 0.0182 | 0.0194 |
| <i>Hydrocotyle leucocephala</i>                          | <i>Hydrocotyle sibthorpioides</i>                        | 0.0182 | 0.0393 |
| <i>Hydrocotyle leucocephala</i>                          | <i>Hydrocotyle sibthorpioides_NC_035502</i>              | 0.0182 | 0.0393 |
| <i>Hydrocotyle dielsiana</i>                             | <i>Hydrocotyle sibthorpioides</i> var. <i>batrachium</i> | 0.006  | 0.0195 |
| <i>Hydrocotyle hookeri</i> subsp. <i>chinensis</i>       | <i>Hydrocotyle sibthorpioides</i> var. <i>batrachium</i> | 0.006  | 0.0195 |
| <i>Hydrocotyle nepalensis</i>                            | <i>Hydrocotyle sibthorpioides</i> var. <i>batrachium</i> | 0.006  | 0.0195 |
| <i>Hydrocotyle pseudoconferta</i>                        | <i>Hydrocotyle sibthorpioides</i> var. <i>batrachium</i> | 0.006  | 0.0195 |
| <i>Hydrocotyle sibthorpioides</i> var. <i>batrachium</i> | <i>Hydrocotyle verticillata</i>                          | 0.006  | 0.0195 |
| <i>Hydrocotyle sibthorpioides</i> var. <i>batrachium</i> | <i>Hydrocotyle verticillata_NC_015818</i>                | 0.006  | 0.0195 |
| <i>Hydrocotyle leucocephala</i>                          | <i>Hydrocotyle sibthorpioides</i> var. <i>batrachium</i> | 0.006  | 0.0394 |
| <i>Hydrocotyle dielsiana</i>                             | <i>Hydrocotyle leucocephala</i>                          | 0      | 0.0194 |
| <i>Hydrocotyle hookeri</i> subsp. <i>chinensis</i>       | <i>Hydrocotyle leucocephala</i>                          | 0      | 0.0194 |
| <i>Hydrocotyle leucocephala</i>                          | <i>Hydrocotyle nepalensis</i>                            | 0      | 0.0194 |
| <i>Hydrocotyle leucocephala</i>                          | <i>Hydrocotyle pseudoconferta</i>                        | 0      | 0.0194 |
| <i>Hydrocotyle leucocephala</i>                          | <i>Hydrocotyle verticillata</i>                          | 0      | 0.0194 |
| <i>Hydrocotyle leucocephala</i>                          | <i>Hydrocotyle verticillata_NC_015818</i>                | 0      | 0.0194 |

#### 5. Ka and Ks of *rpoA*

| Seq 1                                                    | Seq 2                                                    | Ka     | Ks     |
|----------------------------------------------------------|----------------------------------------------------------|--------|--------|
| <i>Hydrocotyle dielsiana</i>                             | <i>Hydrocotyle hookeri</i> subsp. <i>chinensis</i>       | 0      | 0      |
| <i>Hydrocotyle dielsiana</i>                             | <i>Hydrocotyle nepalensis</i>                            | 0      | 0      |
| <i>Hydrocotyle dielsiana</i>                             | <i>Hydrocotyle pseudoconferta</i>                        | 0      | 0      |
| <i>Hydrocotyle hookeri</i> subsp. <i>chinensis</i>       | <i>Hydrocotyle nepalensis</i>                            | 0      | 0      |
| <i>Hydrocotyle hookeri</i> subsp. <i>chinensis</i>       | <i>Hydrocotyle pseudoconferta</i>                        | 0      | 0      |
| <i>Hydrocotyle nepalensis</i>                            | <i>Hydrocotyle pseudoconferta</i>                        | 0      | 0      |
| <i>Hydrocotyle sibthorpioides</i>                        | <i>Hydrocotyle sibthorpioides</i> _NC_035502             | 0      | 0      |
| <i>Hydrocotyle verticillata</i>                          | <i>Hydrocotyle verticillata</i> _NC_015818               | 0.0012 | 0      |
| <i>Hydrocotyle dielsiana</i>                             | <i>Hydrocotyle verticillata</i> _NC_015818               | 0.0086 | 0.0043 |
| <i>Hydrocotyle hookeri</i> subsp. <i>chinensis</i>       | <i>Hydrocotyle verticillata</i> _NC_015818               | 0.0086 | 0.0043 |
| <i>Hydrocotyle nepalensis</i>                            | <i>Hydrocotyle verticillata</i> _NC_015818               | 0.0086 | 0.0043 |
| <i>Hydrocotyle pseudoconferta</i>                        | <i>Hydrocotyle verticillata</i> _NC_015818               | 0.0086 | 0.0043 |
| <i>Hydrocotyle dielsiana</i>                             | <i>Hydrocotyle verticillata</i>                          | 0.0074 | 0.0043 |
| <i>Hydrocotyle hookeri</i> subsp. <i>chinensis</i>       | <i>Hydrocotyle verticillata</i>                          | 0.0074 | 0.0043 |
| <i>Hydrocotyle nepalensis</i>                            | <i>Hydrocotyle verticillata</i>                          | 0.0074 | 0.0043 |
| <i>Hydrocotyle pseudoconferta</i>                        | <i>Hydrocotyle verticillata</i>                          | 0.0074 | 0.0043 |
| <i>Hydrocotyle dielsiana</i>                             | <i>Hydrocotyle sibthorpioides</i> var. <i>batrachium</i> | 0.0086 | 0.0086 |
| <i>Hydrocotyle hookeri</i> subsp. <i>chinensis</i>       | <i>Hydrocotyle sibthorpioides</i> var. <i>batrachium</i> | 0.0086 | 0.0086 |
| <i>Hydrocotyle nepalensis</i>                            | <i>Hydrocotyle sibthorpioides</i> var. <i>batrachium</i> | 0.0086 | 0.0086 |
| <i>Hydrocotyle pseudoconferta</i>                        | <i>Hydrocotyle sibthorpioides</i> var. <i>batrachium</i> | 0.0086 | 0.0086 |
| <i>Hydrocotyle dielsiana</i>                             | <i>Hydrocotyle leucocephala</i>                          | 0.0074 | 0.0086 |
| <i>Hydrocotyle hookeri</i> subsp. <i>chinensis</i>       | <i>Hydrocotyle leucocephala</i>                          | 0.0074 | 0.0086 |
| <i>Hydrocotyle leucocephala</i>                          | <i>Hydrocotyle nepalensis</i>                            | 0.0074 | 0.0086 |
| <i>Hydrocotyle leucocephala</i>                          | <i>Hydrocotyle pseudoconferta</i>                        | 0.0074 | 0.0086 |
| <i>Hydrocotyle dielsiana</i>                             | <i>Hydrocotyle sibthorpioides</i>                        | 0.0111 | 0.0173 |
| <i>Hydrocotyle dielsiana</i>                             | <i>Hydrocotyle sibthorpioides</i> _NC_035502             | 0.0111 | 0.0173 |
| <i>Hydrocotyle hookeri</i> subsp. <i>chinensis</i>       | <i>Hydrocotyle sibthorpioides</i>                        | 0.0111 | 0.0173 |
| <i>Hydrocotyle hookeri</i> subsp. <i>chinensis</i>       | <i>Hydrocotyle sibthorpioides</i> _NC_035502             | 0.0111 | 0.0173 |
| <i>Hydrocotyle nepalensis</i>                            | <i>Hydrocotyle sibthorpioides</i>                        | 0.0111 | 0.0173 |
| <i>Hydrocotyle nepalensis</i>                            | <i>Hydrocotyle sibthorpioides</i> _NC_035502             | 0.0111 | 0.0173 |
| <i>Hydrocotyle pseudoconferta</i>                        | <i>Hydrocotyle sibthorpioides</i>                        | 0.0111 | 0.0173 |
| <i>Hydrocotyle pseudoconferta</i>                        | <i>Hydrocotyle sibthorpioides</i> _NC_035502             | 0.0111 | 0.0173 |
| <i>Hydrocotyle sibthorpioides</i> var. <i>batrachium</i> | <i>Hydrocotyle verticillata</i> _NC_015818               | 0.0098 | 0.0173 |
| <i>Hydrocotyle sibthorpioides</i> var. <i>batrachium</i> | <i>Hydrocotyle verticillata</i>                          | 0.0086 | 0.0173 |
| <i>Hydrocotyle leucocephala</i>                          | <i>Hydrocotyle verticillata</i> _NC_015818               | 0.0061 | 0.0129 |
| <i>Hydrocotyle sibthorpioides</i>                        | <i>Hydrocotyle verticillata</i> _NC_015818               | 0.0123 | 0.0262 |
| <i>Hydrocotyle sibthorpioides</i> _NC_035502             | <i>Hydrocotyle verticillata</i> _NC_015818               | 0.0123 | 0.0262 |
| <i>Hydrocotyle sibthorpioides</i>                        | <i>Hydrocotyle verticillata</i>                          | 0.0111 | 0.0262 |
| <i>Hydrocotyle sibthorpioides</i> _NC_035502             | <i>Hydrocotyle verticillata</i>                          | 0.0111 | 0.0262 |
| <i>Hydrocotyle leucocephala</i>                          | <i>Hydrocotyle sibthorpioides</i> var. <i>batrachium</i> | 0.0086 | 0.0217 |
| <i>Hydrocotyle leucocephala</i>                          | <i>Hydrocotyle verticillata</i>                          | 0.0049 | 0.0129 |
| <i>Hydrocotyle sibthorpioides</i>                        | <i>Hydrocotyle sibthorpioides</i> var. <i>batrachium</i> | 0.0049 | 0.013  |
| <i>Hydrocotyle sibthorpioides</i> _NC_035502             | <i>Hydrocotyle sibthorpioides</i> var. <i>batrachium</i> | 0.0049 | 0.013  |
| <i>Hydrocotyle leucocephala</i>                          | <i>Hydrocotyle sibthorpioides</i>                        | 0.0111 | 0.0306 |
| <i>Hydrocotyle leucocephala</i>                          | <i>Hydrocotyle sibthorpioides</i> _NC_035502             | 0.0111 | 0.0306 |

## 6. Ka and Ks of *ycf1a*

| Seq 1 | Seq 2 | Ka | Ks |
|-------|-------|----|----|
|-------|-------|----|----|

|                                                          |                                                          |        |        |
|----------------------------------------------------------|----------------------------------------------------------|--------|--------|
| <i>Hydrocotyle hookeri</i> subsp. <i>chinensis</i>       | <i>Hydrocotyle nepalensis</i>                            | 0.0002 | 0      |
| <i>Hydrocotyle hookeri</i> subsp. <i>chinensis</i>       | <i>Hydrocotyle pseudoconferta</i>                        | 0      | 0      |
| <i>Hydrocotyle nepalensis</i>                            | <i>Hydrocotyle pseudoconferta</i>                        | 0.0002 | 0      |
| <i>Hydrocotyle sibthorpioides</i>                        | <i>Hydrocotyle sibthorpioides</i> _NC_035502             | 0      | 0      |
| <i>Hydrocotyle dielsiana</i>                             | <i>Hydrocotyle nepalensis</i>                            | 0.0014 | 0.0018 |
| <i>Hydrocotyle nepalensis</i>                            | <i>Hydrocotyle verticillata</i> _NC_015818               | 0.0134 | 0.0189 |
| <i>Hydrocotyle dielsiana</i>                             | <i>Hydrocotyle verticillata</i> _NC_015818               | 0.0143 | 0.0202 |
| <i>Hydrocotyle hookeri</i> subsp. <i>chinensis</i>       | <i>Hydrocotyle verticillata</i> _NC_015818               | 0.0132 | 0.0189 |
| <i>Hydrocotyle pseudoconferta</i>                        | <i>Hydrocotyle verticillata</i> _NC_015818               | 0.0132 | 0.0189 |
| <i>Hydrocotyle verticillata</i>                          | <i>Hydrocotyle verticillata</i> _NC_015818               | 0.0037 | 0.0053 |
| <i>Hydrocotyle dielsiana</i>                             | <i>Hydrocotyle hookeri</i> subsp. <i>chinensis</i>       | 0.0012 | 0.0018 |
| <i>Hydrocotyle dielsiana</i>                             | <i>Hydrocotyle pseudoconferta</i>                        | 0.0012 | 0.0018 |
| <i>Hydrocotyle leucocephala</i>                          | <i>Hydrocotyle nepalensis</i>                            | 0.0127 | 0.0198 |
| <i>Hydrocotyle hookeri</i> subsp. <i>chinensis</i>       | <i>Hydrocotyle leucocephala</i>                          | 0.0125 | 0.0198 |
| <i>Hydrocotyle leucocephala</i>                          | <i>Hydrocotyle pseudoconferta</i>                        | 0.0125 | 0.0198 |
| <i>Hydrocotyle leucocephala</i>                          | <i>Hydrocotyle sibthorpioides</i>                        | 0.0266 | 0.0422 |
| <i>Hydrocotyle leucocephala</i>                          | <i>Hydrocotyle sibthorpioides</i> _NC_035502             | 0.0266 | 0.0422 |
| <i>Hydrocotyle dielsiana</i>                             | <i>Hydrocotyle verticillata</i>                          | 0.0138 | 0.022  |
| <i>Hydrocotyle nepalensis</i>                            | <i>Hydrocotyle verticillata</i>                          | 0.0129 | 0.0207 |
| <i>Hydrocotyle dielsiana</i>                             | <i>Hydrocotyle leucocephala</i>                          | 0.0134 | 0.0216 |
| <i>Hydrocotyle hookeri</i> subsp. <i>chinensis</i>       | <i>Hydrocotyle verticillata</i>                          | 0.0127 | 0.0207 |
| <i>Hydrocotyle pseudoconferta</i>                        | <i>Hydrocotyle verticillata</i>                          | 0.0127 | 0.0207 |
| <i>Hydrocotyle sibthorpioides</i>                        | <i>Hydrocotyle verticillata</i> _NC_015818               | 0.0268 | 0.0459 |
| <i>Hydrocotyle sibthorpioides</i> _NC_035502             | <i>Hydrocotyle verticillata</i> _NC_015818               | 0.0268 | 0.0459 |
| <i>Hydrocotyle leucocephala</i>                          | <i>Hydrocotyle sibthorpioides</i> var. <i>batrachium</i> | 0.0242 | 0.042  |
| <i>Hydrocotyle sibthorpioides</i>                        | <i>Hydrocotyle verticillata</i>                          | 0.0268 | 0.0468 |
| <i>Hydrocotyle sibthorpioides</i> _NC_035502             | <i>Hydrocotyle verticillata</i>                          | 0.0268 | 0.0468 |
| <i>Hydrocotyle sibthorpioides</i> var. <i>batrachium</i> | <i>Hydrocotyle verticillata</i> _NC_015818               | 0.0244 | 0.043  |
| <i>Hydrocotyle sibthorpioides</i> var. <i>batrachium</i> | <i>Hydrocotyle verticillata</i>                          | 0.0244 | 0.0448 |
| <i>Hydrocotyle leucocephala</i>                          | <i>Hydrocotyle verticillata</i> _NC_015818               | 0.0101 | 0.0189 |
| <i>Hydrocotyle dielsiana</i>                             | <i>Hydrocotyle sibthorpioides</i>                        | 0.0213 | 0.0402 |
| <i>Hydrocotyle dielsiana</i>                             | <i>Hydrocotyle sibthorpioides</i> _NC_035502             | 0.0213 | 0.0402 |
| <i>Hydrocotyle nepalensis</i>                            | <i>Hydrocotyle sibthorpioides</i>                        | 0.0203 | 0.0384 |
| <i>Hydrocotyle nepalensis</i>                            | <i>Hydrocotyle sibthorpioides</i> _NC_035502             | 0.0203 | 0.0384 |
| <i>Hydrocotyle hookeri</i> subsp. <i>chinensis</i>       | <i>Hydrocotyle sibthorpioides</i>                        | 0.0201 | 0.0384 |
| <i>Hydrocotyle hookeri</i> subsp. <i>chinensis</i>       | <i>Hydrocotyle sibthorpioides</i> _NC_035502             | 0.0201 | 0.0384 |
| <i>Hydrocotyle pseudoconferta</i>                        | <i>Hydrocotyle sibthorpioides</i>                        | 0.0201 | 0.0384 |
| <i>Hydrocotyle pseudoconferta</i>                        | <i>Hydrocotyle sibthorpioides</i> _NC_035502             | 0.0201 | 0.0384 |
| <i>Hydrocotyle leucocephala</i>                          | <i>Hydrocotyle verticillata</i>                          | 0.0096 | 0.0189 |
| <i>Hydrocotyle dielsiana</i>                             | <i>Hydrocotyle sibthorpioides</i> var. <i>batrachium</i> | 0.0194 | 0.0382 |
| <i>Hydrocotyle nepalensis</i>                            | <i>Hydrocotyle sibthorpioides</i> var. <i>batrachium</i> | 0.0184 | 0.0364 |
| <i>Hydrocotyle hookeri</i> subsp. <i>chinensis</i>       | <i>Hydrocotyle sibthorpioides</i> var. <i>batrachium</i> | 0.0182 | 0.0364 |
| <i>Hydrocotyle pseudoconferta</i>                        | <i>Hydrocotyle sibthorpioides</i> var. <i>batrachium</i> | 0.0182 | 0.0364 |
| <i>Hydrocotyle sibthorpioides</i>                        | <i>Hydrocotyle sibthorpioides</i> var. <i>batrachium</i> | 0.0084 | 0.019  |
| <i>Hydrocotyle sibthorpioides</i> _NC_035502             | <i>Hydrocotyle sibthorpioides</i> var. <i>batrachium</i> | 0.0084 | 0.019  |

## 7. Ka and Ks of *ycf1b*

| Seq 1                        | Seq 2                                              | Ka | Ks |
|------------------------------|----------------------------------------------------|----|----|
| <i>Hydrocotyle dielsiana</i> | <i>Hydrocotyle hookeri</i> subsp. <i>chinensis</i> | 0  | 0  |
| <i>Hydrocotyle dielsiana</i> | <i>Hydrocotyle nepalensis</i>                      | 0  | 0  |

|                                                          |                                                          |        |        |
|----------------------------------------------------------|----------------------------------------------------------|--------|--------|
| <i>Hydrocotyle dielsiana</i>                             | <i>Hydrocotyle pseudoconferta</i>                        | 0      | 0      |
| <i>Hydrocotyle dielsiana</i>                             | <i>Hydrocotyle sibthorpioides</i> var. <i>batrachium</i> | 0.0063 | 0      |
| <i>Hydrocotyle dielsiana</i>                             | <i>Hydrocotyle verticillata</i>                          | 0.0095 | 0      |
| <i>Hydrocotyle dielsiana</i>                             | <i>Hydrocotyle verticillata</i> _NC_015818               | 0.0079 | 0      |
| <i>Hydrocotyle hookeri</i> subsp. <i>chinensis</i>       | <i>Hydrocotyle nepalensis</i>                            | 0      | 0      |
| <i>Hydrocotyle hookeri</i> subsp. <i>chinensis</i>       | <i>Hydrocotyle pseudoconferta</i>                        | 0      | 0      |
| <i>Hydrocotyle hookeri</i> subsp. <i>chinensis</i>       | <i>Hydrocotyle sibthorpioides</i> var. <i>batrachium</i> | 0.0063 | 0      |
| <i>Hydrocotyle hookeri</i> subsp. <i>chinensis</i>       | <i>Hydrocotyle verticillata</i>                          | 0.0095 | 0      |
| <i>Hydrocotyle hookeri</i> subsp. <i>chinensis</i>       | <i>Hydrocotyle verticillata</i> _NC_015818               | 0.0079 | 0      |
| <i>Hydrocotyle nepalensis</i>                            | <i>Hydrocotyle pseudoconferta</i>                        | 0      | 0      |
| <i>Hydrocotyle nepalensis</i>                            | <i>Hydrocotyle sibthorpioides</i> var. <i>batrachium</i> | 0.0063 | 0      |
| <i>Hydrocotyle nepalensis</i>                            | <i>Hydrocotyle verticillata</i>                          | 0.0095 | 0      |
| <i>Hydrocotyle nepalensis</i>                            | <i>Hydrocotyle verticillata</i> _NC_015818               | 0.0079 | 0      |
| <i>Hydrocotyle pseudoconferta</i>                        | <i>Hydrocotyle sibthorpioides</i> var. <i>batrachium</i> | 0.0063 | 0      |
| <i>Hydrocotyle pseudoconferta</i>                        | <i>Hydrocotyle verticillata</i>                          | 0.0095 | 0      |
| <i>Hydrocotyle pseudoconferta</i>                        | <i>Hydrocotyle verticillata</i> _NC_015818               | 0.0079 | 0      |
| <i>Hydrocotyle sibthorpioides</i>                        | <i>Hydrocotyle sibthorpioides</i> _NC_035502             | 0      | 0      |
| <i>Hydrocotyle sibthorpioides</i> var. <i>batrachium</i> | <i>Hydrocotyle verticillata</i>                          | 0.0095 | 0      |
| <i>Hydrocotyle sibthorpioides</i> var. <i>batrachium</i> | <i>Hydrocotyle verticillata</i> _NC_015818               | 0.0079 | 0      |
| <i>Hydrocotyle verticillata</i>                          | <i>Hydrocotyle verticillata</i> _NC_015818               | 0.0016 | 0      |
| <i>Hydrocotyle dielsiana</i>                             | <i>Hydrocotyle leucocephala</i>                          | 0.0095 | 0.0052 |
| <i>Hydrocotyle hookeri</i> subsp. <i>chinensis</i>       | <i>Hydrocotyle leucocephala</i>                          | 0.0095 | 0.0052 |
| <i>Hydrocotyle leucocephala</i>                          | <i>Hydrocotyle nepalensis</i>                            | 0.0095 | 0.0052 |
| <i>Hydrocotyle leucocephala</i>                          | <i>Hydrocotyle pseudoconferta</i>                        | 0.0095 | 0.0052 |
| <i>Hydrocotyle leucocephala</i>                          | <i>Hydrocotyle sibthorpioides</i> var. <i>batrachium</i> | 0.0095 | 0.0052 |
| <i>Hydrocotyle leucocephala</i>                          | <i>Hydrocotyle verticillata</i>                          | 0.0063 | 0.0052 |
| <i>Hydrocotyle sibthorpioides</i>                        | <i>Hydrocotyle verticillata</i>                          | 0.0095 | 0.0104 |
| <i>Hydrocotyle sibthorpioides</i> _NC_035502             | <i>Hydrocotyle verticillata</i>                          | 0.0095 | 0.0104 |
| <i>Hydrocotyle leucocephala</i>                          | <i>Hydrocotyle verticillata</i> _NC_015818               | 0.0047 | 0.0052 |
| <i>Hydrocotyle sibthorpioides</i>                        | <i>Hydrocotyle verticillata</i> _NC_015818               | 0.0079 | 0.0104 |
| <i>Hydrocotyle sibthorpioides</i> _NC_035502             | <i>Hydrocotyle verticillata</i> _NC_015818               | 0.0079 | 0.0104 |
| <i>Hydrocotyle leucocephala</i>                          | <i>Hydrocotyle sibthorpioides</i>                        | 0.0095 | 0.0156 |
| <i>Hydrocotyle leucocephala</i>                          | <i>Hydrocotyle sibthorpioides</i> _NC_035502             | 0.0095 | 0.0156 |
| <i>Hydrocotyle dielsiana</i>                             | <i>Hydrocotyle sibthorpioides</i>                        | 0.0063 | 0.0104 |
| <i>Hydrocotyle dielsiana</i>                             | <i>Hydrocotyle sibthorpioides</i> _NC_035502             | 0.0063 | 0.0104 |
| <i>Hydrocotyle hookeri</i> subsp. <i>chinensis</i>       | <i>Hydrocotyle sibthorpioides</i>                        | 0.0063 | 0.0104 |
| <i>Hydrocotyle hookeri</i> subsp. <i>chinensis</i>       | <i>Hydrocotyle sibthorpioides</i> _NC_035502             | 0.0063 | 0.0104 |
| <i>Hydrocotyle nepalensis</i>                            | <i>Hydrocotyle sibthorpioides</i>                        | 0.0063 | 0.0104 |
| <i>Hydrocotyle nepalensis</i>                            | <i>Hydrocotyle sibthorpioides</i> _NC_035502             | 0.0063 | 0.0104 |
| <i>Hydrocotyle pseudoconferta</i>                        | <i>Hydrocotyle sibthorpioides</i>                        | 0.0063 | 0.0104 |
| <i>Hydrocotyle pseudoconferta</i>                        | <i>Hydrocotyle sibthorpioides</i> _NC_035502             | 0.0063 | 0.0104 |
| <i>Hydrocotyle sibthorpioides</i>                        | <i>Hydrocotyle sibthorpioides</i> var. <i>batrachium</i> | 0      | 0.0104 |
| <i>Hydrocotyle sibthorpioides</i> _NC_035502             | <i>Hydrocotyle sibthorpioides</i> var. <i>batrachium</i> | 0      | 0.0104 |

## 8. Ka and Ks of *ycf2*

| Seq 1                                              | Seq 2                                              | Ka | Ks |
|----------------------------------------------------|----------------------------------------------------|----|----|
| <i>Hydrocotyle dielsiana</i>                       | <i>Hydrocotyle hookeri</i> subsp. <i>chinensis</i> | 0  | 0  |
| <i>Hydrocotyle dielsiana</i>                       | <i>Hydrocotyle nepalensis</i>                      | 0  | 0  |
| <i>Hydrocotyle dielsiana</i>                       | <i>Hydrocotyle pseudoconferta</i>                  | 0  | 0  |
| <i>Hydrocotyle hookeri</i> subsp. <i>chinensis</i> | <i>Hydrocotyle nepalensis</i>                      | 0  | 0  |

|                                                          |                                                          |        |        |
|----------------------------------------------------------|----------------------------------------------------------|--------|--------|
| <i>Hydrocotyle hookeri</i> subsp. <i>chinensis</i>       | <i>Hydrocotyle pseudoconferta</i>                        | 0      | 0      |
| <i>Hydrocotyle nepalensis</i>                            | <i>Hydrocotyle pseudoconferta</i>                        | 0      | 0      |
| <i>Hydrocotyle sibthorpioides</i>                        | <i>Hydrocotyle sibthorpioides_NC_035502</i>              | 0      | 0      |
| <i>Hydrocotyle verticillata</i>                          | <i>Hydrocotyle verticillata_NC_015818</i>                | 0.0008 | 0      |
| <i>Hydrocotyle sibthorpioides</i>                        | <i>Hydrocotyle verticillata</i>                          | 0.0047 | 0.0051 |
| <i>Hydrocotyle sibthorpioides</i>                        | <i>Hydrocotyle verticillata_NC_015818</i>                | 0.0047 | 0.0051 |
| <i>Hydrocotyle sibthorpioides_NC_035502</i>              | <i>Hydrocotyle verticillata</i>                          | 0.0047 | 0.0051 |
| <i>Hydrocotyle sibthorpioides_NC_035502</i>              | <i>Hydrocotyle verticillata_NC_015818</i>                | 0.0047 | 0.0051 |
| <i>Hydrocotyle leucocephala</i>                          | <i>Hydrocotyle sibthorpioides</i>                        | 0.0053 | 0.0058 |
| <i>Hydrocotyle leucocephala</i>                          | <i>Hydrocotyle sibthorpioides_NC_035502</i>              | 0.0053 | 0.0058 |
| <i>Hydrocotyle sibthorpioides</i> var. <i>batrachium</i> | <i>Hydrocotyle verticillata</i>                          | 0.0039 | 0.0043 |
| <i>Hydrocotyle sibthorpioides</i> var. <i>batrachium</i> | <i>Hydrocotyle verticillata_NC_015818</i>                | 0.0039 | 0.0043 |
| <i>Hydrocotyle leucocephala</i>                          | <i>Hydrocotyle sibthorpioides</i> var. <i>batrachium</i> | 0.0045 | 0.0051 |
| <i>Hydrocotyle dielsiana</i>                             | <i>Hydrocotyle leucocephala</i>                          | 0.0024 | 0.0029 |
| <i>Hydrocotyle hookeri</i> subsp. <i>chinensis</i>       | <i>Hydrocotyle leucocephala</i>                          | 0.0024 | 0.0029 |
| <i>Hydrocotyle leucocephala</i>                          | <i>Hydrocotyle nepalensis</i>                            | 0.0024 | 0.0029 |
| <i>Hydrocotyle leucocephala</i>                          | <i>Hydrocotyle pseudoconferta</i>                        | 0.0024 | 0.0029 |
| <i>Hydrocotyle dielsiana</i>                             | <i>Hydrocotyle verticillata</i>                          | 0.0018 | 0.0022 |
| <i>Hydrocotyle dielsiana</i>                             | <i>Hydrocotyle verticillata_NC_015818</i>                | 0.0018 | 0.0022 |
| <i>Hydrocotyle hookeri</i> subsp. <i>chinensis</i>       | <i>Hydrocotyle verticillata</i>                          | 0.0018 | 0.0022 |
| <i>Hydrocotyle hookeri</i> subsp. <i>chinensis</i>       | <i>Hydrocotyle verticillata_NC_015818</i>                | 0.0018 | 0.0022 |
| <i>Hydrocotyle leucocephala</i>                          | <i>Hydrocotyle verticillata</i>                          | 0.0018 | 0.0022 |
| <i>Hydrocotyle leucocephala</i>                          | <i>Hydrocotyle verticillata_NC_015818</i>                | 0.0018 | 0.0022 |
| <i>Hydrocotyle nepalensis</i>                            | <i>Hydrocotyle verticillata</i>                          | 0.0018 | 0.0022 |
| <i>Hydrocotyle nepalensis</i>                            | <i>Hydrocotyle verticillata_NC_015818</i>                | 0.0018 | 0.0022 |
| <i>Hydrocotyle pseudoconferta</i>                        | <i>Hydrocotyle verticillata</i>                          | 0.0018 | 0.0022 |
| <i>Hydrocotyle pseudoconferta</i>                        | <i>Hydrocotyle verticillata_NC_015818</i>                | 0.0018 | 0.0022 |
| <i>Hydrocotyle dielsiana</i>                             | <i>Hydrocotyle sibthorpioides</i>                        | 0.0033 | 0.0058 |
| <i>Hydrocotyle dielsiana</i>                             | <i>Hydrocotyle sibthorpioides_NC_035502</i>              | 0.0033 | 0.0058 |
| <i>Hydrocotyle hookeri</i> subsp. <i>chinensis</i>       | <i>Hydrocotyle sibthorpioides</i>                        | 0.0033 | 0.0058 |
| <i>Hydrocotyle hookeri</i> subsp. <i>chinensis</i>       | <i>Hydrocotyle sibthorpioides_NC_035502</i>              | 0.0033 | 0.0058 |
| <i>Hydrocotyle nepalensis</i>                            | <i>Hydrocotyle sibthorpioides</i>                        | 0.0033 | 0.0058 |
| <i>Hydrocotyle nepalensis</i>                            | <i>Hydrocotyle sibthorpioides_NC_035502</i>              | 0.0033 | 0.0058 |
| <i>Hydrocotyle pseudoconferta</i>                        | <i>Hydrocotyle sibthorpioides</i>                        | 0.0033 | 0.0058 |
| <i>Hydrocotyle pseudoconferta</i>                        | <i>Hydrocotyle sibthorpioides_NC_035502</i>              | 0.0033 | 0.0058 |
| <i>Hydrocotyle dielsiana</i>                             | <i>Hydrocotyle sibthorpioides</i> var. <i>batrachium</i> | 0.0024 | 0.0051 |
| <i>Hydrocotyle hookeri</i> subsp. <i>chinensis</i>       | <i>Hydrocotyle sibthorpioides</i> var. <i>batrachium</i> | 0.0024 | 0.0051 |
| <i>Hydrocotyle nepalensis</i>                            | <i>Hydrocotyle sibthorpioides</i> var. <i>batrachium</i> | 0.0024 | 0.0051 |
| <i>Hydrocotyle pseudoconferta</i>                        | <i>Hydrocotyle sibthorpioides</i> var. <i>batrachium</i> | 0.0024 | 0.0051 |
| <i>Hydrocotyle sibthorpioides</i>                        | <i>Hydrocotyle sibthorpioides</i> var. <i>batrachium</i> | 0.0008 | 0.0022 |
| <i>Hydrocotyle sibthorpioides_NC_035502</i>              | <i>Hydrocotyle sibthorpioides</i> var. <i>batrachium</i> | 0.0008 | 0.0022 |

**Table S8. Details for the Ka and Ks values of three protein-coding sequences (*rpl16*, *rpl20*, *rps16*) with some Ka/Ks  $\geq 1$ .**

### 1. Ka and Ks of *rpl16*

| Seq 1                        | Seq 2                                              | Ka | Ks |
|------------------------------|----------------------------------------------------|----|----|
| <i>Hydrocotyle dielsiana</i> | <i>Hydrocotyle hookeri</i> subsp. <i>chinensis</i> | 0  | 0  |
| <i>Hydrocotyle dielsiana</i> | <i>Hydrocotyle nepalensis</i>                      | 0  | 0  |
| <i>Hydrocotyle dielsiana</i> | <i>Hydrocotyle pseudoconferta</i>                  | 0  | 0  |

|                                                          |                                                          |        |        |
|----------------------------------------------------------|----------------------------------------------------------|--------|--------|
| <i>Hydrocotyle dielsiana</i>                             | <i>Hydrocotyle sibthorpioides</i> var. <i>batrachium</i> | 0.0066 | 0      |
| <i>Hydrocotyle hookeri</i> subsp. <i>chinensis</i>       | <i>Hydrocotyle nepalensis</i>                            | 0      | 0      |
| <i>Hydrocotyle hookeri</i> subsp. <i>chinensis</i>       | <i>Hydrocotyle pseudoconferta</i>                        | 0      | 0      |
| <i>Hydrocotyle hookeri</i> subsp. <i>chinensis</i>       | <i>Hydrocotyle sibthorpioides</i> var. <i>batrachium</i> | 0.0066 | 0      |
| <i>Hydrocotyle nepalensis</i>                            | <i>Hydrocotyle pseudoconferta</i>                        | 0      | 0      |
| <i>Hydrocotyle nepalensis</i>                            | <i>Hydrocotyle sibthorpioides</i> var. <i>batrachium</i> | 0.0066 | 0      |
| <i>Hydrocotyle pseudoconferta</i>                        | <i>Hydrocotyle sibthorpioides</i> var. <i>batrachium</i> | 0.0066 | 0      |
| <i>Hydrocotyle sibthorpioides</i>                        | <i>Hydrocotyle sibthorpioides</i> _NC_035502             | 0      | 0      |
| <i>Hydrocotyle dielsiana</i>                             | <i>Hydrocotyle sibthorpioides</i>                        | 0.01   | 0.0098 |
| <i>Hydrocotyle dielsiana</i>                             | <i>Hydrocotyle sibthorpioides</i> _NC_035502             | 0.01   | 0.0098 |
| <i>Hydrocotyle hookeri</i> subsp. <i>chinensis</i>       | <i>Hydrocotyle sibthorpioides</i>                        | 0.01   | 0.0098 |
| <i>Hydrocotyle hookeri</i> subsp. <i>chinensis</i>       | <i>Hydrocotyle sibthorpioides</i> _NC_035502             | 0.01   | 0.0098 |
| <i>Hydrocotyle nepalensis</i>                            | <i>Hydrocotyle sibthorpioides</i>                        | 0.01   | 0.0098 |
| <i>Hydrocotyle nepalensis</i>                            | <i>Hydrocotyle sibthorpioides</i> _NC_035502             | 0.01   | 0.0098 |
| <i>Hydrocotyle pseudoconferta</i>                        | <i>Hydrocotyle sibthorpioides</i>                        | 0.01   | 0.0098 |
| <i>Hydrocotyle pseudoconferta</i>                        | <i>Hydrocotyle sibthorpioides</i> _NC_035502             | 0.01   | 0.0098 |
| <i>Hydrocotyle sibthorpioides</i>                        | <i>Hydrocotyle sibthorpioides</i> var. <i>batrachium</i> | 0.0033 | 0.0098 |
| <i>Hydrocotyle sibthorpioides</i> _NC_035502             | <i>Hydrocotyle sibthorpioides</i> var. <i>batrachium</i> | 0.0033 | 0.0098 |
| <i>Hydrocotyle leucocephala</i>                          | <i>Hydrocotyle sibthorpioides</i>                        | 0.0066 | 0.0298 |
| <i>Hydrocotyle leucocephala</i>                          | <i>Hydrocotyle sibthorpioides</i> _NC_035502             | 0.0066 | 0.0298 |
| <i>Hydrocotyle leucocephala</i>                          | <i>Hydrocotyle sibthorpioides</i> var. <i>batrachium</i> | 0.0033 | 0.0197 |
| <i>Hydrocotyle dielsiana</i>                             | <i>Hydrocotyle leucocephala</i>                          | 0.0033 | 0.0198 |
| <i>Hydrocotyle hookeri</i> subsp. <i>chinensis</i>       | <i>Hydrocotyle leucocephala</i>                          | 0.0033 | 0.0198 |
| <i>Hydrocotyle leucocephala</i>                          | <i>Hydrocotyle nepalensis</i>                            | 0.0033 | 0.0198 |
| <i>Hydrocotyle leucocephala</i>                          | <i>Hydrocotyle pseudoconferta</i>                        | 0.0033 | 0.0198 |
| <i>Hydrocotyle sibthorpioides</i>                        | <i>Hydrocotyle verticillata</i> _NC_015818               | 0.0066 | 0.0399 |
| <i>Hydrocotyle sibthorpioides</i> _NC_035502             | <i>Hydrocotyle verticillata</i> _NC_015818               | 0.0066 | 0.0399 |
| <i>Hydrocotyle sibthorpioides</i>                        | <i>Hydrocotyle verticillata</i>                          | 0.0066 | 0.0503 |
| <i>Hydrocotyle sibthorpioides</i> _NC_035502             | <i>Hydrocotyle verticillata</i>                          | 0.0066 | 0.0503 |
| <i>Hydrocotyle sibthorpioides</i> var. <i>batrachium</i> | <i>Hydrocotyle verticillata</i> _NC_015818               | 0.0033 | 0.0298 |
| <i>Hydrocotyle dielsiana</i>                             | <i>Hydrocotyle verticillata</i> _NC_015818               | 0.0033 | 0.0299 |
| <i>Hydrocotyle hookeri</i> subsp. <i>chinensis</i>       | <i>Hydrocotyle verticillata</i> _NC_015818               | 0.0033 | 0.0299 |
| <i>Hydrocotyle nepalensis</i>                            | <i>Hydrocotyle verticillata</i> _NC_015818               | 0.0033 | 0.0299 |
| <i>Hydrocotyle pseudoconferta</i>                        | <i>Hydrocotyle verticillata</i> _NC_015818               | 0.0033 | 0.0299 |
| <i>Hydrocotyle sibthorpioides</i> var. <i>batrachium</i> | <i>Hydrocotyle verticillata</i>                          | 0.0033 | 0.0399 |
| <i>Hydrocotyle dielsiana</i>                             | <i>Hydrocotyle verticillata</i>                          | 0.0033 | 0.0401 |
| <i>Hydrocotyle hookeri</i> subsp. <i>chinensis</i>       | <i>Hydrocotyle verticillata</i>                          | 0.0033 | 0.0401 |
| <i>Hydrocotyle nepalensis</i>                            | <i>Hydrocotyle verticillata</i>                          | 0.0033 | 0.0401 |
| <i>Hydrocotyle pseudoconferta</i>                        | <i>Hydrocotyle verticillata</i>                          | 0.0033 | 0.0401 |
| <i>Hydrocotyle leucocephala</i>                          | <i>Hydrocotyle verticillata</i>                          | 0      | 0.0197 |
| <i>Hydrocotyle leucocephala</i>                          | <i>Hydrocotyle verticillata</i> _NC_015818               | 0      | 0.0098 |
| <i>Hydrocotyle verticillata</i>                          | <i>Hydrocotyle verticillata</i> _NC_015818               | 0      | 0.0098 |

## 2. Ka and Ks of *rpl20*

| Seq 1                        | Seq 2                                              | Ka     | Ks |
|------------------------------|----------------------------------------------------|--------|----|
| <i>Hydrocotyle dielsiana</i> | <i>Hydrocotyle hookeri</i> subsp. <i>chinensis</i> | 0      | 0  |
| <i>Hydrocotyle dielsiana</i> | <i>Hydrocotyle leucocephala</i>                    | 0.0101 | 0  |
| <i>Hydrocotyle dielsiana</i> | <i>Hydrocotyle nepalensis</i>                      | 0      | 0  |
| <i>Hydrocotyle dielsiana</i> | <i>Hydrocotyle pseudoconferta</i>                  | 0      | 0  |
| <i>Hydrocotyle dielsiana</i> | <i>Hydrocotyle verticillata</i>                    | 0.0034 | 0  |

|                                                          |                                                          |        |        |
|----------------------------------------------------------|----------------------------------------------------------|--------|--------|
| <i>Hydrocotyle dielsiana</i>                             | <i>Hydrocotyle verticillata_NC_015818</i>                | 0.0034 | 0      |
| <i>Hydrocotyle hookeri</i> subsp. <i>chinensis</i>       | <i>Hydrocotyle leucocephala</i>                          | 0.0101 | 0      |
| <i>Hydrocotyle hookeri</i> subsp. <i>chinensis</i>       | <i>Hydrocotyle nepalensis</i>                            | 0      | 0      |
| <i>Hydrocotyle hookeri</i> subsp. <i>chinensis</i>       | <i>Hydrocotyle pseudoconferta</i>                        | 0      | 0      |
| <i>Hydrocotyle hookeri</i> subsp. <i>chinensis</i>       | <i>Hydrocotyle verticillata</i>                          | 0.0034 | 0      |
| <i>Hydrocotyle hookeri</i> subsp. <i>chinensis</i>       | <i>Hydrocotyle verticillata_NC_015818</i>                | 0.0034 | 0      |
| <i>Hydrocotyle leucocephala</i>                          | <i>Hydrocotyle nepalensis</i>                            | 0.0101 | 0      |
| <i>Hydrocotyle leucocephala</i>                          | <i>Hydrocotyle pseudoconferta</i>                        | 0.0101 | 0      |
| <i>Hydrocotyle leucocephala</i>                          | <i>Hydrocotyle verticillata</i>                          | 0.0067 | 0      |
| <i>Hydrocotyle leucocephala</i>                          | <i>Hydrocotyle verticillata_NC_015818</i>                | 0.0067 | 0      |
| <i>Hydrocotyle nepalensis</i>                            | <i>Hydrocotyle pseudoconferta</i>                        | 0      | 0      |
| <i>Hydrocotyle nepalensis</i>                            | <i>Hydrocotyle verticillata</i>                          | 0.0034 | 0      |
| <i>Hydrocotyle nepalensis</i>                            | <i>Hydrocotyle verticillata_NC_015818</i>                | 0.0034 | 0      |
| <i>Hydrocotyle pseudoconferta</i>                        | <i>Hydrocotyle verticillata</i>                          | 0.0034 | 0      |
| <i>Hydrocotyle pseudoconferta</i>                        | <i>Hydrocotyle verticillata_NC_015818</i>                | 0.0034 | 0      |
| <i>Hydrocotyle sibthorpioides</i>                        | <i>Hydrocotyle sibthorpioides_NC_035502</i>              | 0      | 0      |
| <i>Hydrocotyle verticillata</i>                          | <i>Hydrocotyle verticillata_NC_015818</i>                | 0      | 0      |
| <i>Hydrocotyle leucocephala</i>                          | <i>Hydrocotyle sibthorpioides</i> var. <i>batrachium</i> | 0.0136 | 0.0112 |
| <i>Hydrocotyle leucocephala</i>                          | <i>Hydrocotyle sibthorpioides</i>                        | 0.0101 | 0.0113 |
| <i>Hydrocotyle leucocephala</i>                          | <i>Hydrocotyle sibthorpioides_NC_035502</i>              | 0.0101 | 0.0113 |
| <i>Hydrocotyle sibthorpioides</i> var. <i>batrachium</i> | <i>Hydrocotyle verticillata</i>                          | 0.0068 | 0.0112 |
| <i>Hydrocotyle sibthorpioides</i> var. <i>batrachium</i> | <i>Hydrocotyle verticillata_NC_015818</i>                | 0.0068 | 0.0112 |
| <i>Hydrocotyle dielsiana</i>                             | <i>Hydrocotyle sibthorpioides</i> var. <i>batrachium</i> | 0.0034 | 0.0112 |
| <i>Hydrocotyle hookeri</i> subsp. <i>chinensis</i>       | <i>Hydrocotyle sibthorpioides</i> var. <i>batrachium</i> | 0.0034 | 0.0112 |
| <i>Hydrocotyle nepalensis</i>                            | <i>Hydrocotyle sibthorpioides</i> var. <i>batrachium</i> | 0.0034 | 0.0112 |
| <i>Hydrocotyle pseudoconferta</i>                        | <i>Hydrocotyle sibthorpioides</i> var. <i>batrachium</i> | 0.0034 | 0.0112 |
| <i>Hydrocotyle sibthorpioides</i>                        | <i>Hydrocotyle verticillata</i>                          | 0.0034 | 0.0113 |
| <i>Hydrocotyle sibthorpioides</i>                        | <i>Hydrocotyle verticillata_NC_015818</i>                | 0.0034 | 0.0113 |
| <i>Hydrocotyle sibthorpioides_NC_035502</i>              | <i>Hydrocotyle verticillata</i>                          | 0.0034 | 0.0113 |
| <i>Hydrocotyle sibthorpioides_NC_035502</i>              | <i>Hydrocotyle verticillata_NC_015818</i>                | 0.0034 | 0.0113 |
| <i>Hydrocotyle sibthorpioides</i>                        | <i>Hydrocotyle sibthorpioides</i> var. <i>batrachium</i> | 0.0034 | 0.0226 |
| <i>Hydrocotyle sibthorpioides_NC_035502</i>              | <i>Hydrocotyle sibthorpioides</i> var. <i>batrachium</i> | 0.0034 | 0.0226 |
| <i>Hydrocotyle dielsiana</i>                             | <i>Hydrocotyle sibthorpioides</i>                        | 0      | 0.0113 |
| <i>Hydrocotyle dielsiana</i>                             | <i>Hydrocotyle sibthorpioides_NC_035502</i>              | 0      | 0.0113 |
| <i>Hydrocotyle hookeri</i> subsp. <i>chinensis</i>       | <i>Hydrocotyle sibthorpioides</i>                        | 0      | 0.0113 |
| <i>Hydrocotyle hookeri</i> subsp. <i>chinensis</i>       | <i>Hydrocotyle sibthorpioides_NC_035502</i>              | 0      | 0.0113 |
| <i>Hydrocotyle nepalensis</i>                            | <i>Hydrocotyle sibthorpioides</i>                        | 0      | 0.0113 |
| <i>Hydrocotyle nepalensis</i>                            | <i>Hydrocotyle sibthorpioides_NC_035502</i>              | 0      | 0.0113 |
| <i>Hydrocotyle pseudoconferta</i>                        | <i>Hydrocotyle sibthorpioides</i>                        | 0      | 0.0113 |
| <i>Hydrocotyle pseudoconferta</i>                        | <i>Hydrocotyle sibthorpioides_NC_035502</i>              | 0      | 0.0113 |

### 3. Ka and Ks of *rps16*

| Seq 1                                              | Seq 2                                              | Ka     | Ks |
|----------------------------------------------------|----------------------------------------------------|--------|----|
| <i>Hydrocotyle dielsiana</i>                       | <i>Hydrocotyle hookeri</i> subsp. <i>chinensis</i> | 0      | 0  |
| <i>Hydrocotyle dielsiana</i>                       | <i>Hydrocotyle nepalensis</i>                      | 0      | 0  |
| <i>Hydrocotyle dielsiana</i>                       | <i>Hydrocotyle pseudoconferta</i>                  | 0      | 0  |
| <i>Hydrocotyle hookeri</i> subsp. <i>chinensis</i> | <i>Hydrocotyle nepalensis</i>                      | 0      | 0  |
| <i>Hydrocotyle hookeri</i> subsp. <i>chinensis</i> | <i>Hydrocotyle pseudoconferta</i>                  | 0      | 0  |
| <i>Hydrocotyle leucocephala</i>                    | <i>Hydrocotyle verticillata</i>                    | 0.0116 | 0  |
| <i>Hydrocotyle leucocephala</i>                    | <i>Hydrocotyle verticillata_NC_015818</i>          | 0.0058 | 0  |

|                                                          |                                                          |        |        |
|----------------------------------------------------------|----------------------------------------------------------|--------|--------|
| <i>Hydrocotyle nepalensis</i>                            | <i>Hydrocotyle pseudoconferta</i>                        | 0      | 0      |
| <i>Hydrocotyle sibthorpioides</i>                        | <i>Hydrocotyle sibthorpioides_NC_035502</i>              | 0      | 0      |
| <i>Hydrocotyle verticillata</i>                          | <i>Hydrocotyle verticillata_NC_015818</i>                | 0.0058 | 0      |
| <i>Hydrocotyle sibthorpioides</i>                        | <i>Hydrocotyle verticillata</i>                          | 0.0174 | 0.0169 |
| <i>Hydrocotyle sibthorpioides_NC_035502</i>              | <i>Hydrocotyle verticillata</i>                          | 0.0174 | 0.0169 |
| <i>Hydrocotyle sibthorpioides</i>                        | <i>Hydrocotyle verticillata_NC_015818</i>                | 0.0116 | 0.0169 |
| <i>Hydrocotyle sibthorpioides_NC_035502</i>              | <i>Hydrocotyle verticillata_NC_015818</i>                | 0.0116 | 0.0169 |
| <i>Hydrocotyle dielsiana</i>                             | <i>Hydrocotyle verticillata</i>                          | 0.0116 | 0.017  |
| <i>Hydrocotyle hookeri</i> subsp. <i>chinensis</i>       | <i>Hydrocotyle verticillata</i>                          | 0.0116 | 0.017  |
| <i>Hydrocotyle nepalensis</i>                            | <i>Hydrocotyle verticillata</i>                          | 0.0116 | 0.017  |
| <i>Hydrocotyle pseudoconferta</i>                        | <i>Hydrocotyle verticillata</i>                          | 0.0116 | 0.017  |
| <i>Hydrocotyle dielsiana</i>                             | <i>Hydrocotyle verticillata_NC_015818</i>                | 0.0058 | 0.0169 |
| <i>Hydrocotyle hookeri</i> subsp. <i>chinensis</i>       | <i>Hydrocotyle verticillata_NC_015818</i>                | 0.0058 | 0.0169 |
| <i>Hydrocotyle leucocephala</i>                          | <i>Hydrocotyle sibthorpioides</i>                        | 0.0058 | 0.0169 |
| <i>Hydrocotyle leucocephala</i>                          | <i>Hydrocotyle sibthorpioides_NC_035502</i>              | 0.0058 | 0.0169 |
| <i>Hydrocotyle nepalensis</i>                            | <i>Hydrocotyle verticillata_NC_015818</i>                | 0.0058 | 0.0169 |
| <i>Hydrocotyle pseudoconferta</i>                        | <i>Hydrocotyle verticillata_NC_015818</i>                | 0.0058 | 0.0169 |
| <i>Hydrocotyle sibthorpioides</i>                        | <i>Hydrocotyle sibthorpioides</i> var. <i>batrachium</i> | 0.0058 | 0.0169 |
| <i>Hydrocotyle sibthorpioides_NC_035502</i>              | <i>Hydrocotyle sibthorpioides</i> var. <i>batrachium</i> | 0.0058 | 0.0169 |
| <i>Hydrocotyle sibthorpioides</i> var. <i>batrachium</i> | <i>Hydrocotyle verticillata</i>                          | 0.0116 | 0.0343 |
| <i>Hydrocotyle dielsiana</i>                             | <i>Hydrocotyle sibthorpioides</i>                        | 0.0058 | 0.0341 |
| <i>Hydrocotyle dielsiana</i>                             | <i>Hydrocotyle sibthorpioides_NC_035502</i>              | 0.0058 | 0.0341 |
| <i>Hydrocotyle hookeri</i> subsp. <i>chinensis</i>       | <i>Hydrocotyle sibthorpioides</i>                        | 0.0058 | 0.0341 |
| <i>Hydrocotyle hookeri</i> subsp. <i>chinensis</i>       | <i>Hydrocotyle sibthorpioides_NC_035502</i>              | 0.0058 | 0.0341 |
| <i>Hydrocotyle nepalensis</i>                            | <i>Hydrocotyle sibthorpioides</i>                        | 0.0058 | 0.0341 |
| <i>Hydrocotyle nepalensis</i>                            | <i>Hydrocotyle sibthorpioides_NC_035502</i>              | 0.0058 | 0.0341 |
| <i>Hydrocotyle pseudoconferta</i>                        | <i>Hydrocotyle sibthorpioides</i>                        | 0.0058 | 0.0341 |
| <i>Hydrocotyle pseudoconferta</i>                        | <i>Hydrocotyle sibthorpioides_NC_035502</i>              | 0.0058 | 0.0341 |
| <i>Hydrocotyle sibthorpioides</i> var. <i>batrachium</i> | <i>Hydrocotyle verticillata_NC_015818</i>                | 0.0058 | 0.0343 |
| <i>Hydrocotyle dielsiana</i>                             | <i>Hydrocotyle leucocephala</i>                          | 0      | 0.0169 |
| <i>Hydrocotyle dielsiana</i>                             | <i>Hydrocotyle sibthorpioides</i> var. <i>batrachium</i> | 0      | 0.052  |
| <i>Hydrocotyle hookeri</i> subsp. <i>chinensis</i>       | <i>Hydrocotyle leucocephala</i>                          | 0      | 0.0169 |
| <i>Hydrocotyle hookeri</i> subsp. <i>chinensis</i>       | <i>Hydrocotyle sibthorpioides</i> var. <i>batrachium</i> | 0      | 0.052  |
| <i>Hydrocotyle leucocephala</i>                          | <i>Hydrocotyle nepalensis</i>                            | 0      | 0.0169 |
| <i>Hydrocotyle leucocephala</i>                          | <i>Hydrocotyle pseudoconferta</i>                        | 0      | 0.0169 |
| <i>Hydrocotyle leucocephala</i>                          | <i>Hydrocotyle sibthorpioides</i> var. <i>batrachium</i> | 0      | 0.0343 |
| <i>Hydrocotyle nepalensis</i>                            | <i>Hydrocotyle sibthorpioides</i> var. <i>batrachium</i> | 0      | 0.052  |
| <i>Hydrocotyle pseudoconferta</i>                        | <i>Hydrocotyle sibthorpioides</i> var. <i>batrachium</i> | 0      | 0.052  |



**Table S9. The potential positive selection test on difference taxa within *Hydrocotyle*. Abbreviations of the foreground branch are shown at the end of the table.**

| Gene name    | foreground branch | Null hypothesis |    |                      | Alternative hypothesis |    |                      | Significance test                                                                                                                                                                                                                        | LRT P-value        |
|--------------|-------------------|-----------------|----|----------------------|------------------------|----|----------------------|------------------------------------------------------------------------------------------------------------------------------------------------------------------------------------------------------------------------------------------|--------------------|
|              |                   | lnL             | np | omega ( $\omega=1$ ) | lnL                    | np | omega ( $\omega>1$ ) |                                                                                                                                                                                                                                          |                    |
| <i>ycf1a</i> | SB                | -8957.464189    | 21 | 1                    | -8964.793288           | 22 | 1                    | 1466 H 0.710,1531 D 0.529,1710 R 0.684                                                                                                                                                                                                   | <b>0.000128873</b> |
| <i>ycf1a</i> | Clade I           | -8959.775828    | 21 | 1                    | -8963.147371           | 22 | 1                    |                                                                                                                                                                                                                                          | <b>0.009411169</b> |
| <i>matK</i>  | L                 | -2371.269118    | 21 | 1                    | -2369.127683           | 22 | 109.43917            | <b>116 L 0.987*,151 V 0.987*,166 V 0.987*,297 K 0.988*, 320 I 0.988*,327 N 0.988*,409 R 0.988*,411 C 0.988*,486 R 0.988*</b>                                                                                                             | <b>0.038498292</b> |
| <i>atpE</i>  | NM                | -731.899704     | 21 | 1                    | -730.328767            | 22 | 999.00000            | <b>54 L 0.957*,73 N 0.962*,92 L 0.965*</b> ,105 D 0.949,129 I 0.947, <b>144 N 0.965*</b>                                                                                                                                                 | 0.076306088        |
| <i>ycf2</i>  | NM                | -8836.736895    | 21 | 1                    | -8835.570713           | 22 | 107.70649            | <b>127 G 0.964*, 223 E 0.962*, 274 T 0.962*, 1251 K 0.961*, 1573 D 0.962*</b>                                                                                                                                                            | 0.126709323        |
| <i>ycf1b</i> | SB                | -1215.809396    | 21 | 1                    | -1215.126851           | 22 | 186.78628            | 245 I 0.909, 253 P 0.928, 258 K 0.922,                                                                                                                                                                                                   | 0.242657284        |
| <i>rpoA</i>  | Clade I           | -1564.874004    | 21 | 1                    | -1564.196201           | 22 | 999.00000            | 118 S 0.831, 217 Y 0.757                                                                                                                                                                                                                 | 0.244300454        |
| <i>psbH</i>  | S                 | -311.81039      | 21 | 1                    | -311.302282            | 22 | 999.00000            | 9 D 0.927, 19 I 0.927                                                                                                                                                                                                                    | 0.313418269        |
| <i>rpl20</i> | L                 | -544.502374     | 21 | 1                    | -544.084612            | 22 | 999.00000            | 99 Q 0.923, 120 V 0.923                                                                                                                                                                                                                  | 0.360680055        |
| <i>psaI</i>  | NM                | -147.549381     | 21 | 1                    | -147.204025            | 22 | 999.00000            | 27 F 0.792                                                                                                                                                                                                                               | 0.405922309        |
| <i>rpl2</i>  | SB                | -1100.472519    | 21 | 1                    | -1100.138638           | 22 | 999.00000            | 12 S 0.800                                                                                                                                                                                                                               | 0.413832965        |
| <i>rps16</i> | S                 | -344.692246     | 21 | 1                    | -344.455527            | 22 | 999.00000            |                                                                                                                                                                                                                                          | 0.491409765        |
| <i>rpl23</i> | L                 | -374.905141     | 21 | 1                    | -374.733331            | 22 | 999.00000            | 39 V 0.800                                                                                                                                                                                                                               | 0.557747105        |
| <i>rpl16</i> | SB                | -576.024885     | 21 | 1                    | -575.857576            | 22 | 999.00000            | 26 N 0.710                                                                                                                                                                                                                               | 0.562952412        |
| <i>rpl16</i> | Clade I           | -576.031768     | 21 | 1                    | -575.866143            | 22 | 999.00000            |                                                                                                                                                                                                                                          | 0.564923968        |
| <i>rpoA</i>  | NM                | -1565.455264    | 21 | 1                    | -1565.455264           | 22 | 999.00000            | 53 V 0.514,110 Q 0.509,280 Q 0.514,290 P 0.508,495 N 0.508,588 F 0.507,602 S 0.513,765 K 0.509,869 R 0.510,891 V 0.509,912 E 0.509,936 N 0.514,991 S 0.513,1053 P 0.507,1124 Y 0.505,1545 V 0.511,1612 K 0.511,1650 K 0.511,1656 T 0.511 | 0.573894248        |
| <i>ycf1a</i> | NM                | -8956.461261    | 21 | 1                    | -8956.386989           | 22 | 2.02733              |                                                                                                                                                                                                                                          | 0.699930665        |
| <i>ccsA</i>  | SB                | -1409.328591    | 21 | 1                    | -1409.328591           | 22 | 1                    | 23 T 0.573, 175 G 0.573                                                                                                                                                                                                                  | 1                  |

|              |         |              |    |   |              |    |           |                                   |             |
|--------------|---------|--------------|----|---|--------------|----|-----------|-----------------------------------|-------------|
| <i>ycf1b</i> | NM      | -1216.031855 | 21 | 1 | -1215.572739 | 22 | 999.00000 | 53 V 0.660,110 Q 0.686            | 0.337939620 |
| <i>ycf15</i> | Vnewly  | -272.882619  | 21 | 1 | -272.472137  | 22 | 999.00000 | 53 H 0.800                        | 0.364898466 |
| <i>rps16</i> | Vnewly  | -344.677385  | 21 | 1 | -344.432454  | 22 | 999.00000 | 47 C 0.884                        | 0.483988870 |
| <i>matK</i>  | Snewly  | -2373.310502 | 21 | 1 | -2373.071580 | 22 | 80.86109  | 294 L 0.852                       | 0.489400522 |
| <i>rpl20</i> | NM      | -544.884103  | 21 | 1 | -544.674492  | 22 | 999.00000 | 51 D 0.835                        | 0.517325507 |
| <i>ccsA</i>  | Vnewly  | -1408.998164 | 21 | 1 | -1408.801675 | 22 | 73.56551  | 282 I 0.904                       | 0.530738178 |
| <i>ycf1b</i> | B       | -1216.488937 | 21 | 1 | -1216.300815 | 22 | 3.78136   |                                   | 0.539620271 |
| <i>rpoA</i>  | V       | -1565.619441 | 21 | 1 | -1565.601047 | 22 | 74.80511  |                                   | 0.847897319 |
| <i>rpl20</i> | Clade I | -545.129318  | 21 | 1 | -545.129271  | 22 | 3.21929   |                                   | 0.992264343 |
| <i>matK</i>  | V       | -2373.445624 | 21 | 1 | -2373.445643 | 22 | 1         | 16 H 0.539,30 A 0.538,474 S 0.537 | 0.995081540 |
| <i>ccsA</i>  | Vold    | -1409.477750 | 21 | 1 | -1409.477758 | 22 | 3.90512   |                                   | 0.996808470 |
| <i>ycf2</i>  | SB      | -8837.198294 | 21 | 1 | -8837.198291 | 22 | 1         |                                   | 0.998045592 |
| <i>matK</i>  | S       | -2373.570525 | 21 | 1 | -2373.570527 | 22 | 3.17203   |                                   | 0.998404232 |
| <i>matK</i>  | Clade I | -2373.570520 | 21 | 1 | -2373.570520 | 22 | 1         |                                   | 1           |
| <i>psbH</i>  | B       | -312.752334  | 21 | 1 | -312.752334  | 22 | 3.48470   |                                   | 1.000000000 |

### foreground branch abbreviation:

| Taxa                                                                                                                                                  | Branch  |
|-------------------------------------------------------------------------------------------------------------------------------------------------------|---------|
| <i>Hydrocotyle leucocephala</i>                                                                                                                       | L       |
| <i>Hydrocotyle verticillata</i> (two taxa)                                                                                                            | V       |
| <i>Hydrocotyle leucocephala</i> + <i>Hydrocotyle verticillata</i>                                                                                     | NM      |
| <i>Hydrocotyle sibthorpioides</i> + <i>Hydrocotyle sibthorpioides</i> var. <i>batrachium</i>                                                          | SB      |
| <i>Hydrocotyle sibthorpioides</i> var. <i>batrachium</i>                                                                                              | B       |
| <i>Hydrocotyle sibthorpioides</i>                                                                                                                     | S       |
| <i>Hydrocotyle dielsiana</i> + <i>Hydrocotyle hookeri</i> subsp. <i>chinensis</i> + <i>Hydrocotyle pseudoconferta</i> + <i>Hydrocotyle nepalensis</i> | Clade I |
| <i>Hydrocotyle verticillata</i> (OR767312)                                                                                                            | Vnewly  |
| <i>Hydrocotyle sibthorpioides</i> (OR767311)                                                                                                          | Snewly  |
| <i>Hydrocotyle verticillata</i> (NC_015818)                                                                                                           | Vold    |

**Table S10. The potential positive selection test on *Hydrocotyle*.**

| Gene name    | Null hypothesis |    |                      | Alternative hypothesis |    |                      | Significance test<br>Positively selected sites (BEB, *: P > 95%; **: P > 99%)                                                                                                                                                                                                                                                                                                                                                           | LRT P-value        |
|--------------|-----------------|----|----------------------|------------------------|----|----------------------|-----------------------------------------------------------------------------------------------------------------------------------------------------------------------------------------------------------------------------------------------------------------------------------------------------------------------------------------------------------------------------------------------------------------------------------------|--------------------|
|              | lnL             | np | omega ( $\omega=1$ ) | lnL                    | np | omega ( $\omega>1$ ) |                                                                                                                                                                                                                                                                                                                                                                                                                                         |                    |
| <i>ycf1b</i> | -3362.447725    | 59 | 1                    | -3324.388401           | 60 | 999.00000            | 32 M 0.542,64 A 0.803,167 I 0.807,199 R 0.521,229 S 0.802,321 - 0.794,327 E 0.514, <b>328 R 0.991**</b> , <b>329 L 0.994**</b> , <b>330 I 0.996**</b> , <b>331 H 0.997**</b> ,332 K 0.779,333 T 0.809, <b>334 N 0.976*</b> , <b>336 R 0.986*</b> , <b>337 K 0.988*</b> ,338 D 0.775,339 K 0.794, <b>450 R 0.986*</b> ,451 C 0.589,452 A 0.579, <b>453 R 0.984*</b> ,454 H 0.909, <b>455 L 0.977*</b> , <b>456 Q 0.976*</b> ,457 I 0.820 | <b>0.000000000</b> |
| <i>matK</i>  | -7024.419554    | 59 | 1                    | -7011.441104           | 60 | 29.49559             | 35 H 0.830, <b>81 N 0.963*</b> ,325 R 0.717,360 S 0.537, <b>494 Y 0.996**</b> ,495 R 0.939, <b>496 R 0.951*</b> , <b>513 E 0.970*</b>                                                                                                                                                                                                                                                                                                   | <b>0.000000349</b> |
| <i>atpF</i>  | -2046.963998    | 59 | 1                    | -2044.015786           | 60 | 75.02950             | 174 G 0.869                                                                                                                                                                                                                                                                                                                                                                                                                             | <b>0.015171658</b> |
| <i>accD</i>  | -5739.029672    | 59 | 1                    | -5736.265650           | 60 | 39.66167             | 51 D 0.920,506 K 0.557                                                                                                                                                                                                                                                                                                                                                                                                                  | <b>0.018714015</b> |
| <i>rps14</i> | -860.835744     | 59 | 1                    | -858.387320            | 60 | 77.06502             | 3 R 0.754, <b>37 L 0.965*</b>                                                                                                                                                                                                                                                                                                                                                                                                           | <b>0.026905763</b> |
| <i>psbB</i>  | -4035.081518    | 59 | 1                    | -4032.641959           | 60 | 33.47575             | 20 L 0.590,38 A 0.590,97 A 0.629, <b>98 G 0.957*</b> ,484 P 0.609,488 A 0.561,508 V 0.596                                                                                                                                                                                                                                                                                                                                               | <b>0.027183506</b> |
| <i>ndhC</i>  | -974.504146     | 59 | 1                    | -973.220870            | 60 | 66.51188             | 26 F 0.782                                                                                                                                                                                                                                                                                                                                                                                                                              | 0.109145397        |
| <i>atpA</i>  | -4410.682485    | 59 | 1                    | -4409.692489           | 60 | 9.60973              | 4 I 0.569,436 M 0.892,453 Q 0.566,472 F 0.569,483 T 0.598                                                                                                                                                                                                                                                                                                                                                                               | 0.159391250        |
| <i>ndhJ</i>  | -1304.653007    | 59 | 1                    | -1303.790559           | 60 | 6.60558              | <b>4 R 0.970*</b> ,26 I 0.627,75 E 0.631,118 L 0.651                                                                                                                                                                                                                                                                                                                                                                                    | 0.189064040        |
| <i>ycf2</i>  | -16102.821931   | 59 | 1                    | -16102.304497          | 60 | 6.08506              | 1428 P 0.708                                                                                                                                                                                                                                                                                                                                                                                                                            | 0.309018051        |
| <i>ycf1a</i> | -7210.491689    | 59 | 1                    | -7209.984768           | 60 | 8.60888              | 571 E 0.706                                                                                                                                                                                                                                                                                                                                                                                                                             | 0.313984171        |
| <i>ndhD</i>  | -5150.230460    | 59 | 1                    | -5149.884781           | 60 | 14.24887             | 366 I 0.503,368 T 0.743                                                                                                                                                                                                                                                                                                                                                                                                                 | 0.405702858        |
| <i>clpP</i>  | -1743.859192    | 59 | 1                    | -1743.613790           | 60 | 2.40664              | 11 R 0.829,12 S 0.866,42 E 0.835,75 I 0.535,79 A 0.880,80 I 0.887,106 I 0.856,135 A 0.597,168 V 0.597,197 E 0.546                                                                                                                                                                                                                                                                                                                       | 0.483568878        |
| <i>psbD</i>  | -2307.905544    | 59 | 1                    | -2307.717658           | 60 | 12.36849             | 8 F 0.657,12 E 0.658,13 K 0.697,18 I 0.547,137 V 0.596                                                                                                                                                                                                                                                                                                                                                                                  | 0.539874722        |
| <i>psbH</i>  | -684.179015     | 59 | 1                    | -683.997736            | 60 | 2.13697              | 23 L 0.565,30 Y 0.588                                                                                                                                                                                                                                                                                                                                                                                                                   | 0.547089009        |
| <i>psbK</i>  | -451.810040     | 59 | 1                    | -451.646047            | 60 | 45.94343             | 24 A 0.668                                                                                                                                                                                                                                                                                                                                                                                                                              | 0.566847418        |
| <i>atpE</i>  | -1578.065299    | 59 | 1                    | -1577.952681           | 60 | 1.92106              | 51 I 0.533,88 S 0.506                                                                                                                                                                                                                                                                                                                                                                                                                   | 0.635078986        |
| <i>rpl14</i> | -1120.974573    | 59 | 1                    | -1120.900704           | 60 | 11.73038             | 69 L 0.709                                                                                                                                                                                                                                                                                                                                                                                                                              | 0.700706447        |

|              |              |    |   |              |    |         |                                                                                                   |             |
|--------------|--------------|----|---|--------------|----|---------|---------------------------------------------------------------------------------------------------|-------------|
| <i>psbA</i>  | -2445.970241 | 59 | 1 | -2445.913547 | 60 | 5.13222 | 231 E 0.517                                                                                       | 0.736319431 |
| <i>ndhI</i>  | -1627.512291 | 59 | 1 | -1627.461357 | 60 | 2.49288 | 27 M 0.694,156 R 0.644                                                                            | 0.749599373 |
| <i>petD</i>  | -1283.929764 | 59 | 1 | -1283.903275 | 60 | 3.87165 | 153 K 0.562                                                                                       | 0.817960059 |
| <i>rpl20</i> | -1387.472995 | 59 | 1 | -1387.453148 | 60 | 2.05349 |                                                                                                   | 0.842080071 |
| <i>psbC</i>  | -3325.451540 | 59 | 1 | -3325.468203 | 60 | 1       |                                                                                                   | 0.855147901 |
| <i>psbZ</i>  | -405.747898  | 59 | 1 | -405.744690  | 60 | 4.04932 | 3 L 0.604                                                                                         | 0.936157772 |
| <i>ndhB</i>  | -2588.843751 | 59 | 1 | -2588.844217 | 60 | 1       |                                                                                                   | 0.975645425 |
| <i>rps12</i> | -877.523903  | 59 | 1 | -877.523820  | 60 | 1       |                                                                                                   | 0.989720261 |
| <i>rps19</i> | -823.346939  | 59 | 1 | -823.347020  | 60 | 1       |                                                                                                   | 0.989844862 |
| <i>rps7</i>  | -736.482887  | 59 | 1 | -736.482826  | 60 | 1       | 37 S 0.515                                                                                        | 0.991187256 |
| <i>psbN</i>  | -247.020621  | 59 | 1 | -247.020662  | 60 | 3.50786 |                                                                                                   | 0.992774947 |
| <i>rpl23</i> | -483.403453  | 59 | 1 | -483.403488  | 60 | 1       |                                                                                                   | 0.993324497 |
| <i>psbI</i>  | -235.071633  | 59 | 1 | -235.071659  | 60 | 1       |                                                                                                   | 0.994246422 |
| <i>petA</i>  | -3003.323881 | 59 | 1 | -3003.323876 | 60 | 1       |                                                                                                   | 0.997476872 |
| <i>rpoB</i>  | -9337.837508 | 59 | 1 | -9337.837509 | 60 | 1       | 29 D 0.584,59 Q 0.550,138 E 0.574,595 K 0.550,612 V 0.552,635 I<br>0.581,715 L 0.538,1028 I 0.584 | 0.998871621 |
| <i>rpoC1</i> | -6073.113542 | 59 | 1 | -6073.113541 | 60 | 1       | 4 N 0.509,22 V 0.512,80 N 0.518,83 V 0.506,193 T 0.504,219 I 0.549,432 V<br>0.512                 | 0.998871621 |
| <i>atpB</i>  | -4069.732139 | 59 | 1 | -4069.732139 | 60 | 1       |                                                                                                   | 1           |
| <i>atpH</i>  | -517.387894  | 59 | 1 | -517.387894  | 60 | 1       |                                                                                                   | 1           |
| <i>atpI</i>  | -2070.308397 | 59 | 1 | -2070.308397 | 60 | 1       | 156 K 0.542,212 V 0.517                                                                           | 1           |
| <i>cemA</i>  | -2295.242624 | 59 | 1 | -2295.242624 | 60 | 1       |                                                                                                   | 1           |
| <i>infA</i>  | -723.899930  | 59 | 1 | -723.899930  | 60 | 1       |                                                                                                   | 1           |
| <i>ndhA</i>  | -3619.645350 | 59 | 1 | -3619.645350 | 60 | 1       |                                                                                                   | 1           |
| <i>ndhE</i>  | -934.970106  | 59 | 1 | -934.970106  | 60 | 1       | 61 I 0.508                                                                                        | 1           |
| <i>ndhF</i>  | -9334.884802 | 59 | 1 | -9334.884802 | 60 | 1       |                                                                                                   | 1           |
| <i>ndhG</i>  | -1665.397645 | 59 | 1 | -1665.397645 | 60 | 1       | 165 V 0.561                                                                                       | 1           |
| <i>ndhH</i>  | -3687.152095 | 59 | 1 | -3687.152095 | 60 | 1       |                                                                                                   | 1           |
| <i>ndhK</i>  | -2009.710884 | 59 | 1 | -2009.710884 | 60 | 1       | 53 I 0.650,219 V 0.615,220 S 0.595                                                                | 1           |
| <i>petB</i>  | -1515.434641 | 59 | 1 | -1515.434641 | 60 | 1       |                                                                                                   | 1           |

|              |               |    |   |               |    |         |                                  |   |
|--------------|---------------|----|---|---------------|----|---------|----------------------------------|---|
| <i>petG</i>  | -292.475138   | 59 | 1 | -292.475138   | 60 | 1       |                                  | 1 |
| <i>petL</i>  | -285.946404   | 59 | 1 | -285.946404   | 60 | 3.72046 |                                  | 1 |
| <i>petN</i>  | -171.484866   | 59 | 1 | -171.484866   | 60 | 1       |                                  | 1 |
| <i>psaA</i>  | -5290.377579  | 59 | 1 | -5290.377579  | 60 | 1       |                                  | 1 |
| <i>psaB</i>  | -5020.303397  | 59 | 1 | -5020.303397  | 60 | 1       |                                  | 1 |
| <i>psaC</i>  | -558.974089   | 59 | 1 | -558.974089   | 60 | 1       |                                  | 1 |
| <i>psaJ</i>  | -320.391604   | 59 | 1 | -320.391604   | 60 | 1       |                                  | 1 |
| <i>psbE</i>  | -504.189886   | 59 | 1 | -504.189886   | 60 | 1       |                                  | 1 |
| <i>psbF</i>  | -216.400417   | 59 | 1 | -216.400417   | 60 | 1       |                                  | 1 |
| <i>psbJ</i>  | -262.260425   | 59 | 1 | -262.260425   | 60 | 1       |                                  | 1 |
| <i>psbL</i>  | -204.764289   | 59 | 1 | -204.764289   | 60 | 1       |                                  | 1 |
| <i>psbM</i>  | -362.721880   | 59 | 1 | -362.721880   | 60 | 1       |                                  | 1 |
| <i>psbT</i>  | -233.880612   | 59 | 1 | -233.880612   | 60 | 1       | 29 V 0.844,30 P 0.859,31 T 0.841 | 1 |
| <i>rbcL</i>  | -4352.660397  | 59 | 1 | -4352.660397  | 60 | 1       |                                  | 1 |
| <i>rpl22</i> | -1533.329343  | 59 | 1 | -1533.329343  | 60 | 1       |                                  | 1 |
| <i>rpl32</i> | -517.553873   | 59 | 1 | -517.553873   | 60 | 1       | 19 I 0.850,43 S 0.848            | 1 |
| <i>rpl33</i> | -663.657613   | 59 | 1 | -663.657613   | 60 | 1       | 53 P 0.504                       | 1 |
| <i>rpl36</i> | -281.042835   | 59 | 1 | -281.042835   | 60 | 1       |                                  | 1 |
| <i>rpoC2</i> | -14835.200435 | 59 | 1 | -14835.200435 | 60 | 1       |                                  | 1 |
| <i>rps2</i>  | -2031.807022  | 59 | 1 | -2031.807022  | 60 | 1       | 38 K 0.531,88 A 0.581            | 1 |
| <i>rps3</i>  | -2026.885794  | 59 | 1 | -2026.885794  | 60 | 1       |                                  | 1 |
| <i>rps4</i>  | -1683.600613  | 59 | 1 | -1683.600613  | 60 | 1       |                                  | 1 |
| <i>rps8</i>  | -1410.248265  | 59 | 1 | -1410.248265  | 60 | 1       |                                  | 1 |
| <i>rps11</i> | -1263.118779  | 59 | 1 | -1263.118779  | 60 | 1       | 14 G 0.523                       | 1 |
| <i>rps15</i> | -1180.016776  | 59 | 1 | -1180.016776  | 60 | 1       |                                  | 1 |
| <i>rps18</i> | -760.442968   | 59 | 1 | -760.442968   | 60 | 1       |                                  | 1 |
| <i>ycf3</i>  | -1184.251948  | 59 | 1 | -1184.251948  | 60 | 1       | 31 G 0.541                       | 1 |
| <i>ycf4</i>  | -1558.562482  | 59 | 1 | -1558.562482  | 60 | 1       |                                  | 1 |
| <i>ccsA</i>  | -3932.257478  | 59 | 1 | -3932.257478  | 60 | 1       | 204 R 0.506                      | 1 |

|              |              |    |   |              |    |   |   |
|--------------|--------------|----|---|--------------|----|---|---|
| <i>psaI</i>  | -352.680352  | 59 | 1 | -352.680352  | 60 | 1 | 1 |
| <i>rpl2</i>  | -1538.092630 | 59 | 1 | -1538.092630 | 60 | 1 | 1 |
| <i>rpl16</i> | -1154.372340 | 59 | 1 | -1154.372340 | 60 | 1 | 1 |
| <i>rpoA</i>  | -3585.863243 | 59 | 1 | -3585.863243 | 60 | 1 | 1 |
| <i>rps16</i> | -651.431732  | 57 | 1 | -651.431732  | 58 | 1 | 1 |

**Figure S1. MAUVE alignment of ten *Hydrocotyle* plastomes using Geneious.**

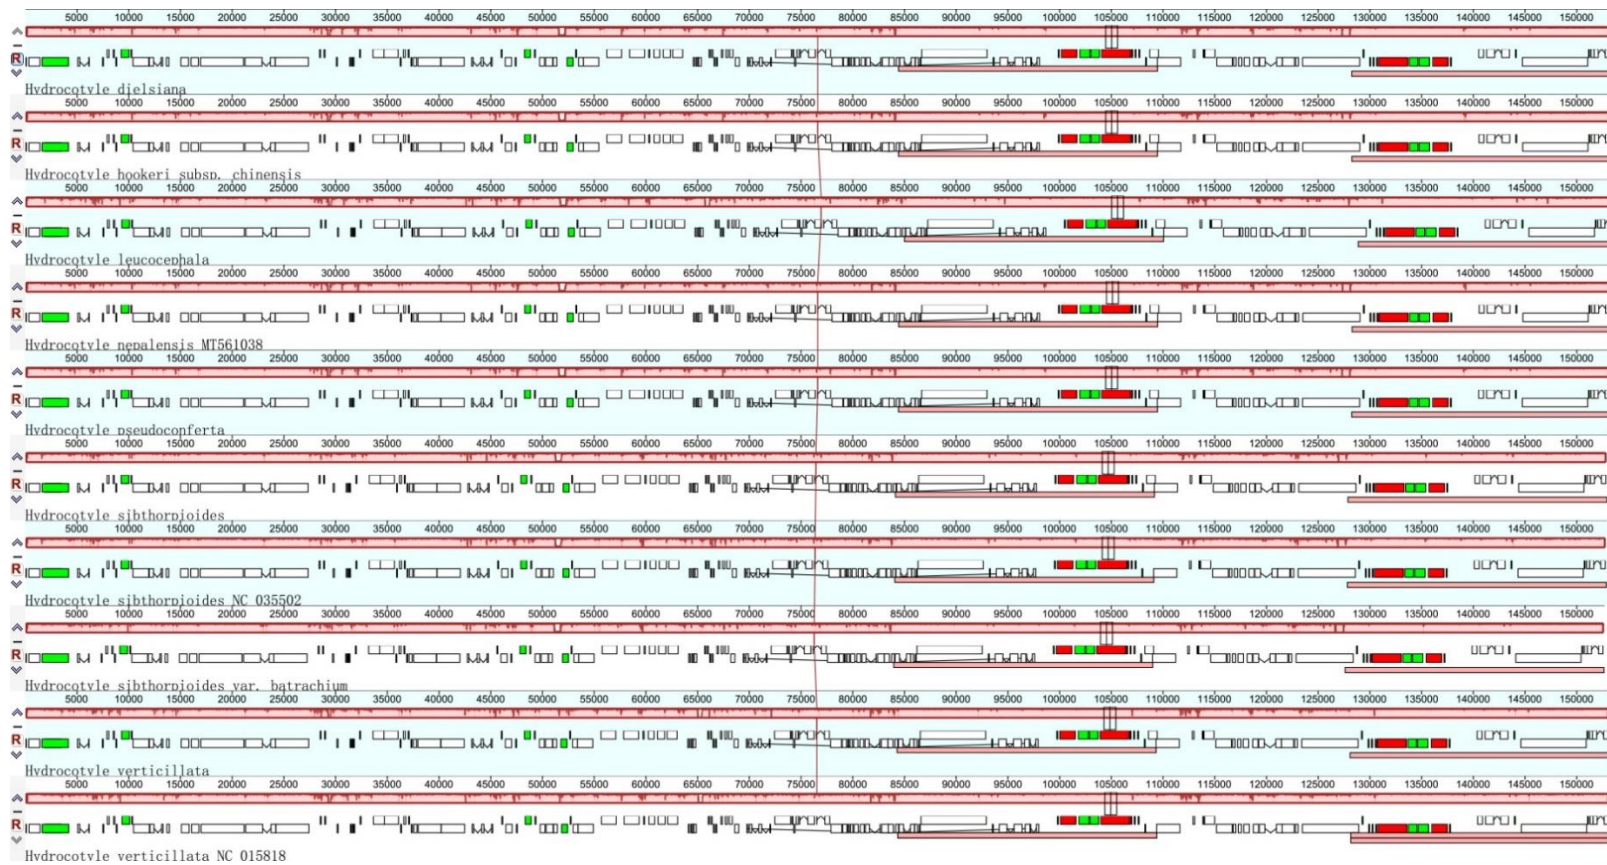



Figure S2. Six voucher specimens of the newly sequenced species were deposited in NAS (Herbarium, Institute of Botany, Chinese Academy of Sciences, Jiangsu Province).

NAS00638751: *Hydrocotyle hookeri* subsp. *chinensis*

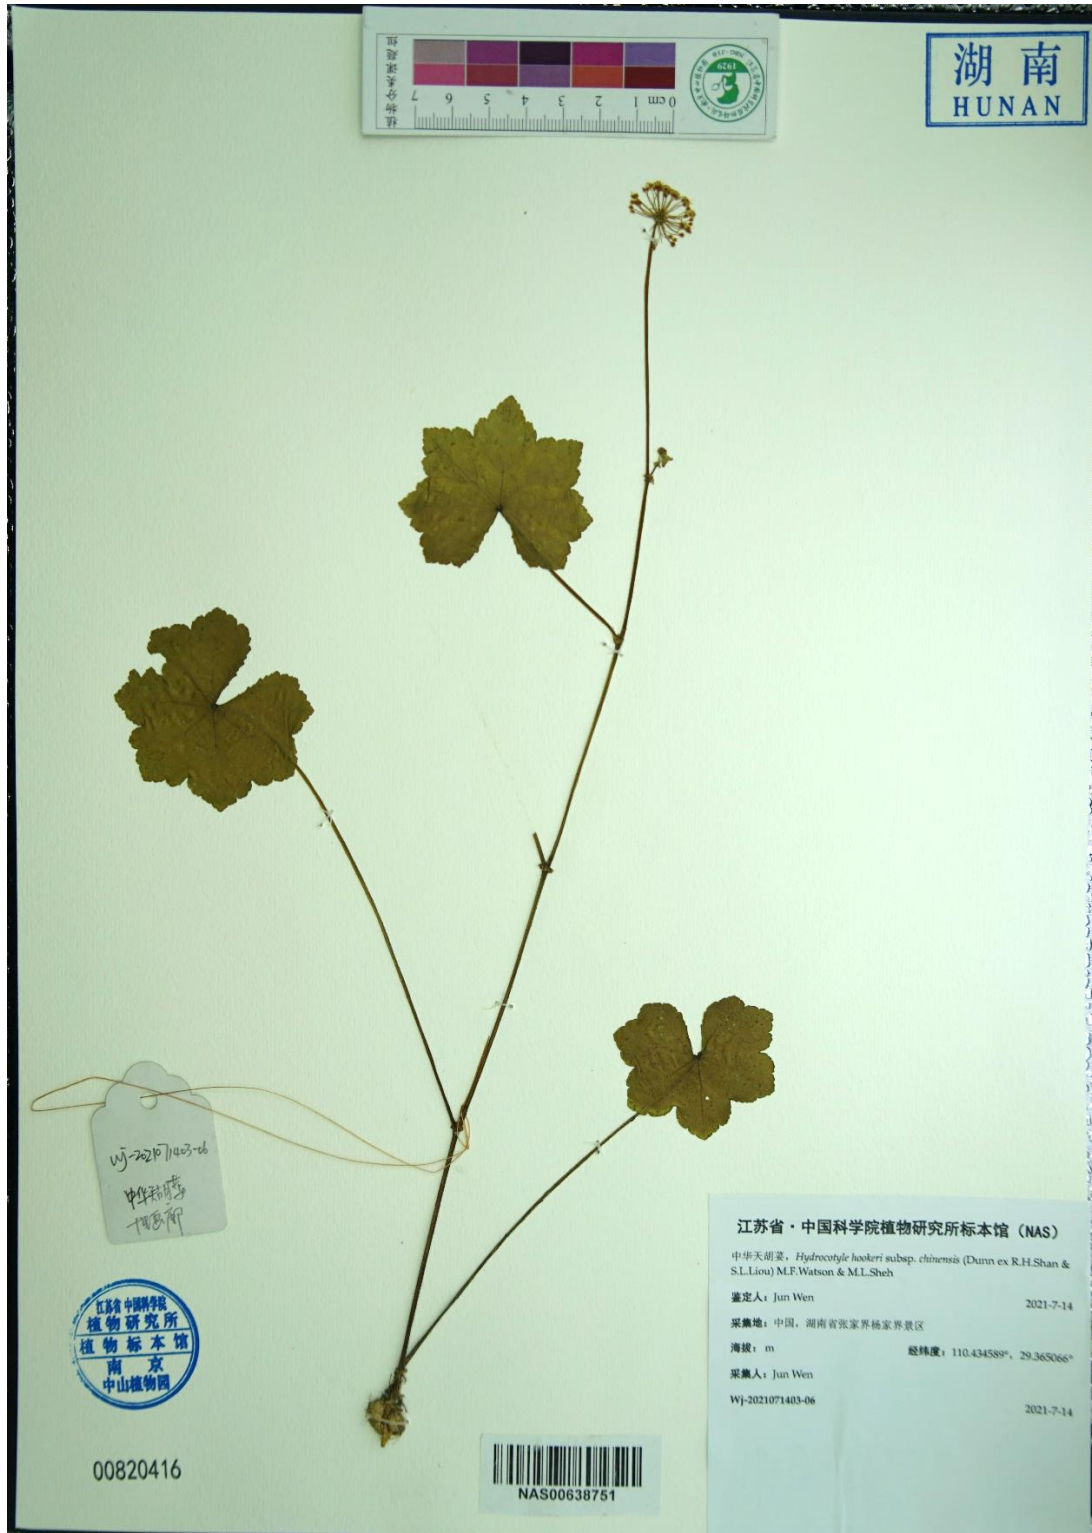

NAS00638767: *Hydrocotyle dielsiana*

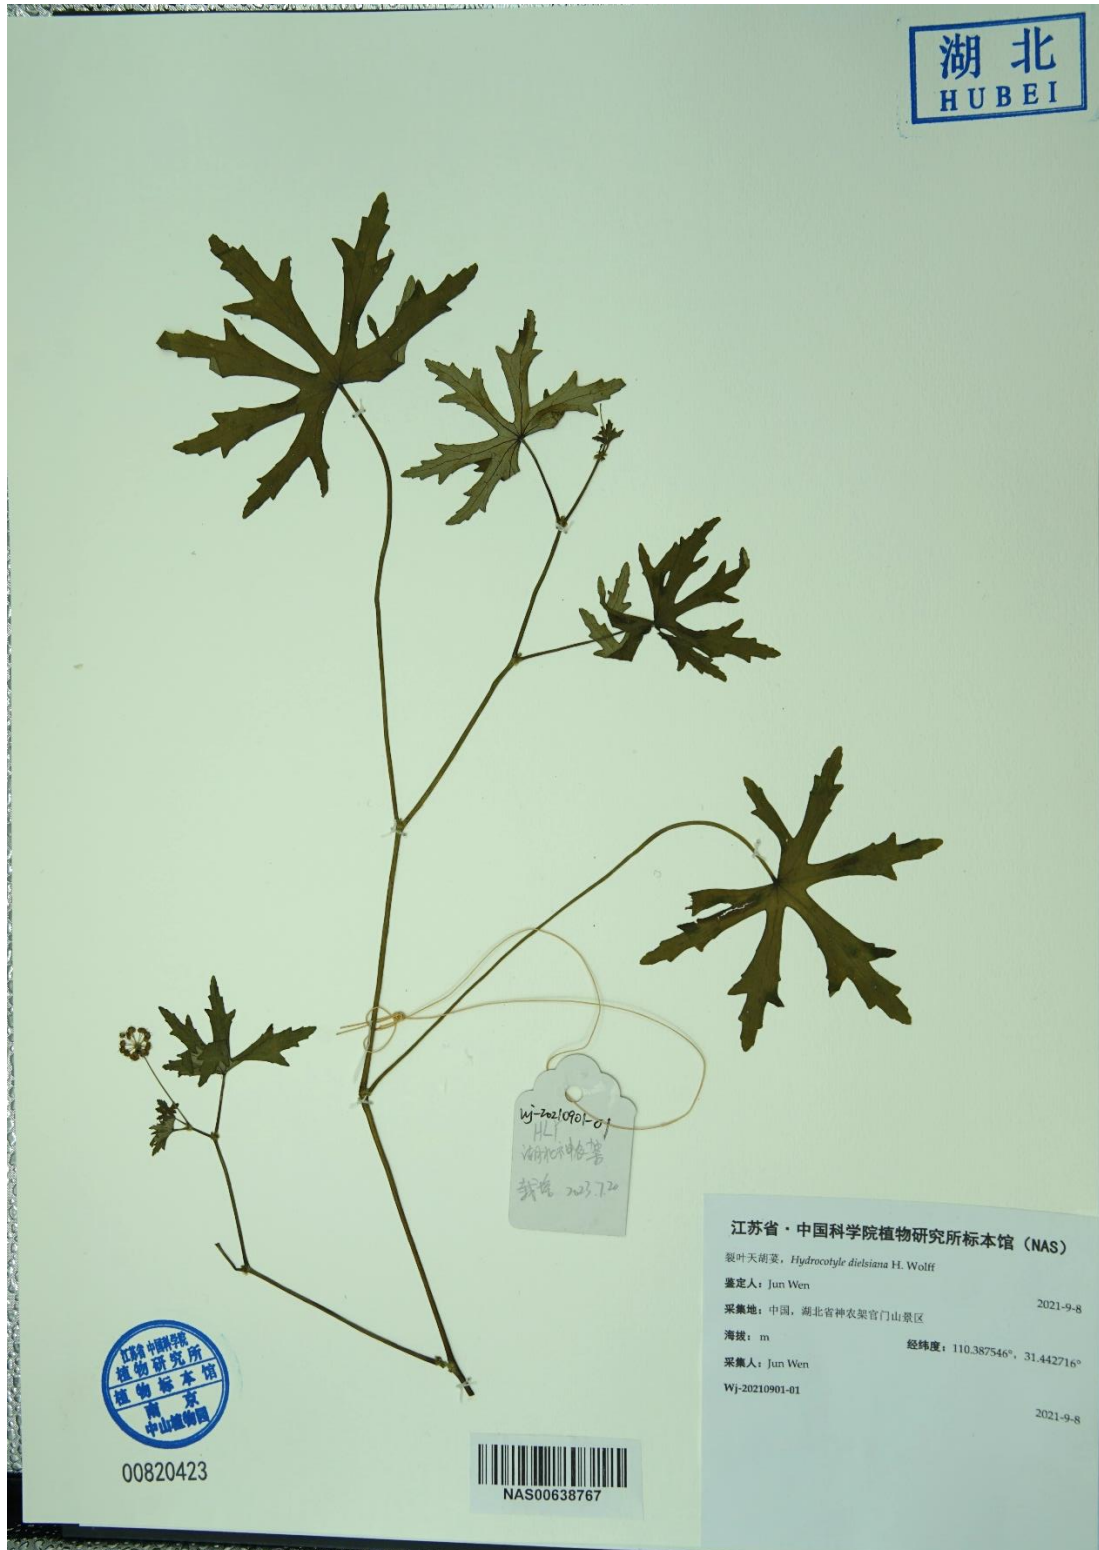

湖北  
HUBEI

Wj-20210901-01  
裂叶天胡荽  
Jun Wen 2021.7.20

中国科学院  
植物研究所  
南京  
中山植物园

00820423

NAS00638767

江苏省·中国科学院植物研究所标本馆 (NAS)  
裂叶天胡荽, *Hydrocotyle dielsiana* H. Wolff  
鉴定人: Jun Wen  
采集地: 中国, 湖北省神农架官门山景区  
海拔: m  
采集人: Jun Wen  
Wj-20210901-01  
经纬度: 110.387546°, 31.442716°  
2021-9-8



NAS00638784: *Hydrocotyle sibthorpioides* var. *batrachium*

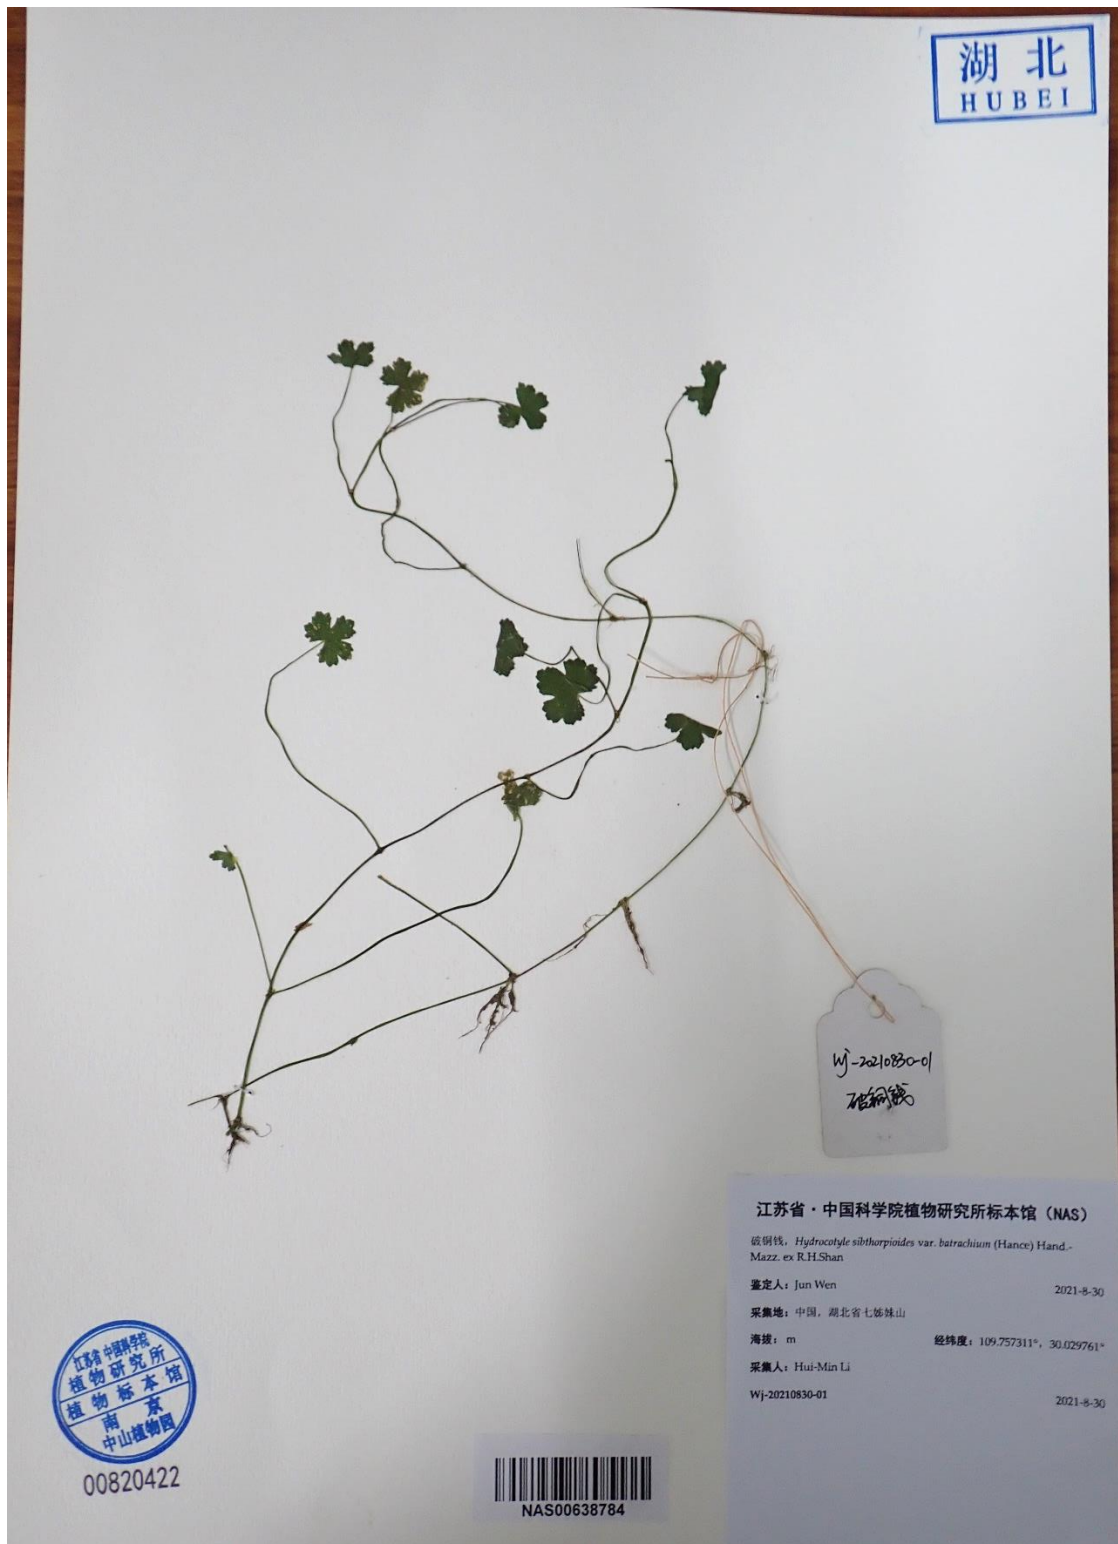

NAS00638788: *Hydrocotyle verticillata*

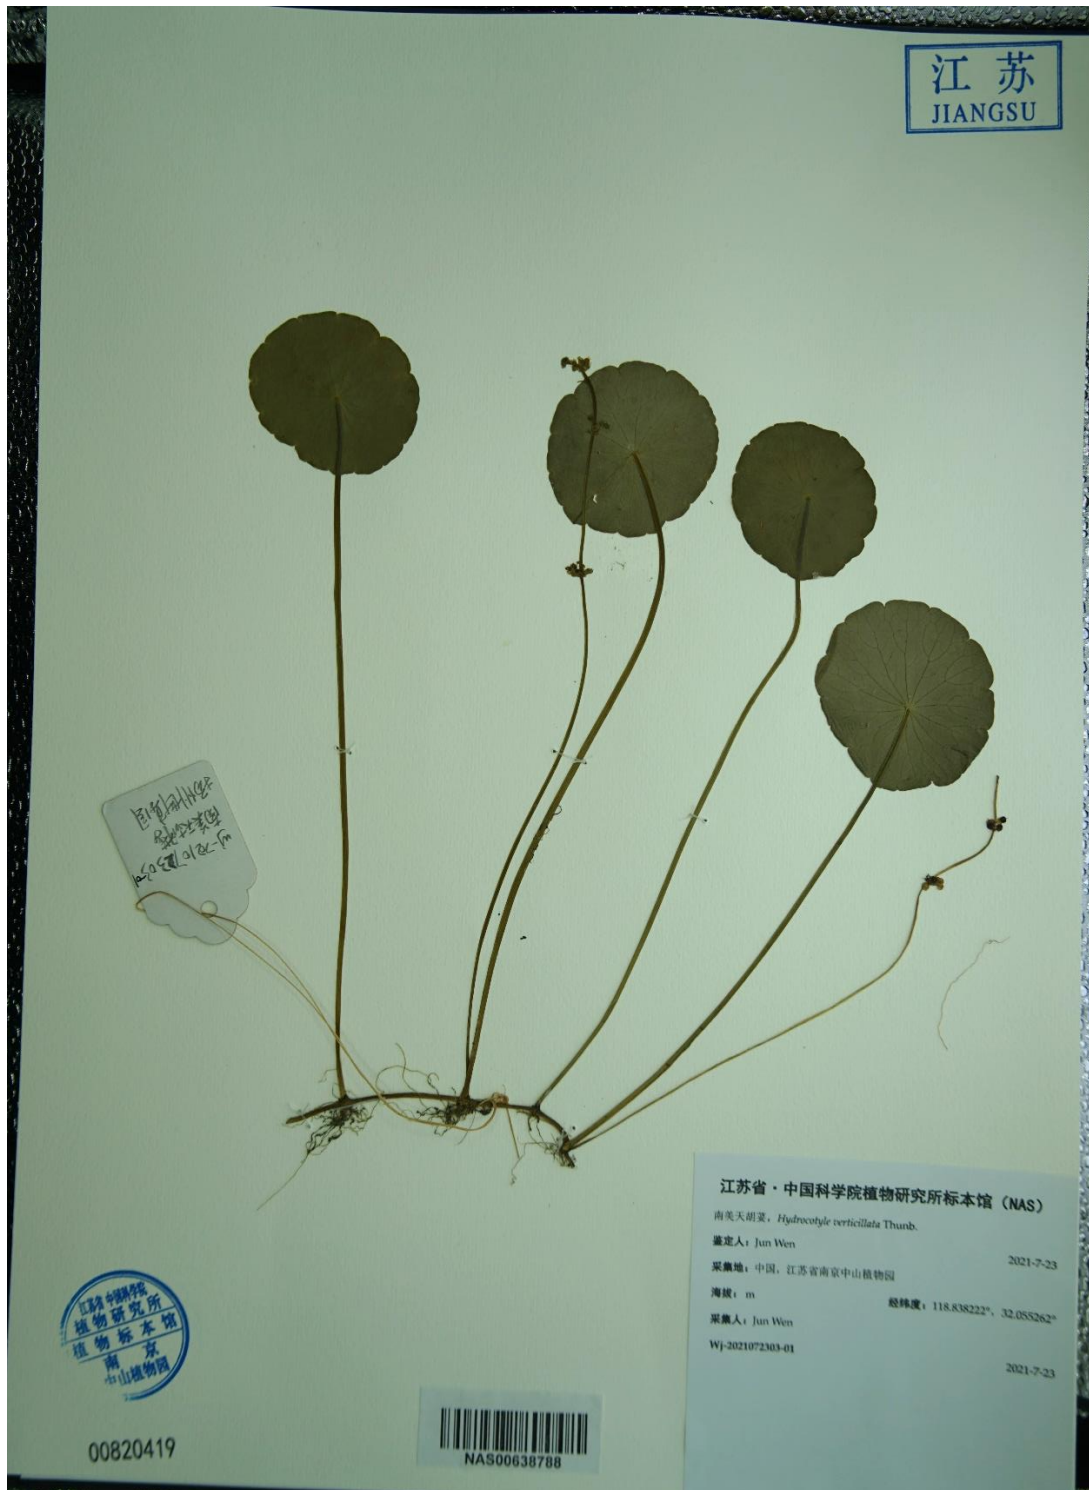

NAS00638791: *Hydrocotyle leucocephala*

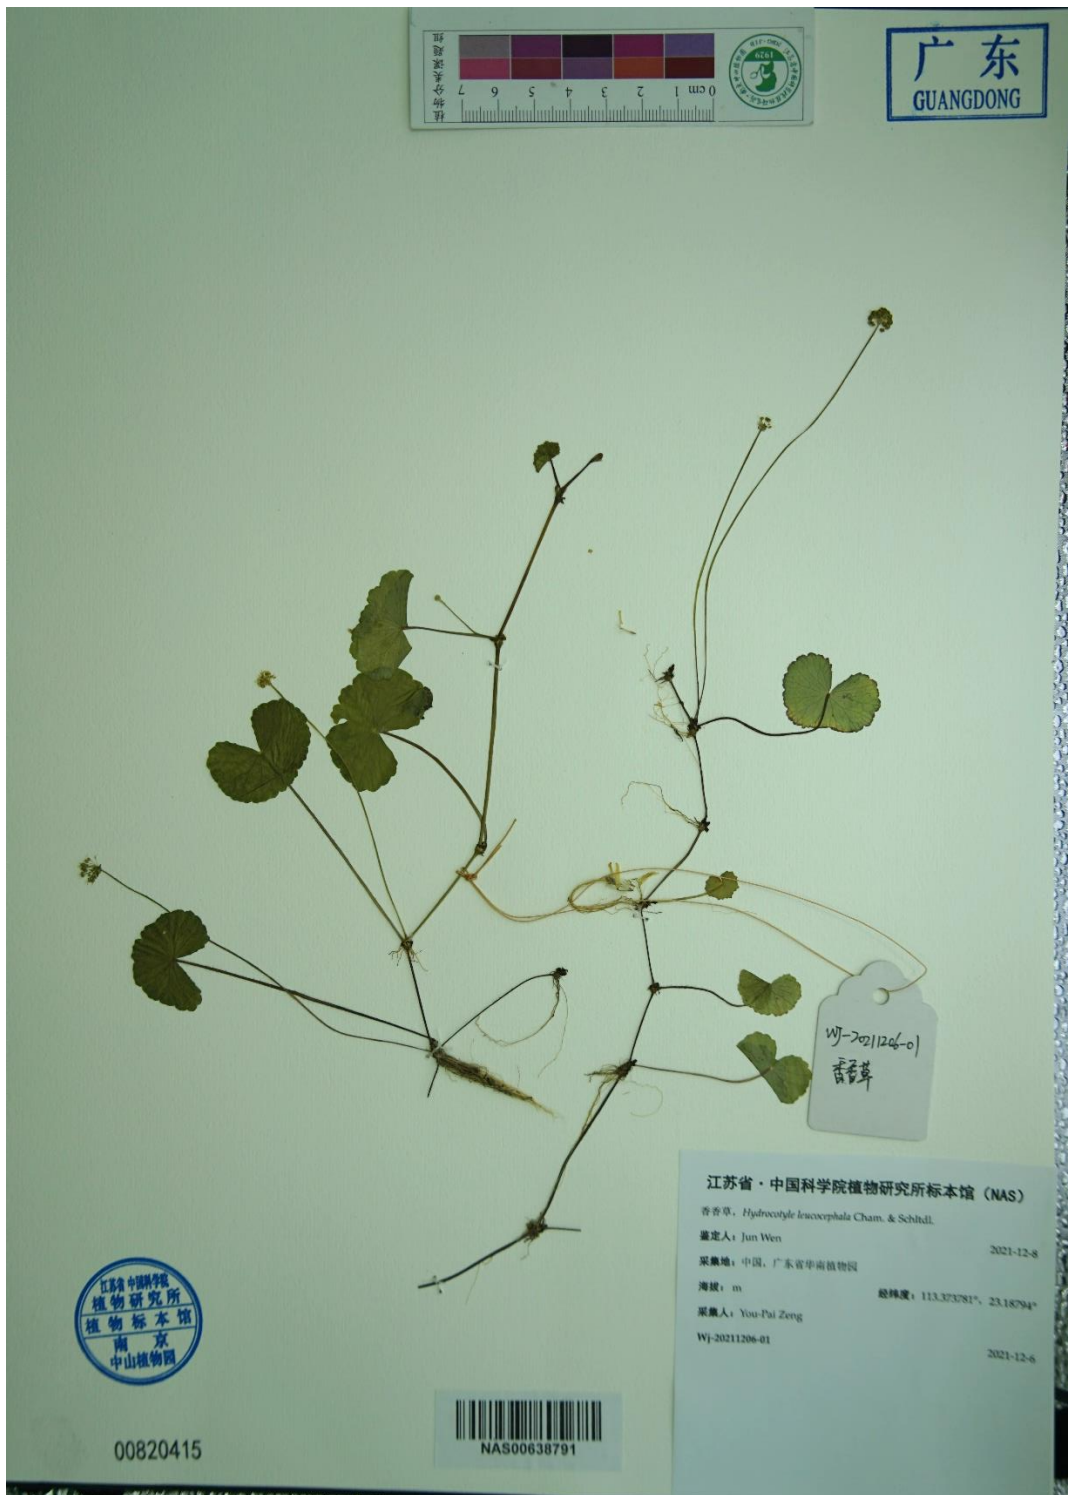



NAS00638796: *Hydrocotyle sibthorpioides*

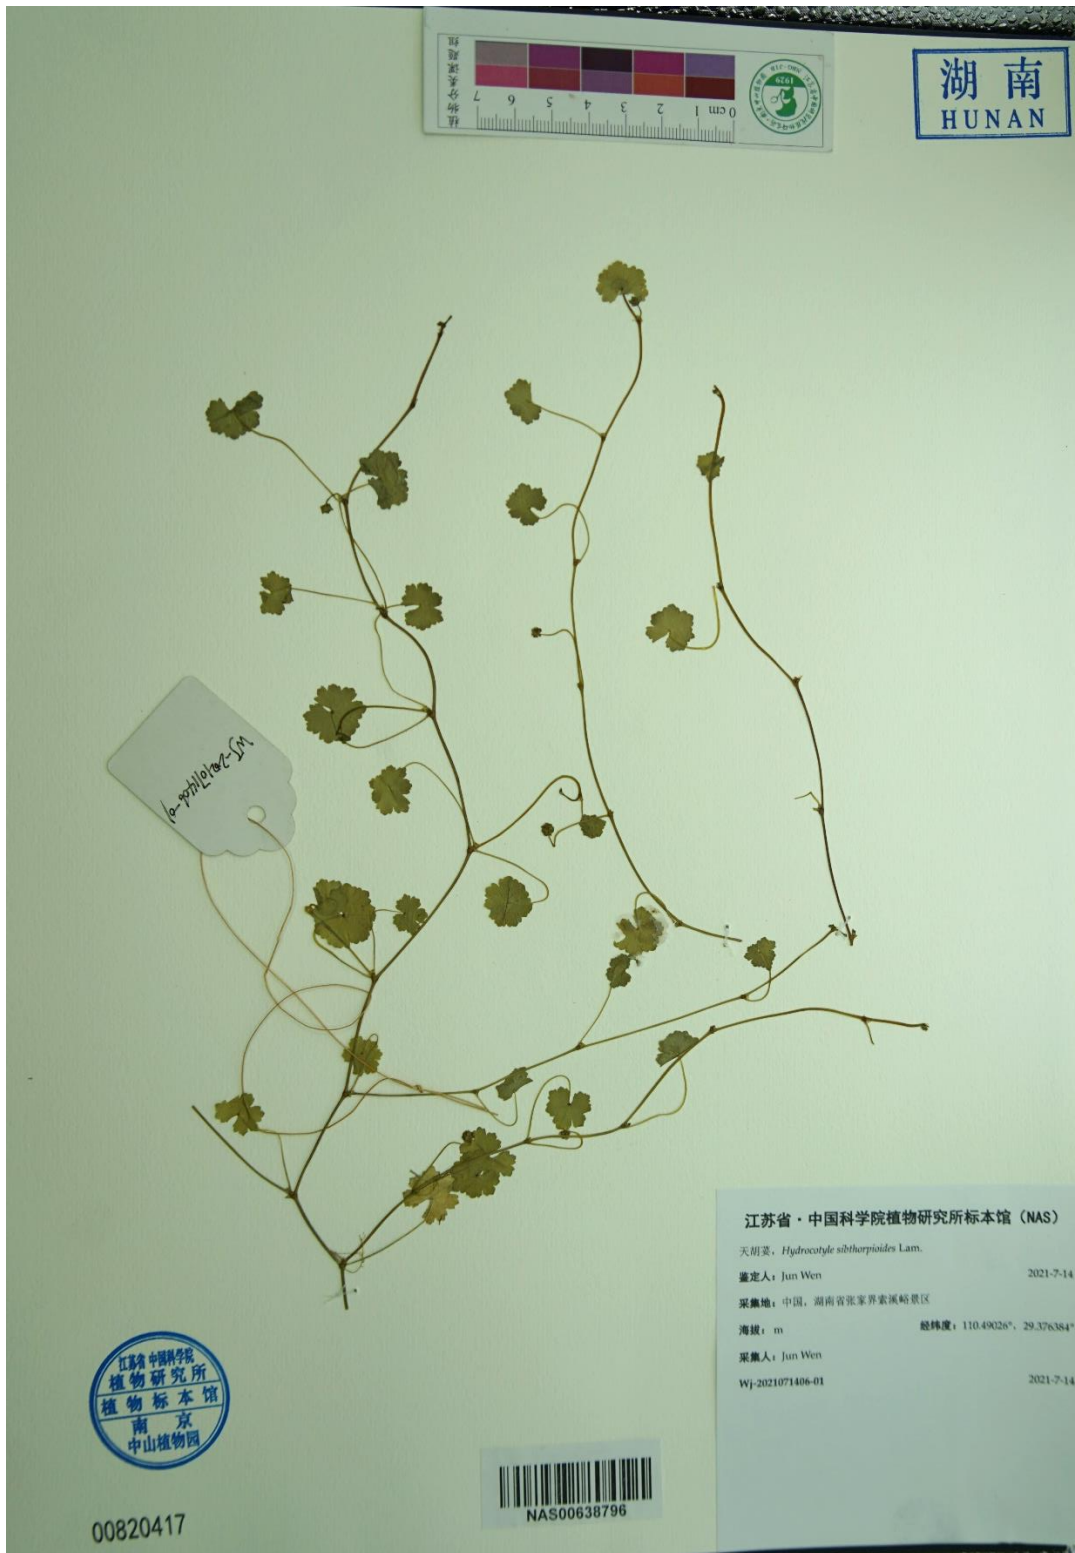

Supplement: 12870_2024_5483_MOESM1_ESM.pdf [file 12870_2024_5483_MOESM1_ESM.pdf]
